# Supplementary material
Source: publisher figshare collection journal article supplement (https://acs.figshare.com/ndownloader/files/9448924)

# Supporting Information

## Manganese(I)-Catalyzed Direct C-H Allylation of Arenes with Allenes

Shi-Yong Chen,<sup>†</sup> Qingjiang Li,<sup>\*,†,‡</sup> and Honggen Wang<sup>\*,†</sup>

<sup>†</sup>School of Pharmaceutical Sciences, Sun Yat-sen University, Guangzhou, 510006,  
China

<sup>‡</sup>State Key Laboratory of Natural and Biomimetic Drugs, Peking University, Beijing,  
100191, China

E-mail: [liqingj3@mail.sysu.edu.cn](mailto:liqingj3@mail.sysu.edu.cn), [wanghg3@mail.sysu.edu.cn](mailto:wanghg3@mail.sysu.edu.cn)

### Table of Contents

|                                                                                              |     |
|----------------------------------------------------------------------------------------------|-----|
| 1. Mechanistic studies .....                                                                 | S2  |
| 2. The mono- and diprenylation selectivity by using different equivalents of <b>2a</b> ..... | S10 |
| 3. Reference .....                                                                           | S10 |
| 4. NMR spectrum of some starting materials and products .....                                | S10 |

# 1. Mechanistic studies

## 1.1 Intermolecular KIE by independent experiments

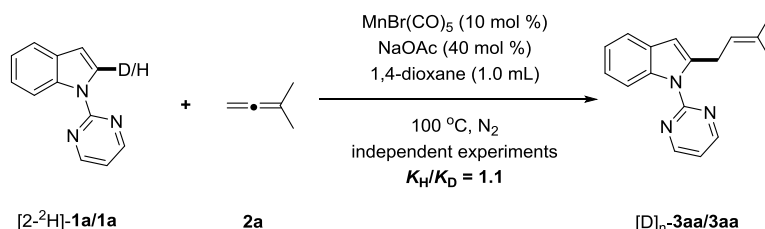

Two parallel reactions of 1,1-dimethylallene **2a** with **1a** and  $[2\text{-}^2\text{H}]\text{-1a}$  respectively were performed to determine the corresponding *KIE* value. **1a** (39.0 mg, 0.2 mmol) or  $[2\text{-}^2\text{H}]\text{-1a}$  (39.2 mg, 0.2 mmol),  $\text{MnBr}(\text{CO})_5$  (5.5 mg, 10 mol %),  $\text{NaOAc}$  (6.6 mg, 40 mol %), 1,4-dioxane (1.0 mL) and 1,1-dimethylallene **2a** (30  $\mu\text{L}$ , 1.5 mmol) were placed in a 15 mL Schlenk tube. The mixture was stirred at  $100\text{ }^\circ\text{C}$ . The crude yield was analysed by  $^1\text{H}$  NMR using 1-iodo-4-methoxybenzene as the internal standard. The initial reaction rate was obtained by plotting the four points to obtain *KIE*:

| Time (min)                | 4  | 8  | 12 | 16 |
|---------------------------|----|----|----|----|
| <b>3aa</b>                | 10 | 23 | 36 | 46 |
| $[\text{D}]_n\text{-3aa}$ | 9  | 21 | 33 | 43 |

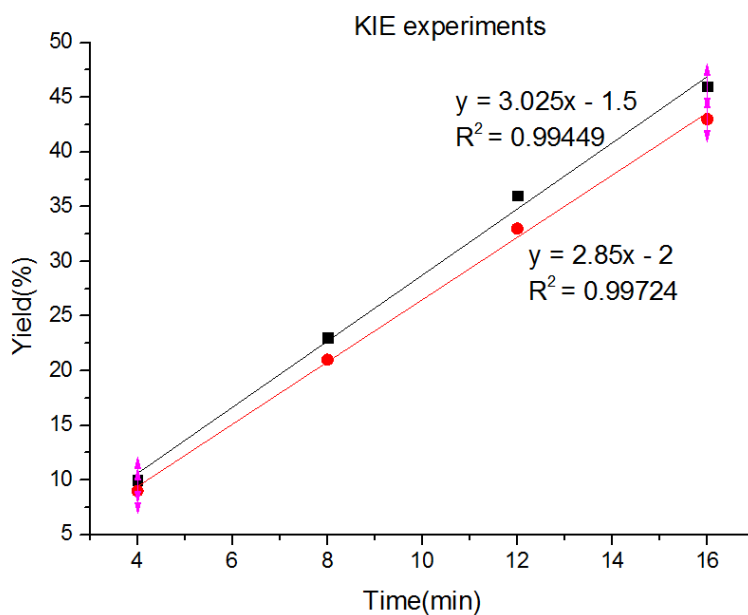

## 1.2 Manganese-catalyzed H/D exchange experiments

(a)

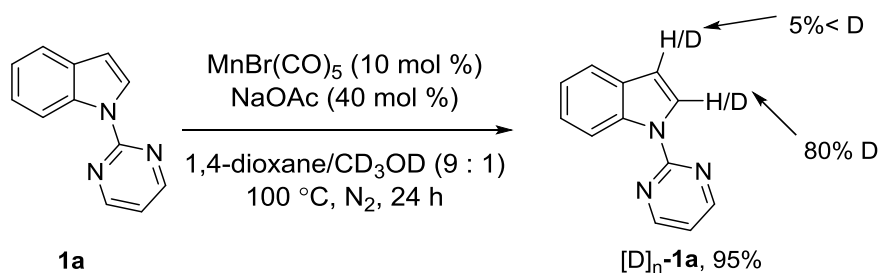

1-(Pyrimidin-2-yl)-1H-indole **1a** (0.2 mmol), NaOAc (6.6 mg, 40 mol %),  $\text{MnBr}(\text{CO})_5$  (5.5 mg, 10 mol %), 1,4-dioxane (0.9 mL) and  $\text{CD}_3\text{OD}$  (0.1 mL) were placed in a 15 mL Schlenk tube under  $\text{N}_2$ . The mixture was stirred at 100 °C for 24 h. At ambient temperature, the reaction mixture was diluted with EtOAc (10 mL) and  $\text{H}_2\text{O}$  (5 mL). The resulting mixture was extracted with EtOAc ( $3 \times 10$  mL). The combined organic layer was washed with brine (10 mL), and then dried over  $\text{Na}_2\text{SO}_4$ . After concentration under reduced pressure, purification by column chromatography on silica gel (PE/EtOAc = 50/1) yielded  $[\text{D}]_n\text{-1a}$  (37.0 mg, 95%). The D incorporation was determined by  $^1\text{H}$ -NMR spectroscopy.

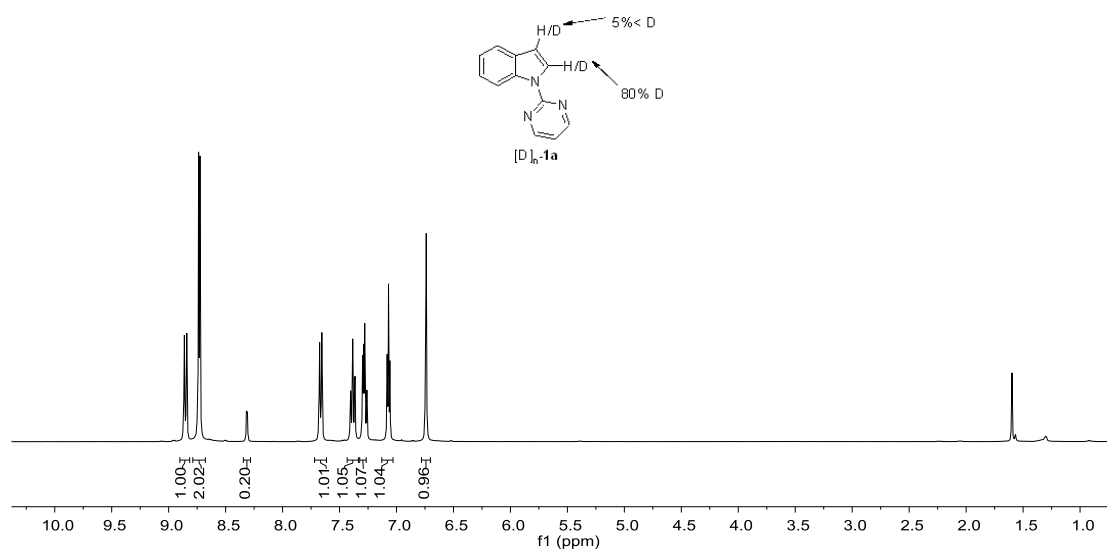

(b)

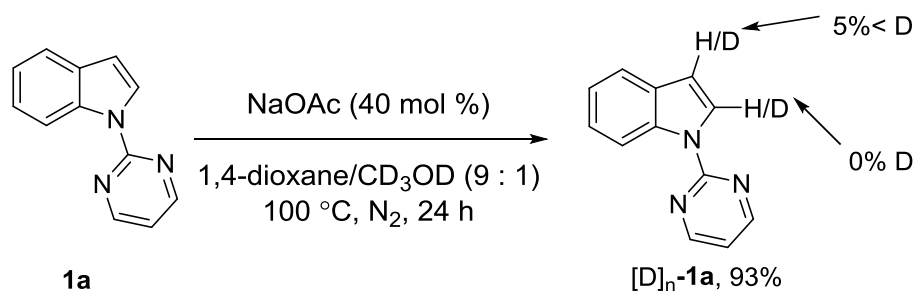

1-(Pyrimidin-2-yl)-1H-indole **1a** (0.2 mmol), NaOAc (6.6 mg, 40 mol %), 1,4-dioxane (0.9 mL) and  $CD_3OD$  (0.1 mL) were placed in a 15 mL Schlenk tube under  $N_2$ . The mixture was stirred at 100 °C for 24 h. At ambient temperature, the reaction mixture was diluted with EtOAc (10 mL) and  $H_2O$  (5 mL). The resulting mixture was extracted with EtOAc ( $3 \times 10$  mL). The combined organic layer was washed with brine (10 mL), and then dried over  $Na_2SO_4$ . After concentration under reduced pressure, purification by column chromatography on silica gel (PE/EtOAc = 50/1) yielded  $[D]_n\text{-1a}$  (36.5 mg, 96%). The D incorporation was determined by  $^1H$ -NMR spectroscopy.

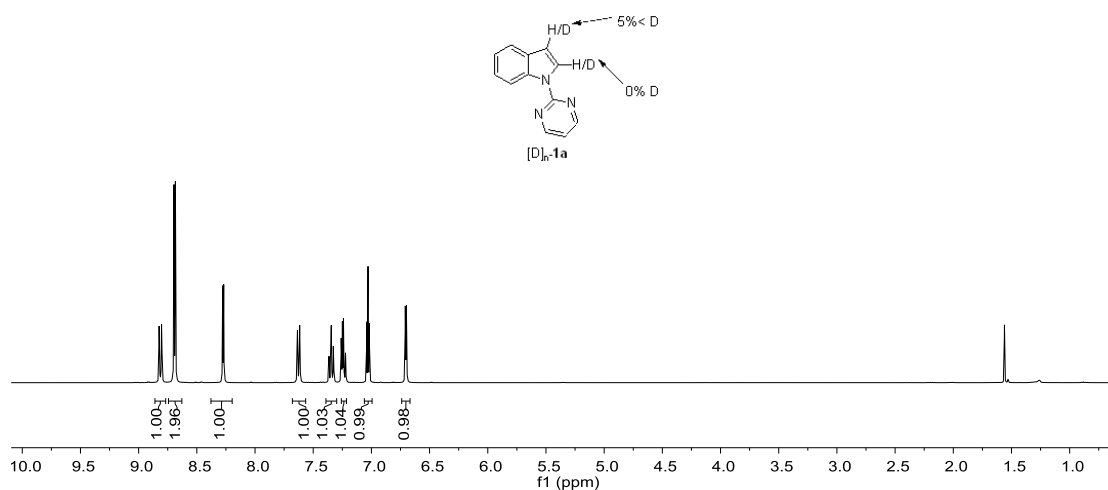

(c)

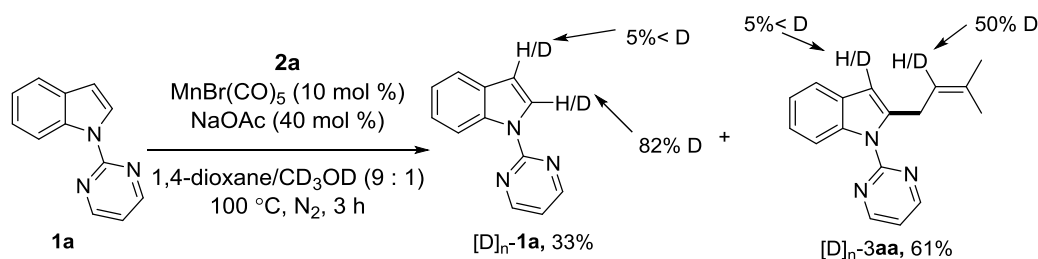

1-(Pyrimidin-2-yl)-1H-indole **1a** (0.2 mmol), NaOAc (6.6 mg, 40 mol %), MnBr(CO)<sub>5</sub> (5.5 mg, 10 mol %), 1,4-dioxane (1.0 mL) and 1,1-dimethylallene **2a** (0.3 mmol, 1.5 equiv) were placed in a 15 mL Schlenk tube under N<sub>2</sub>. The mixture was stirred at 100 °C for 24 h. At ambient temperature, the reaction mixture was diluted with EtOAc (10 mL) and H<sub>2</sub>O (5 mL). The resulting mixture was extracted with EtOAc (3×10 mL). The combined organic layer was washed with brine (10 mL), and then dried over Na<sub>2</sub>SO<sub>4</sub>. After concentration under reduced pressure, purification by column chromatography on silica gel (PE/EtOAc = 64/1) yielded [D]<sub>n</sub>-**1a** (13.0 mg, 33%) and [D]<sub>n</sub>-**3aa** (31.5 mg, 61%). The D incorporation was determined by <sup>1</sup>H-NMR spectroscopy.

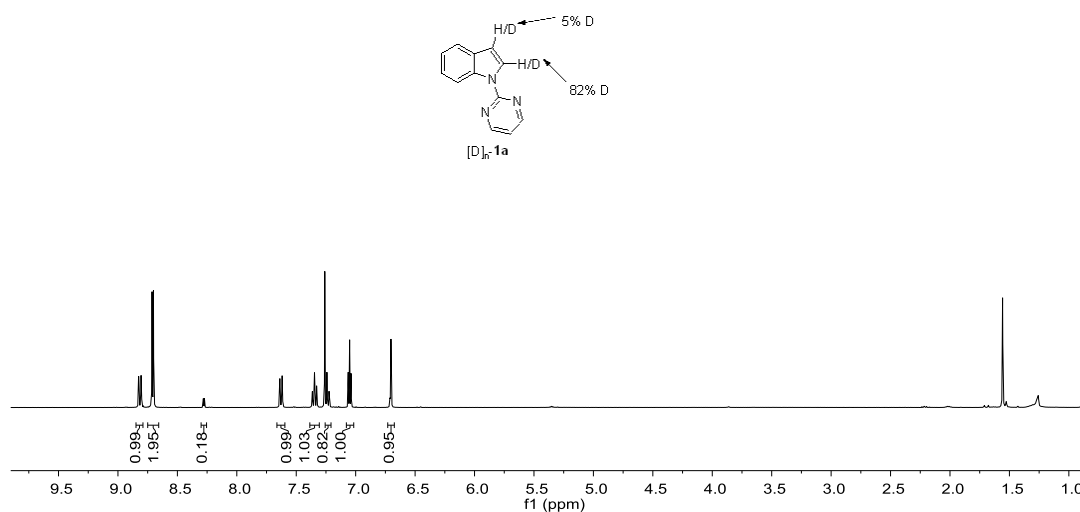

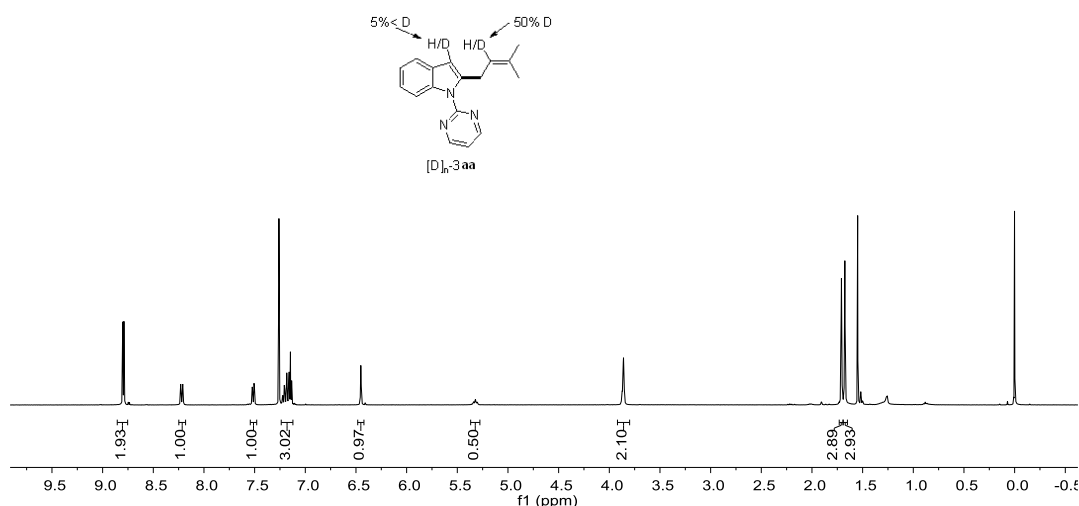

(d)

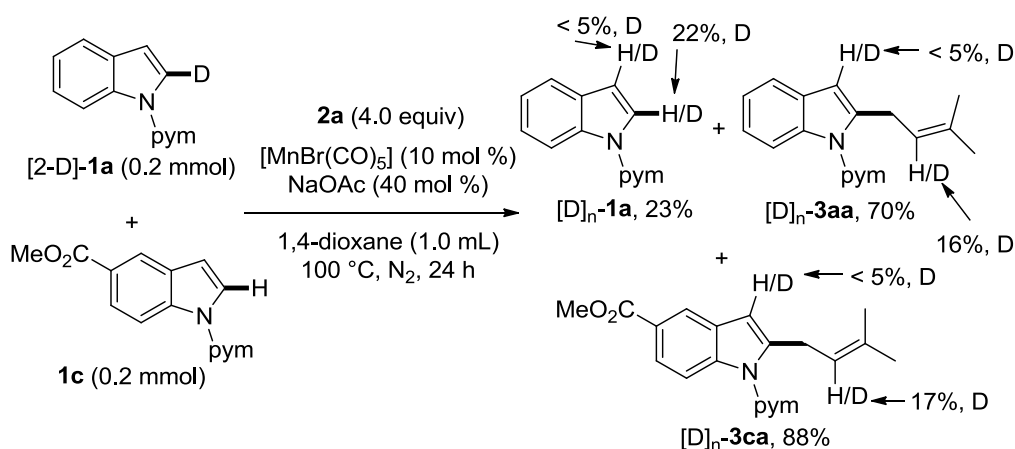

[2-<sup>2</sup>H]-**1a** (0.2 mmol), **1c**, NaOAc (6.6 mg, 40 mol %), MnBr(CO)<sub>5</sub> (5.5 mg, 10 mol %), 1,4-dioxane (1.0 mL) and 1,1-dimethylallene **2a** (0.8 mmol, 4.0 equiv) were placed in a 15 mL Schlenk tube under N<sub>2</sub>. The mixture was stirred at 100 °C for 24 h. At ambient temperature, the reaction mixture was diluted with EtOAc (10 mL) and H<sub>2</sub>O (5 mL). The resulting mixture was extracted with EtOAc (3×10 mL). The combined organic layer was washed with brine (10 mL), and then dried over Na<sub>2</sub>SO<sub>4</sub>. After concentration under reduced pressure, purification by column chromatography on silica gel (PE/EtOAc = 64/1→16/1) yielded [D]<sub>n</sub>-**1a** (9.0 mg, 23%), [D]<sub>n</sub>-**3aa** (36.7

mg, 70%) and [D]<sub>n</sub>-**3ca** (56.5 mg, 88%). The D incorporation was determined by <sup>1</sup>H-NMR spectroscopy.

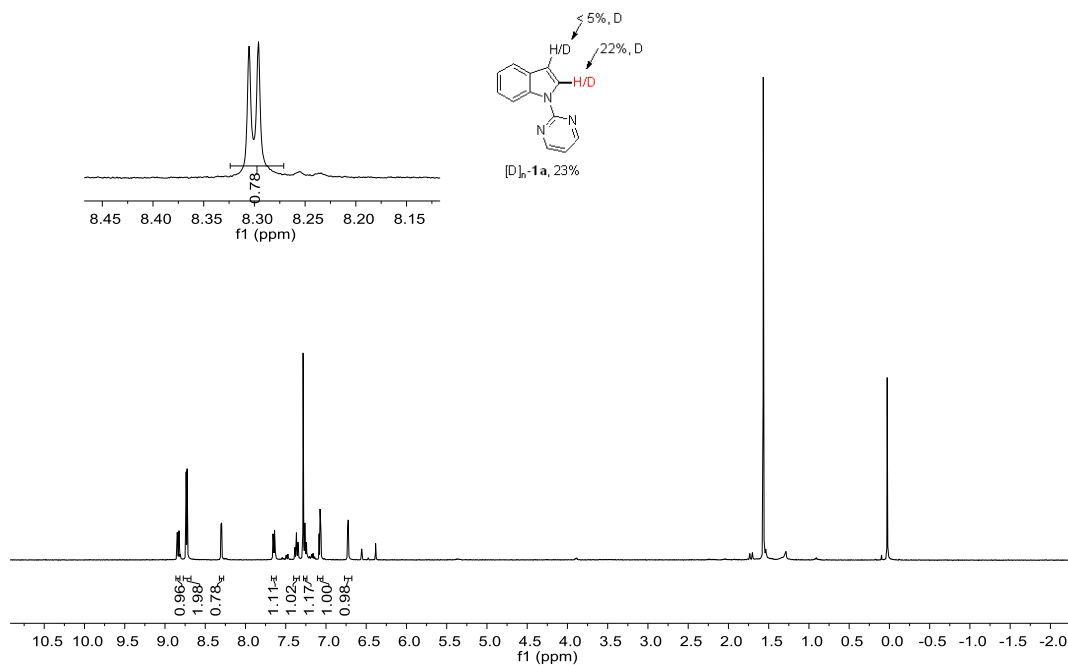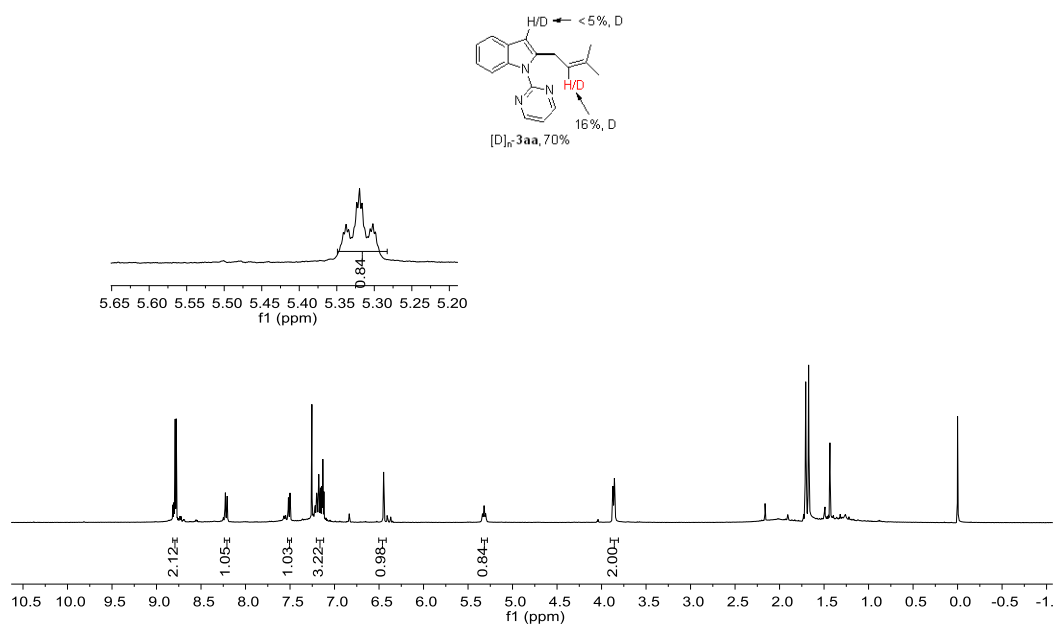

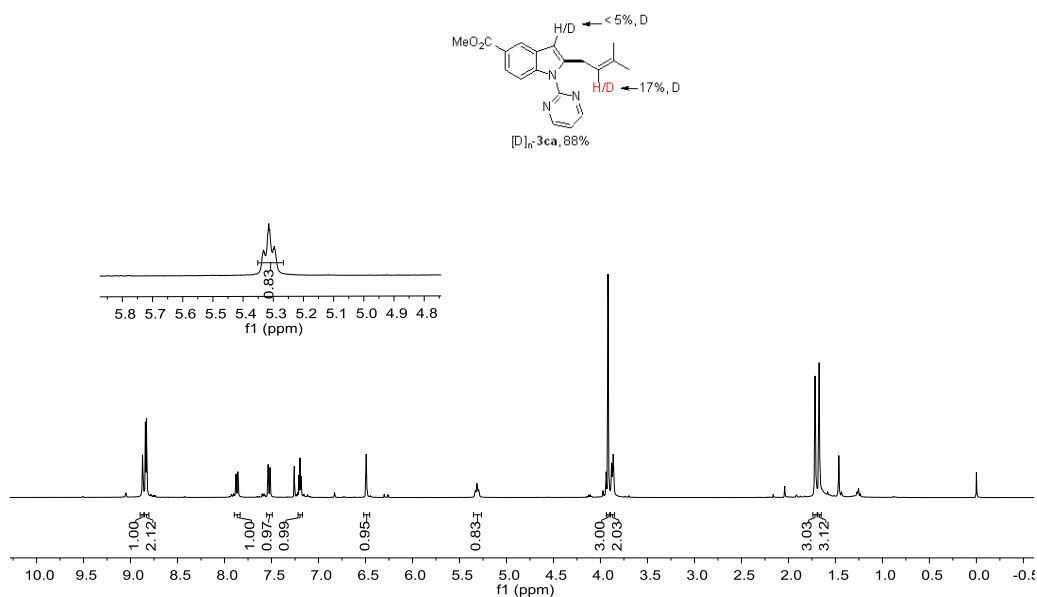

### 1.3 Stoichiometric prenylation with cyclometalated complex **4**<sup>1</sup>

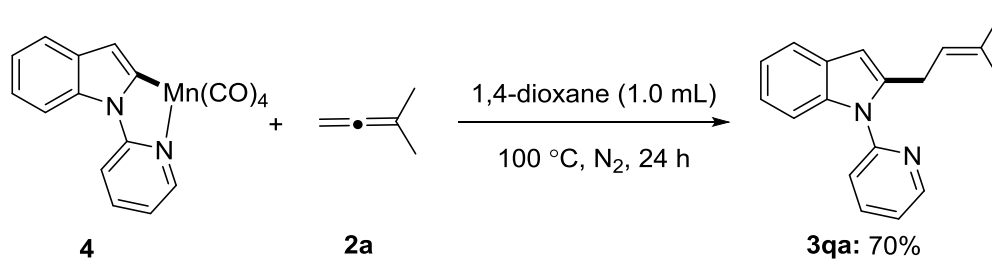

**4** (72 mg, 0.2 mmol), 1,1-dimethylallene **2a** (30  $\mu\text{L}$ , 0.3 mmol), and 1,4-dioxane (1.0 mL) were placed in a 15 mL Schlenk tube under  $\text{N}_2$ . The mixture was stirred at 100 °C for 24 h. At ambient temperature, the reaction mixture was transferred into a round flask with EtOAc and concentrated under reduced pressure. Purification by flash column chromatography on silica gel (PE/EtOAc = 64/1) afforded product **3qa** (36.7, 70%).



## 1.4 Catalytic reactivity of cyclometalated complex **4**

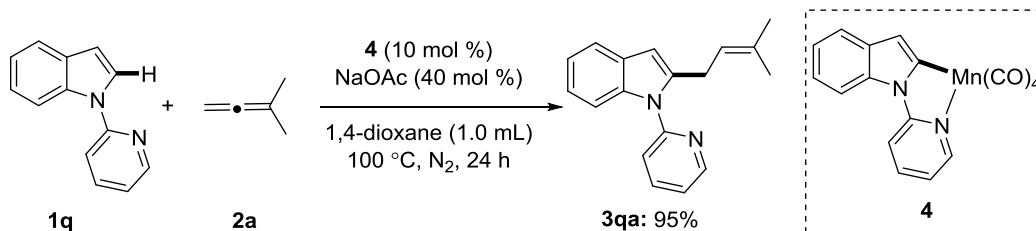

1-(Pyridin-2-yl)-1H-indole **1q** (38.8 mg, 0.2 mmol), 1,1-dimethylallene **2a** (30  $\mu$ L, 0.20 mmol), **4** (7.2 mg, 10 mol %), NaOAc (6.6 mg, 40 mol %) and 1,4-dioxane (1.0 mL) were placed in a 15 mL Schlenk tube under N<sub>2</sub>. The mixture was stirred at 100 °C for 24 h. At ambient temperature, the reaction mixture was transferred into a round flask with EtOAc and concentrated under reduced pressure. Purification by flash column chromatography on silica gel (PE/EtOAc = 64/1) afforded the desired product **3qa** (49.8 mg, 95% based on 0.20 mmol).

## 1.5 Intermolecular competition experiments between arenes **1d** and **1f**:

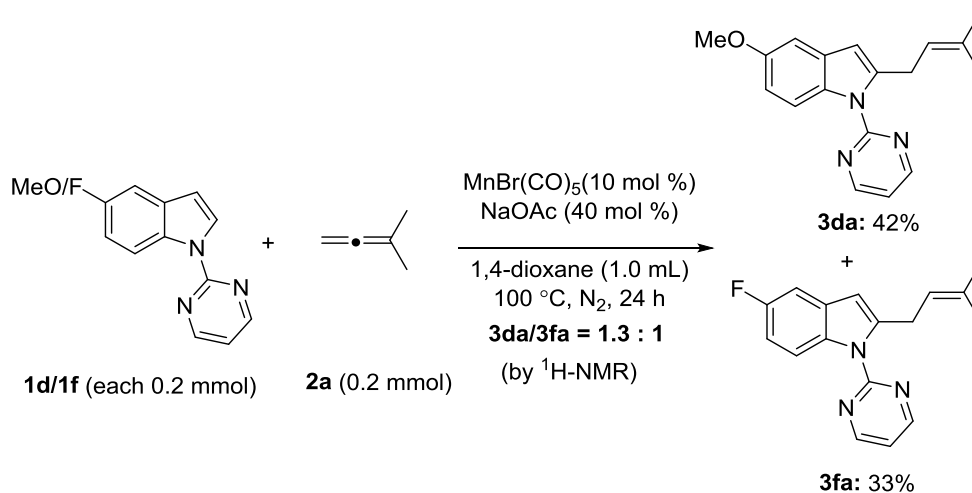

5-Methoxy-1-(pyrimidin-2-yl)-1H-indole (**1d**) (45 mg, 0.20 mmol), 5-fluoro-1-(pyrimidin-2-yl)-1H-indole (**1f**) (43 mg, 0.20 mmol), 1,1-dimethylallene (**2a**) (20  $\mu$ L, 0.20 mmol), MnBr(CO)<sub>5</sub> (5.5 mg, 10 mol %), NaOAc (6.6 mg, 40 mol %) and 1,4-dioxane (1.0 mL) were placed in a 15 mL Schlenk tube under N<sub>2</sub>. The mixture was stirred at 100 °C for 24 h. At ambient temperature, the reaction mixture was

diluted with EtOAc (10 mL), then 1-iodo-4-methoxybenzene (46.8 mg, 0.2 mmol) was added as internal standard, the crude mixture was analyzed to obtain the  $^1\text{H}$ -NMR conversion of the products **3da** (42%) and **3fa** (33%).

## 2. The mono- and diprenylation selectivity by using different equivalents of **2a**

**Scheme 2**

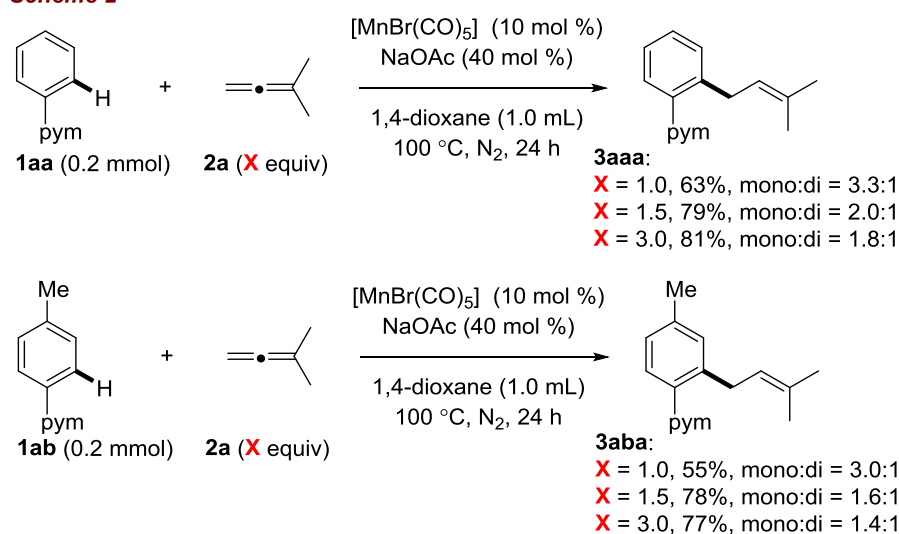

## 3. Reference

1. Liu, W.; Richter, S. C.; Zhang, Y.; Ackermann, L. *Angew. Chem. Int. Ed.* **2016**, *55*, 7747.

## 4. NMR spectrum of some starting materials and products

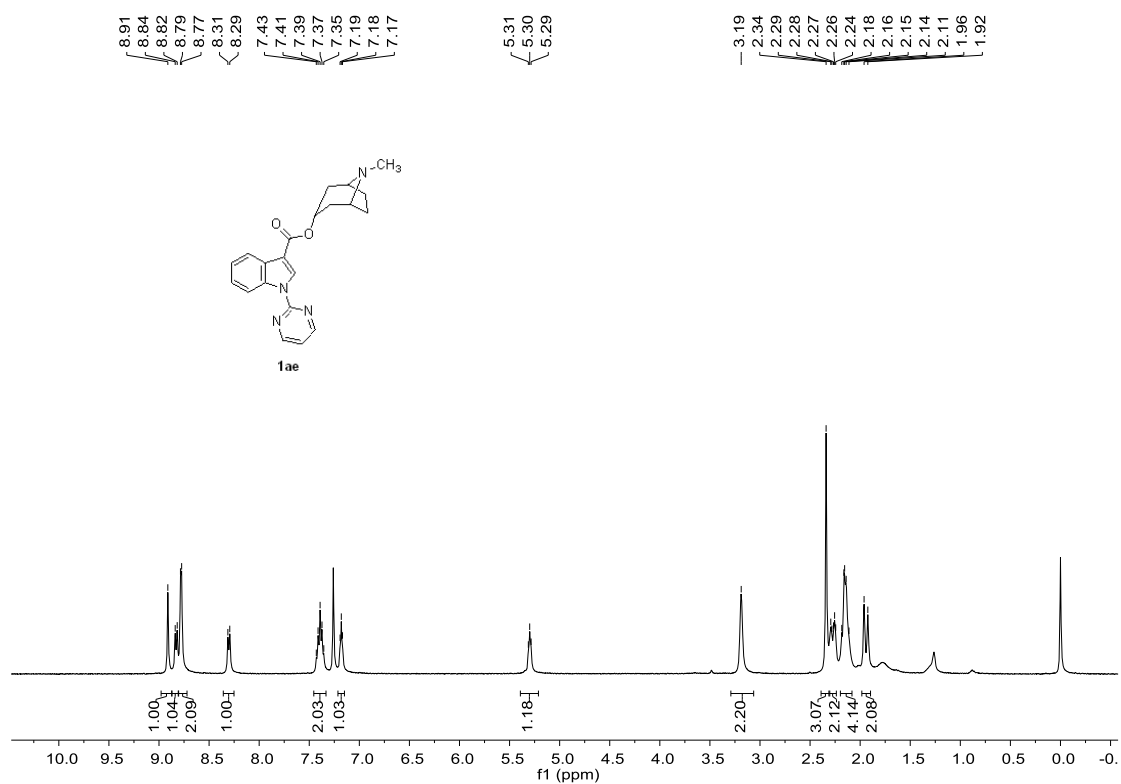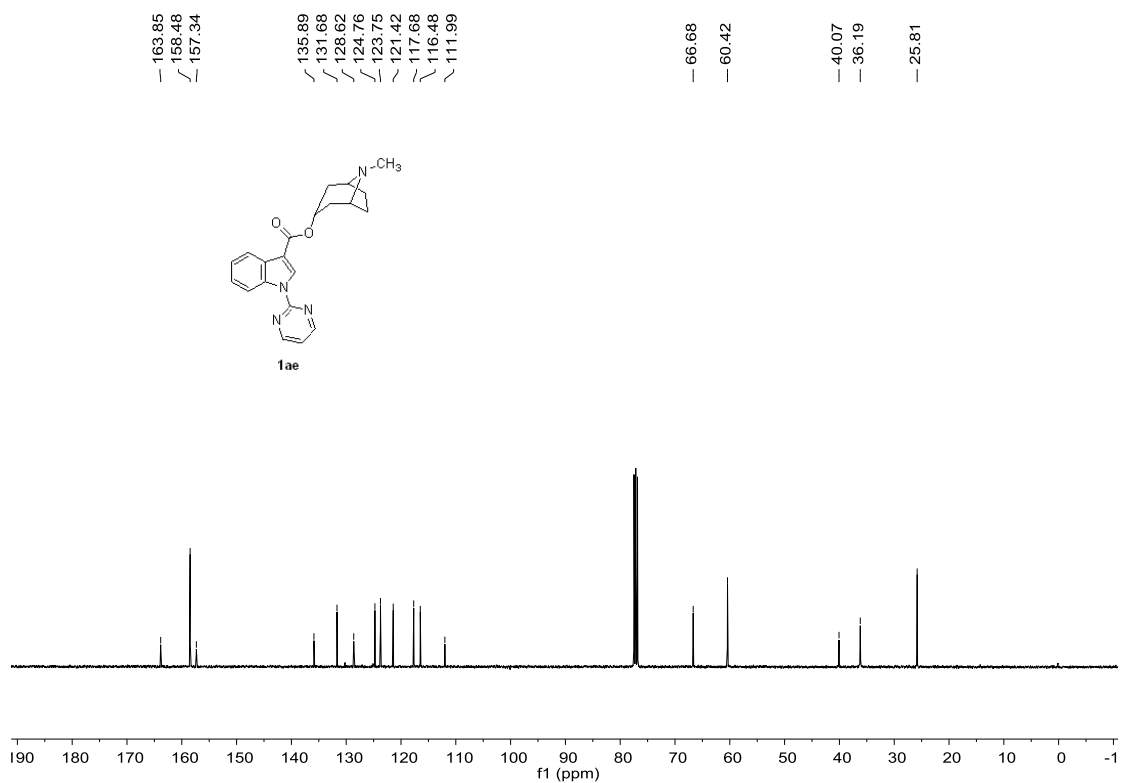

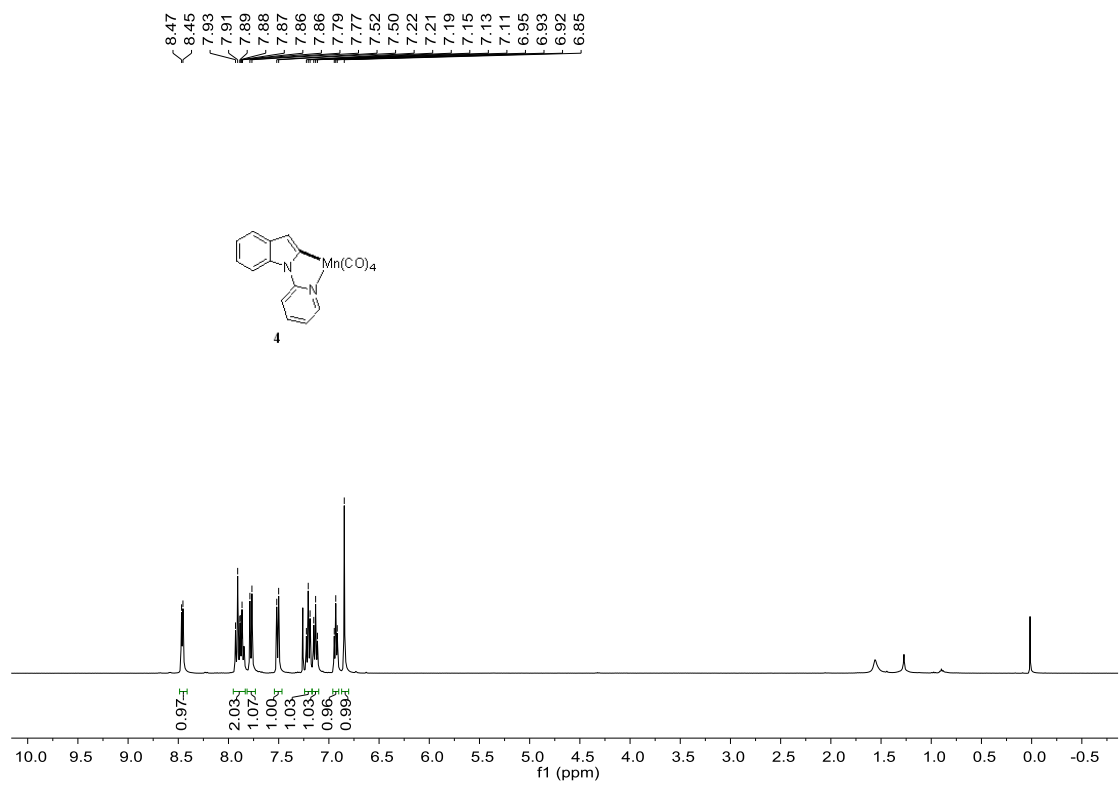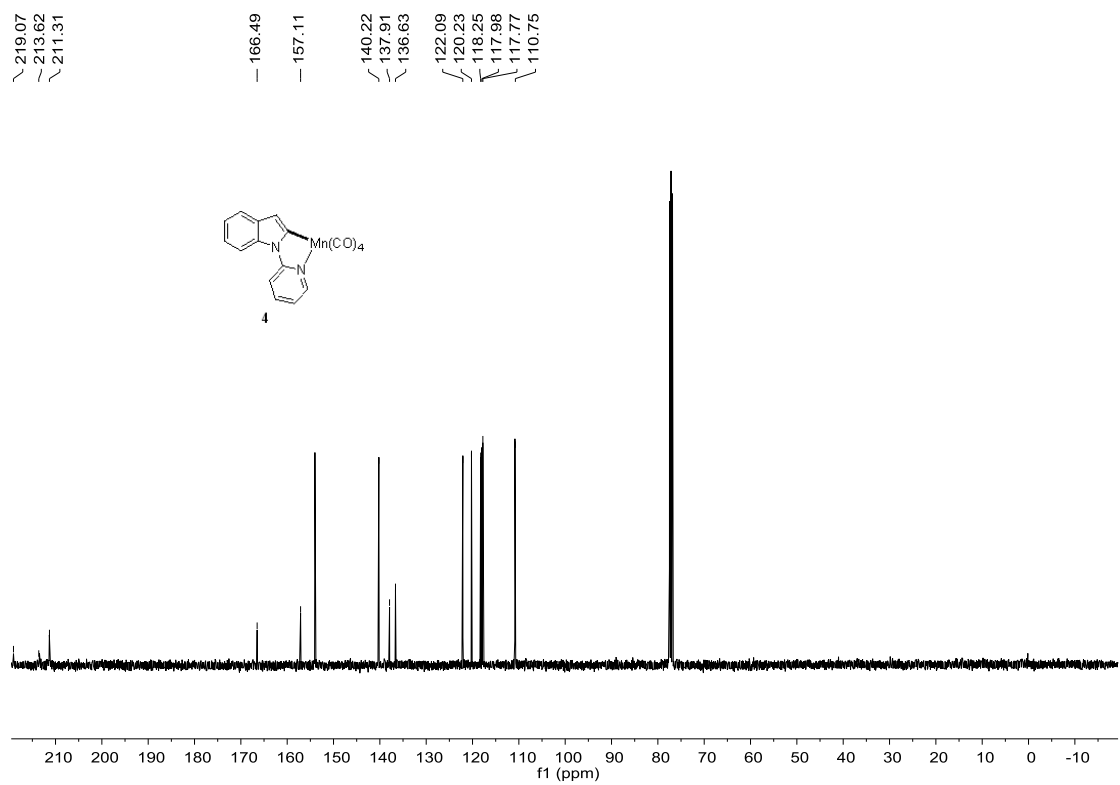

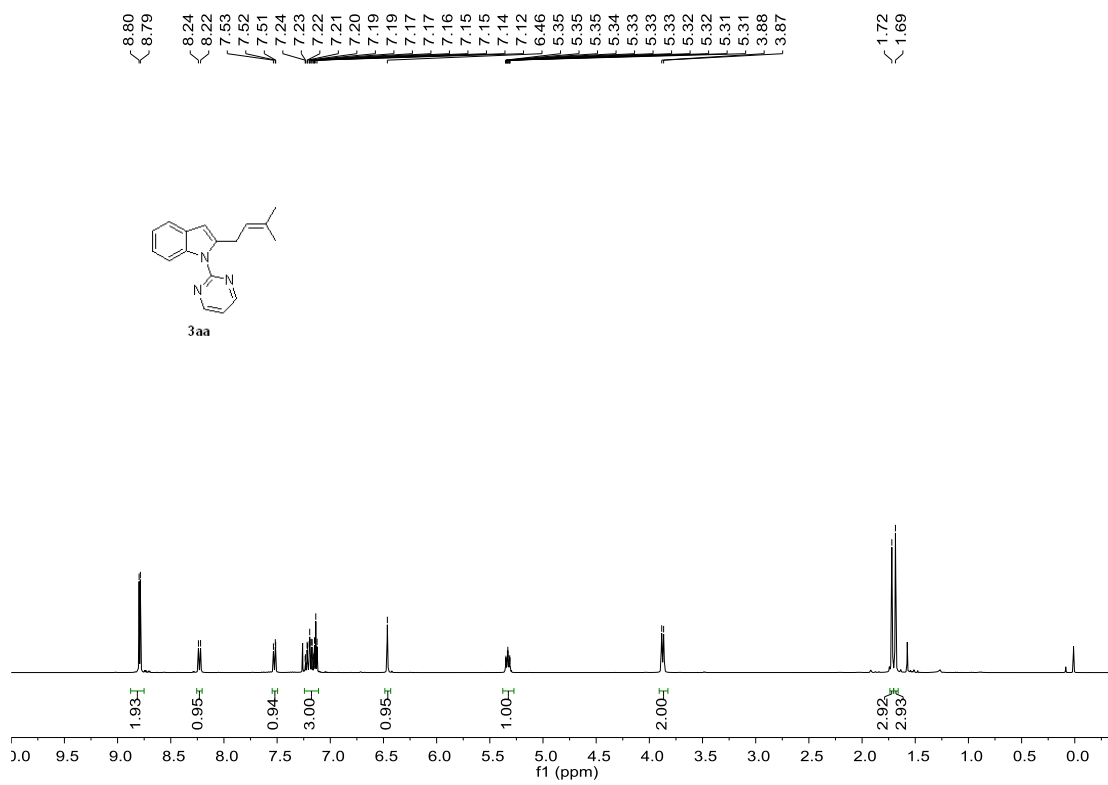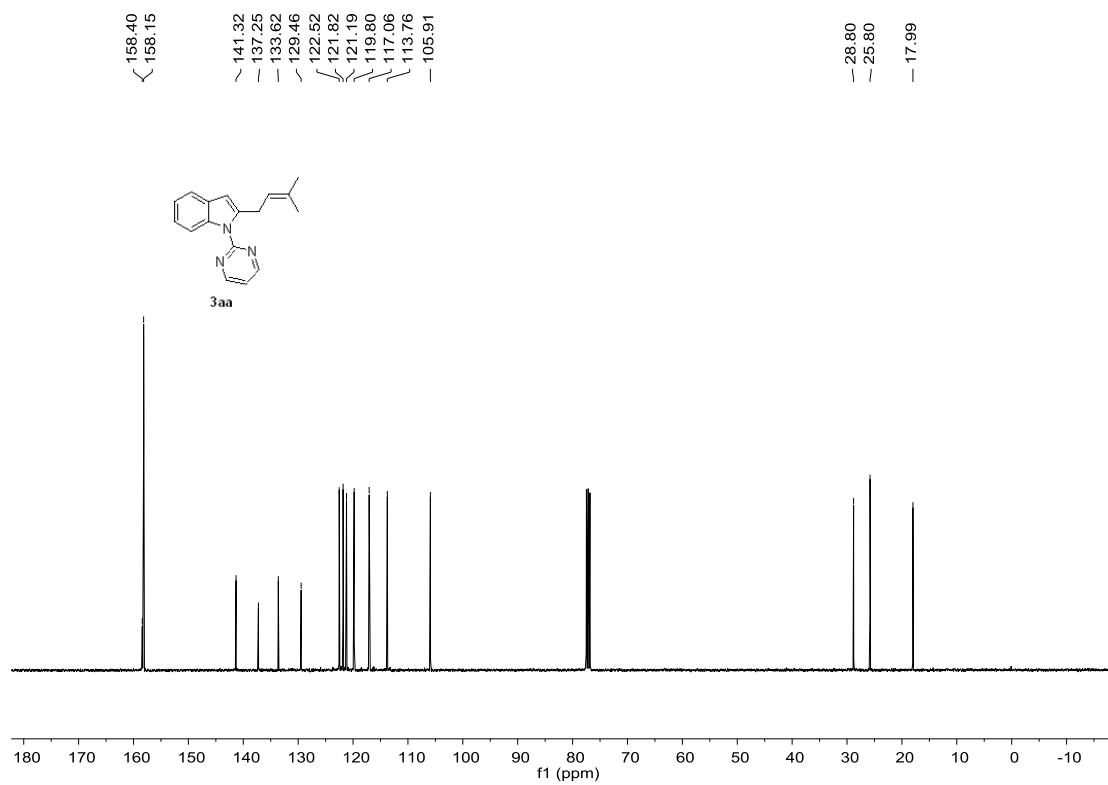

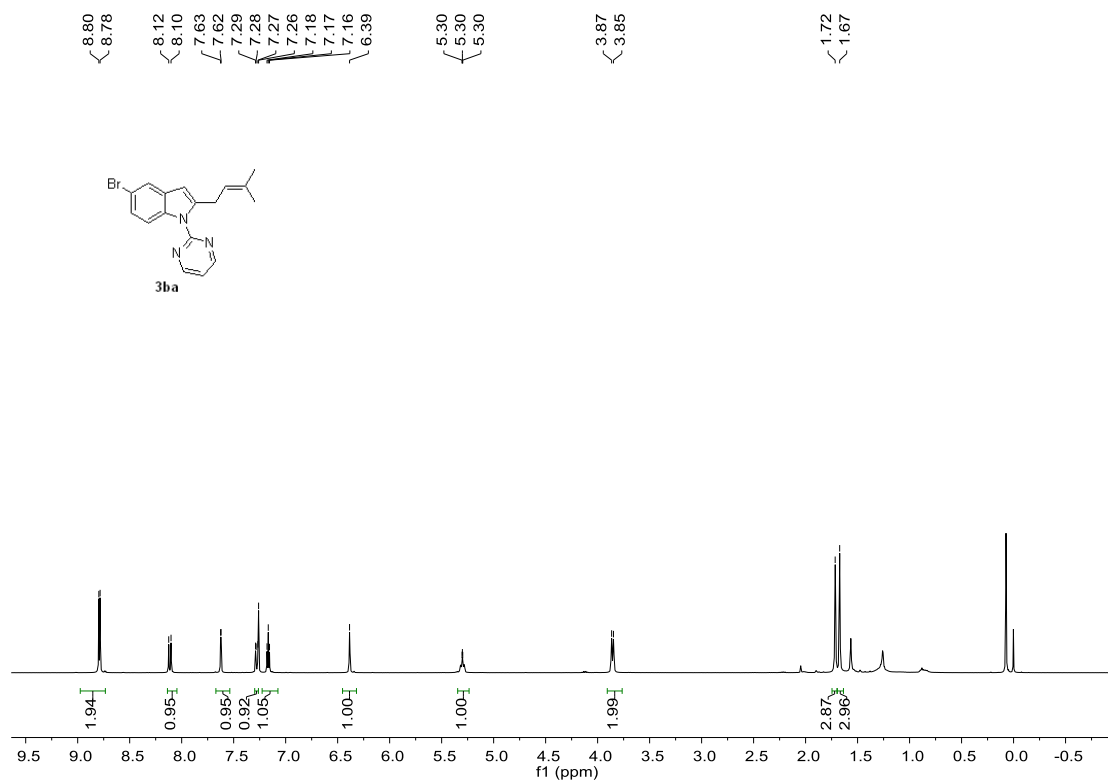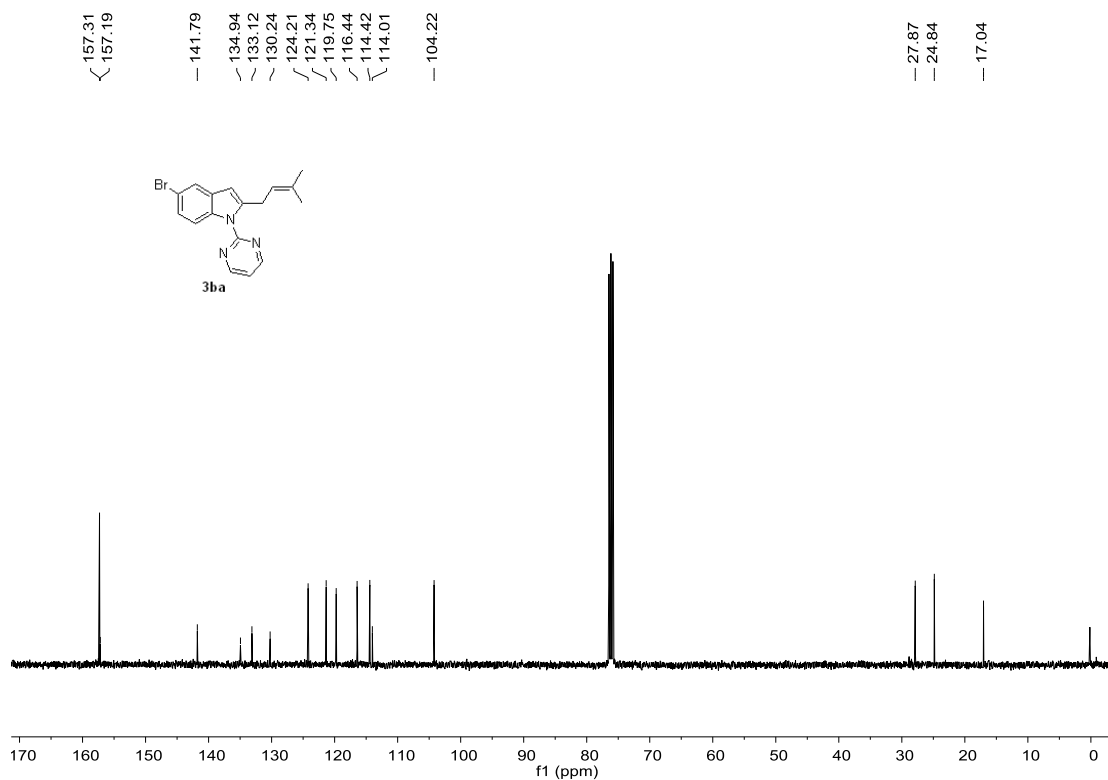

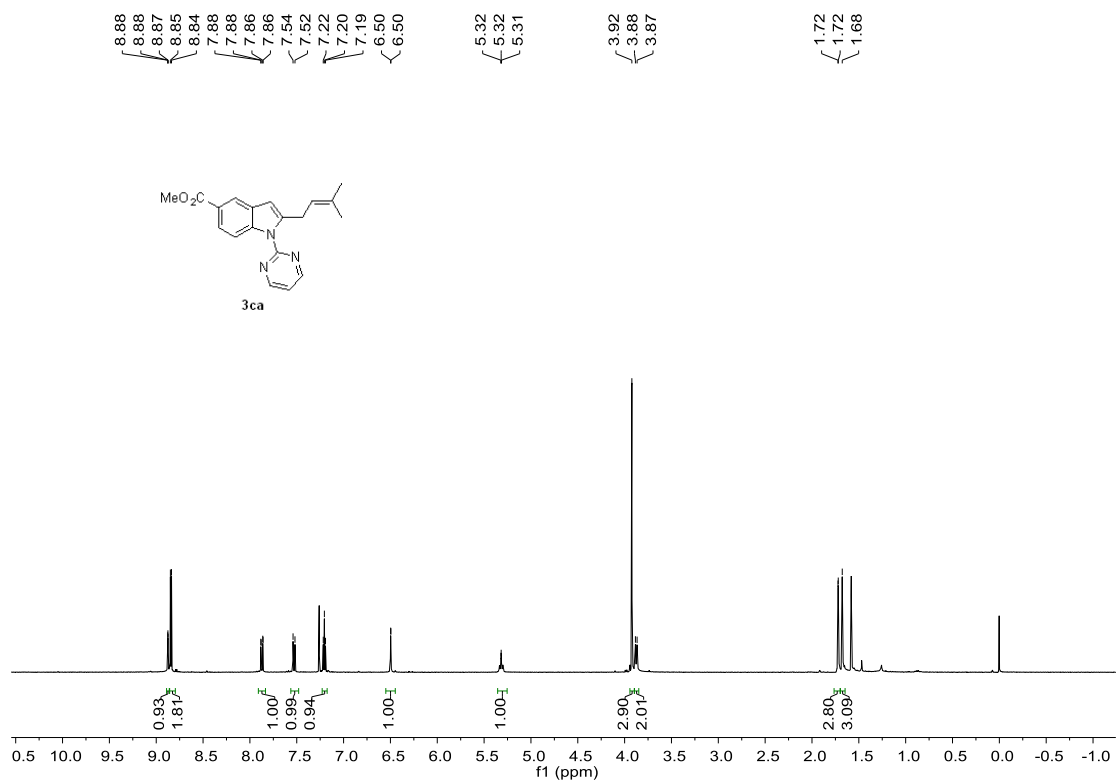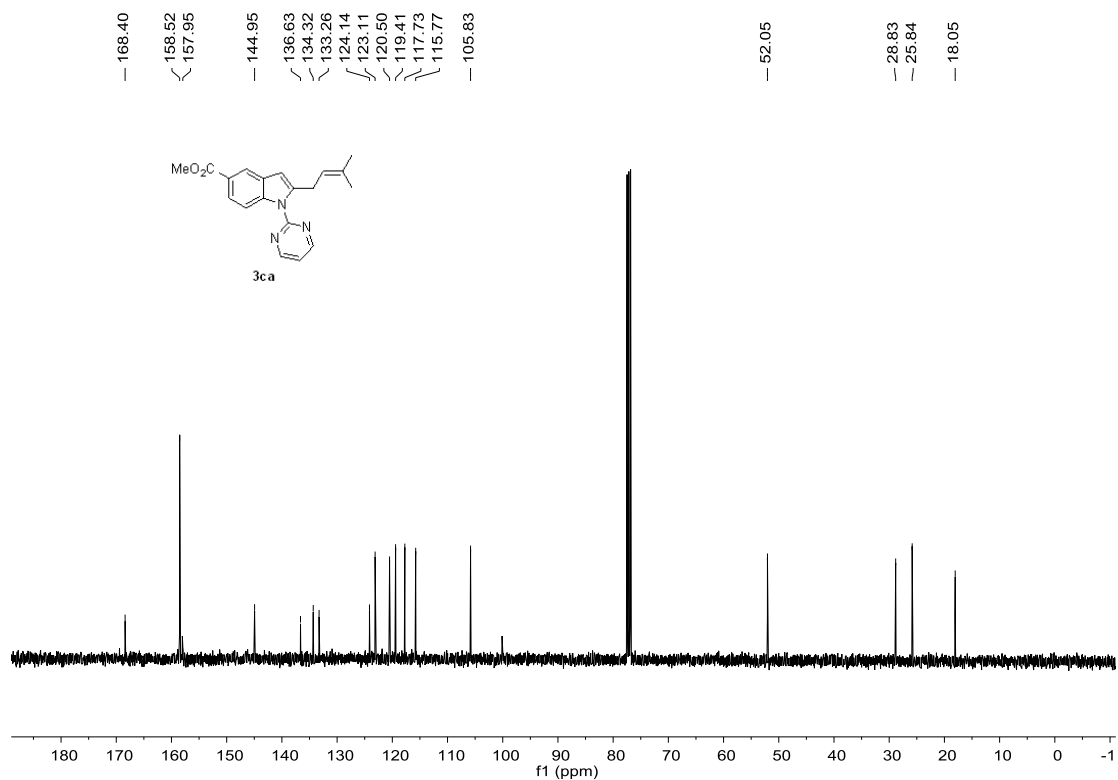

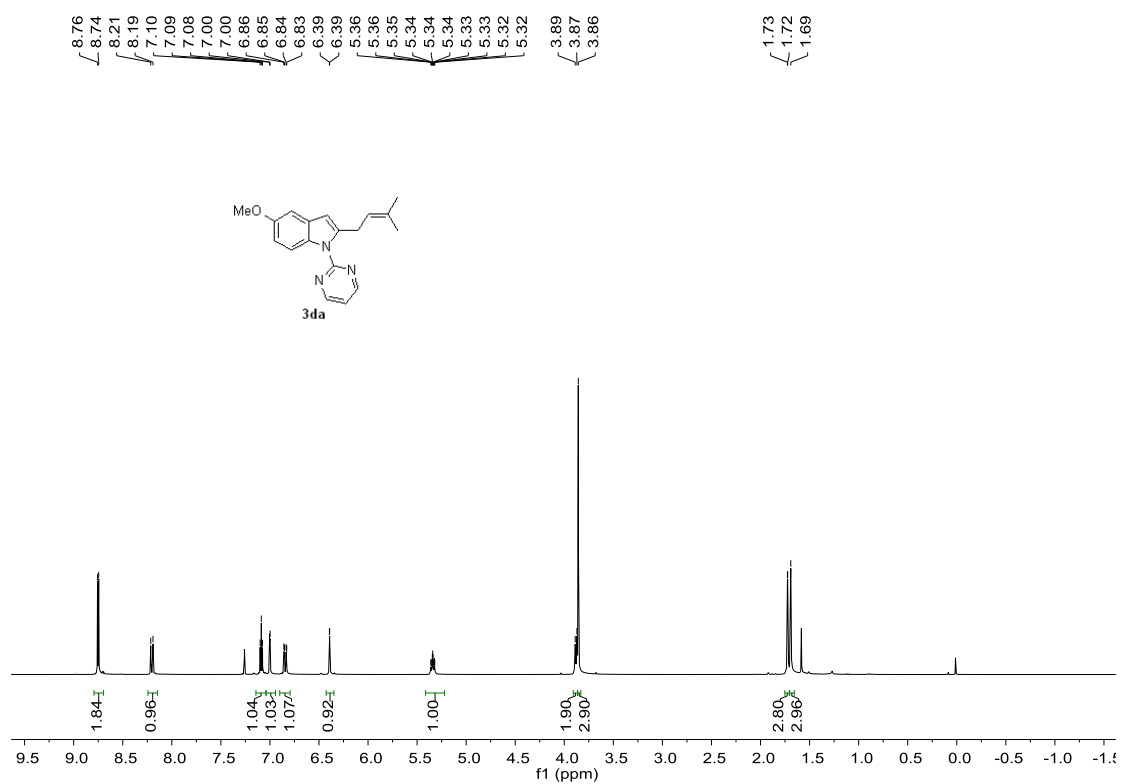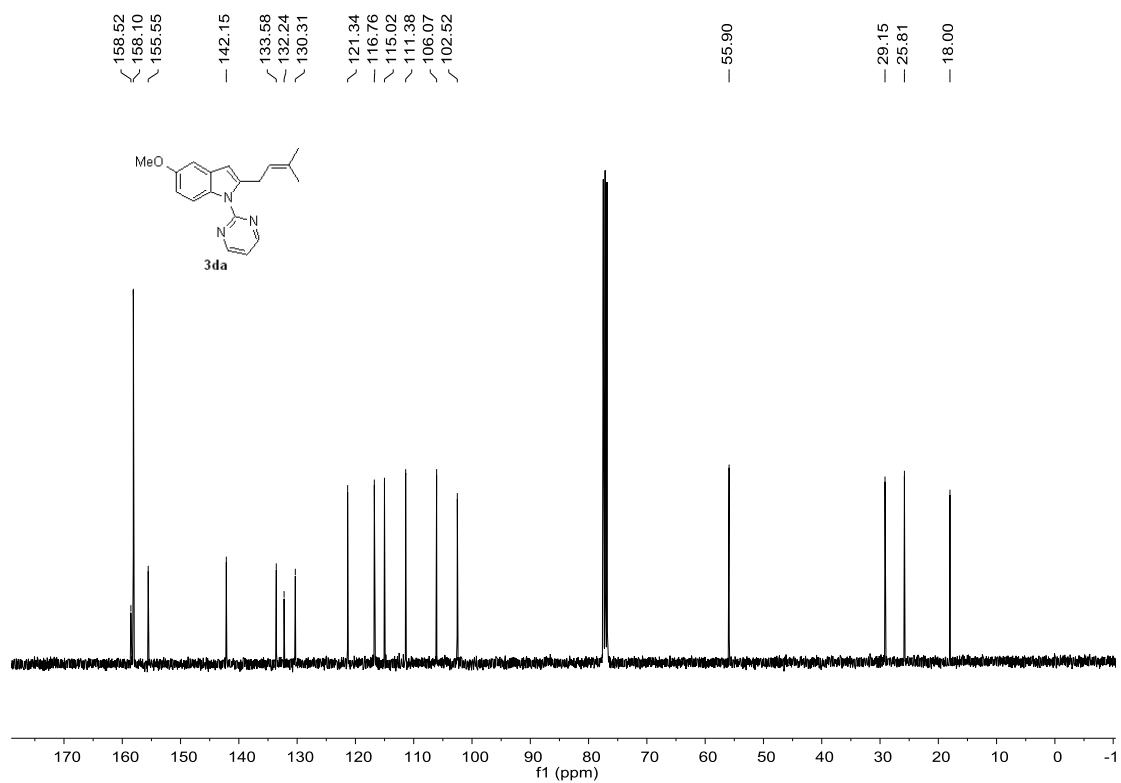



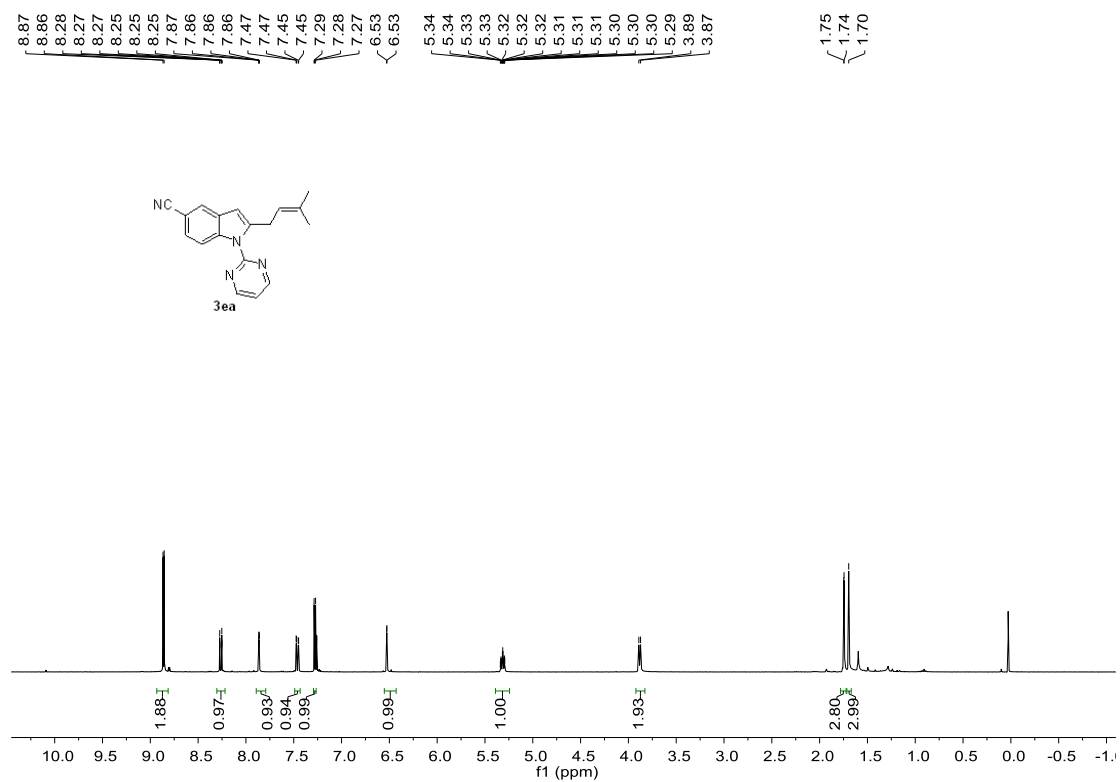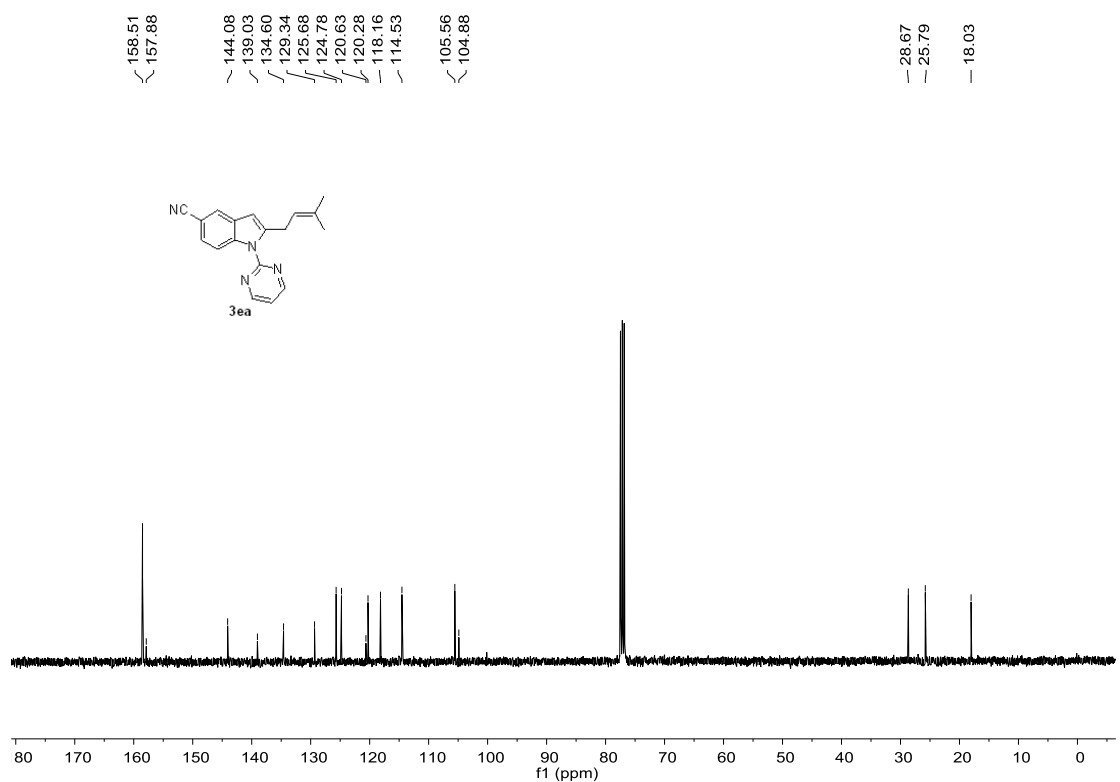

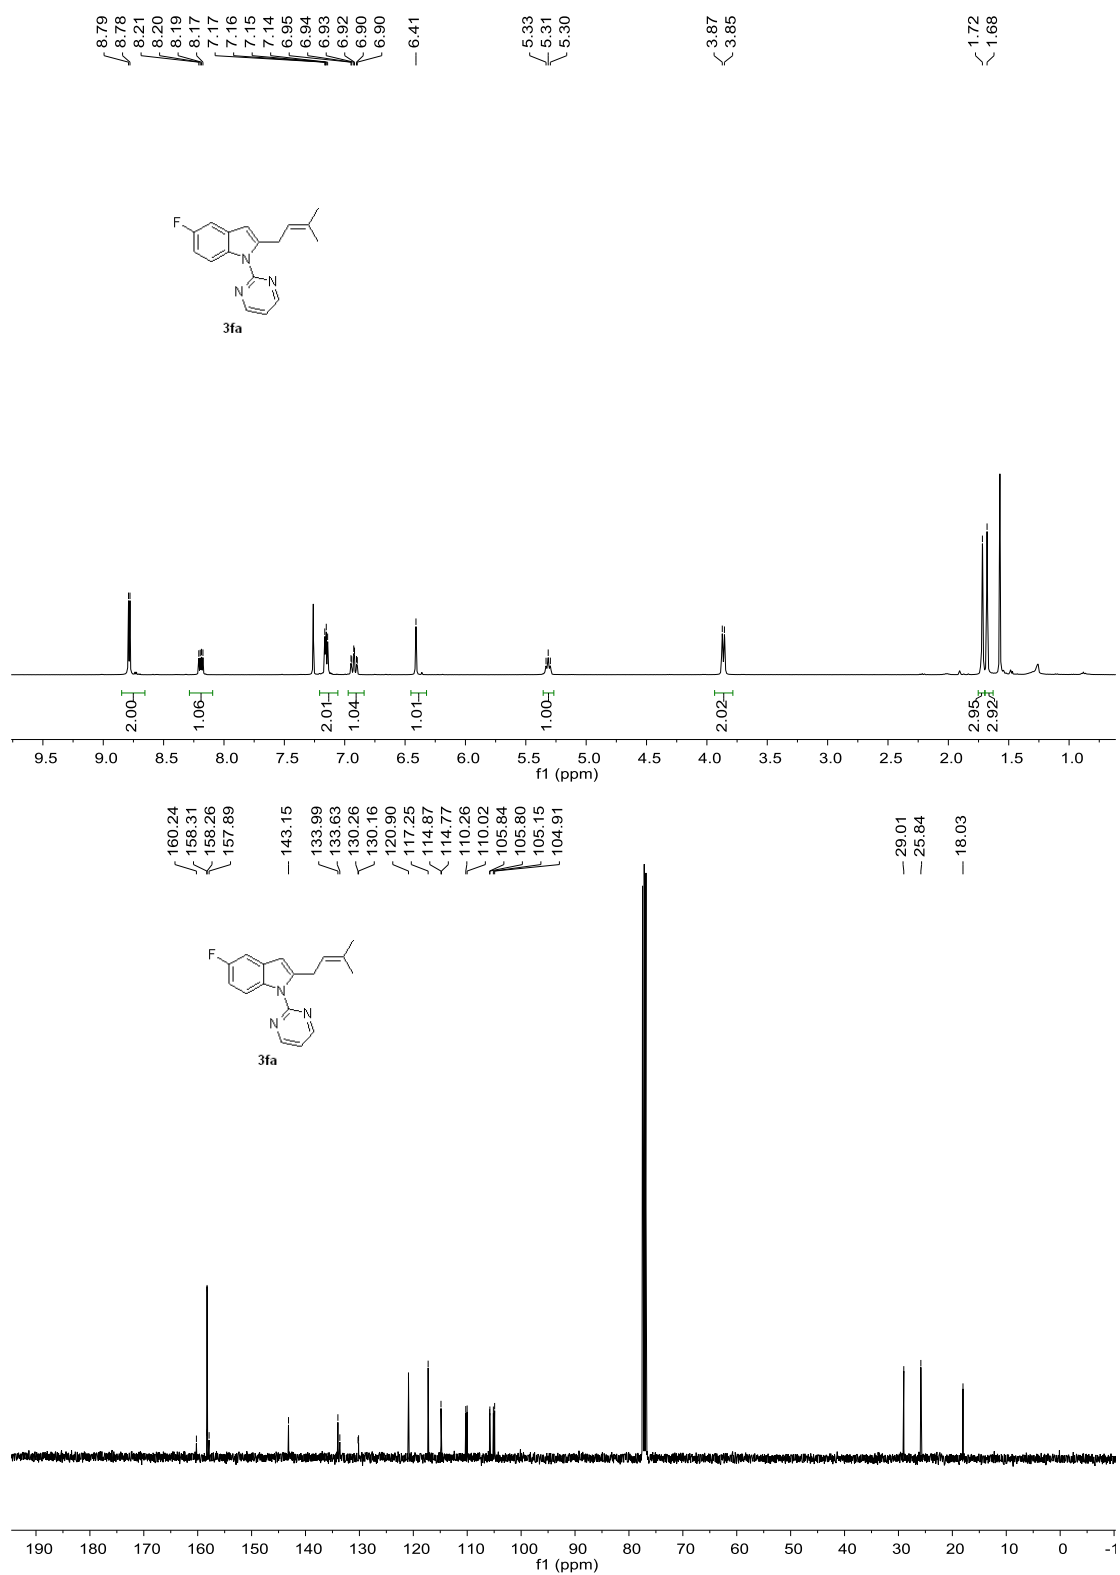

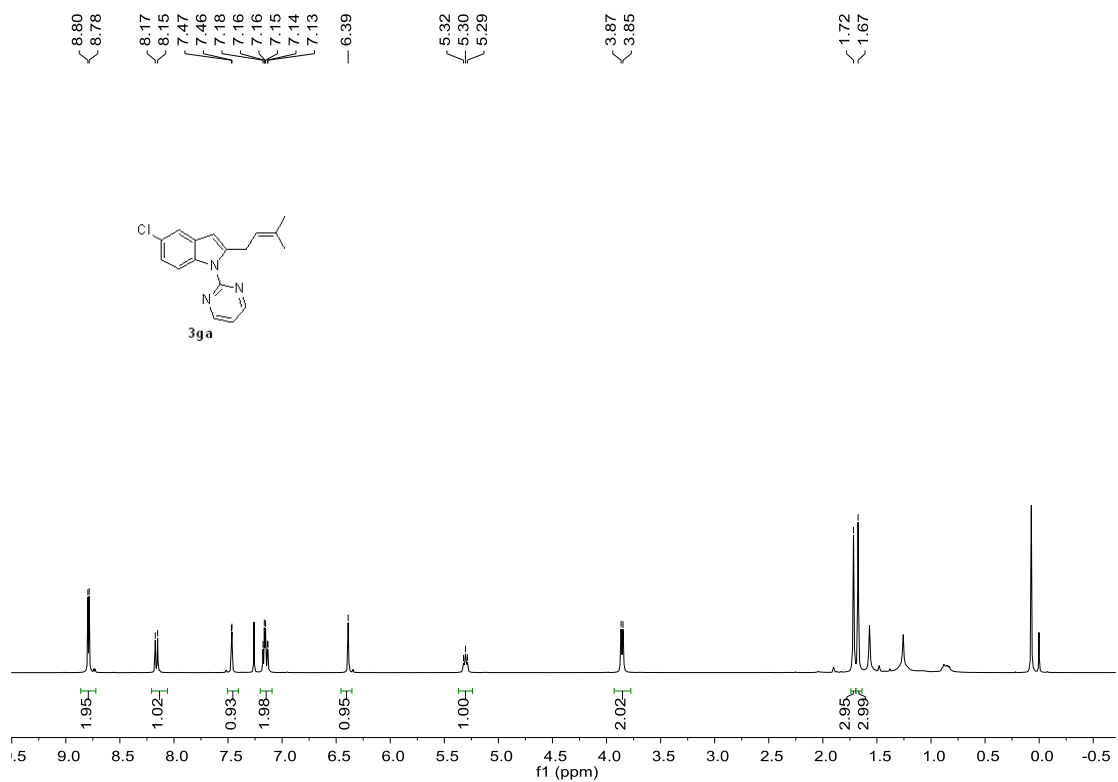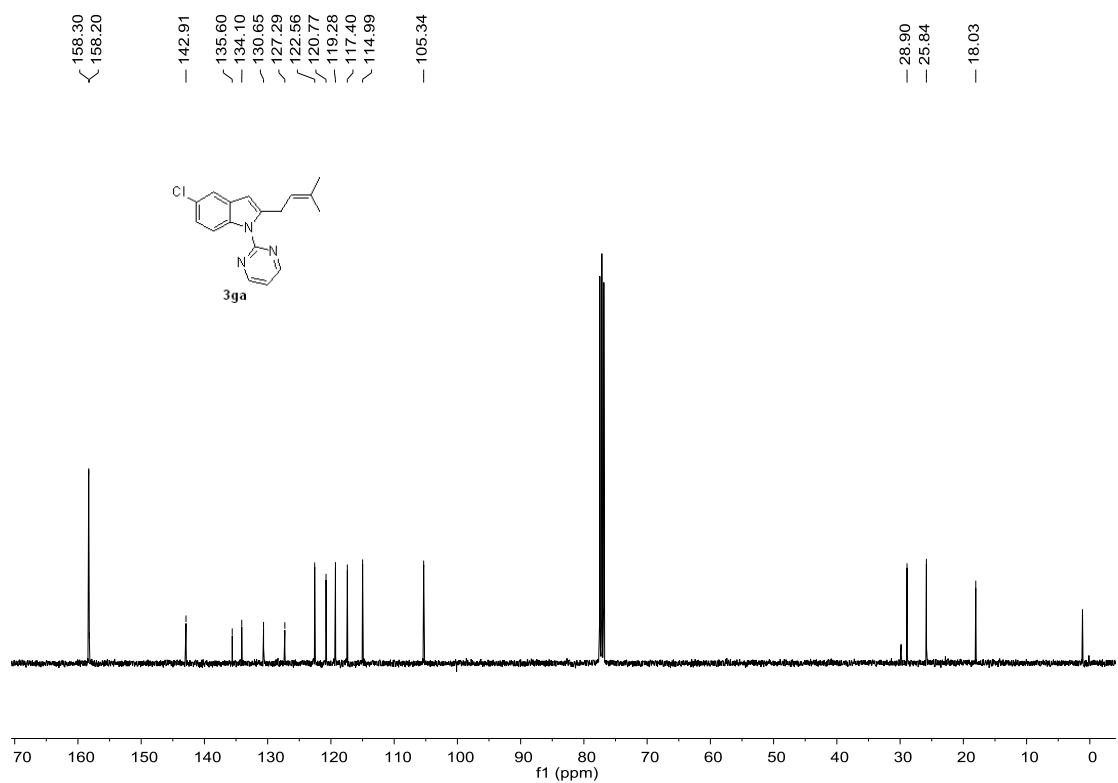

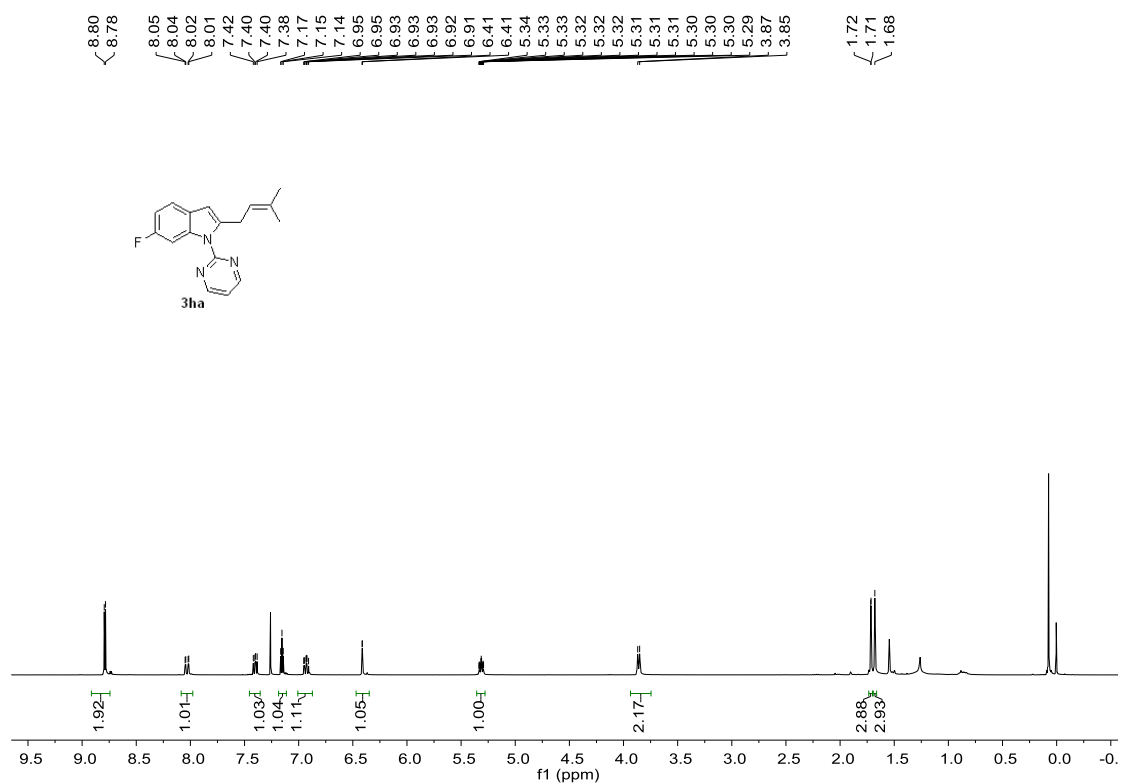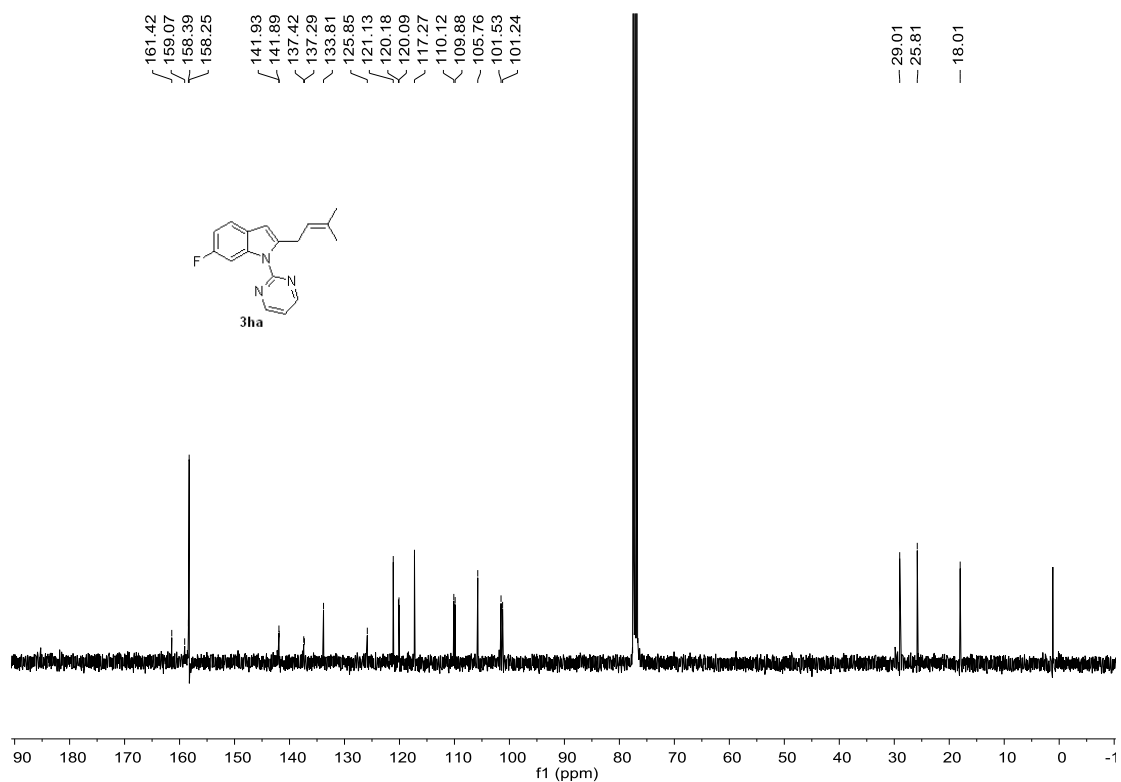

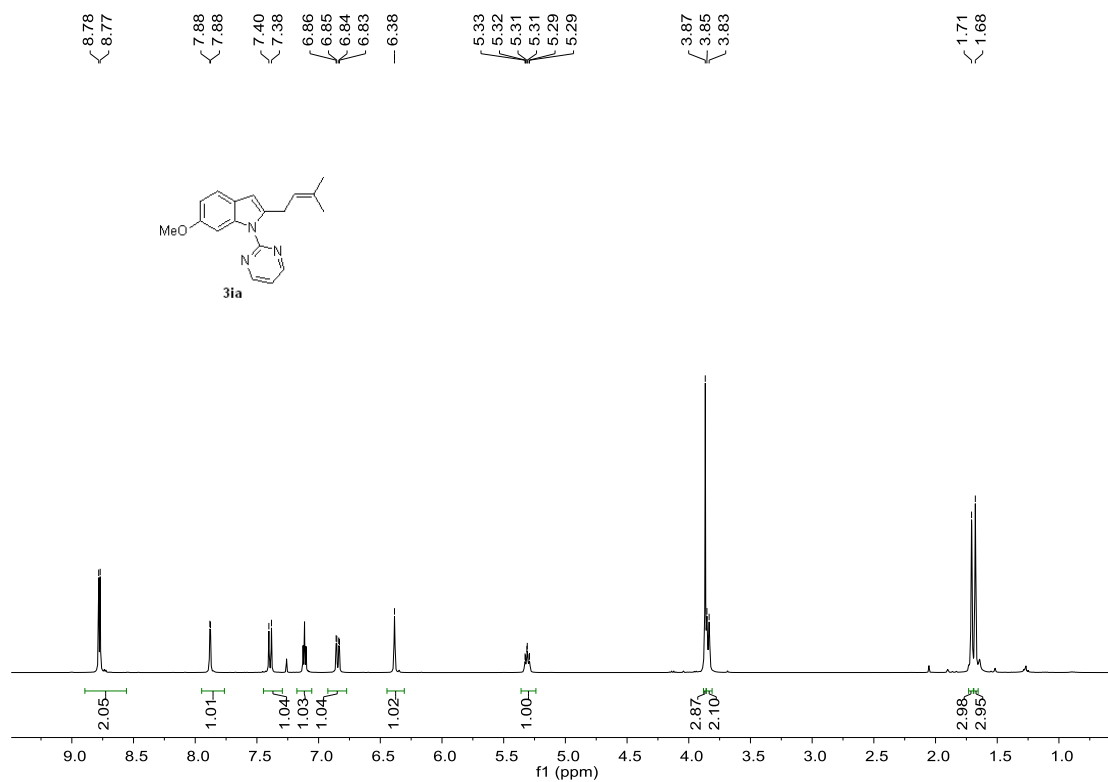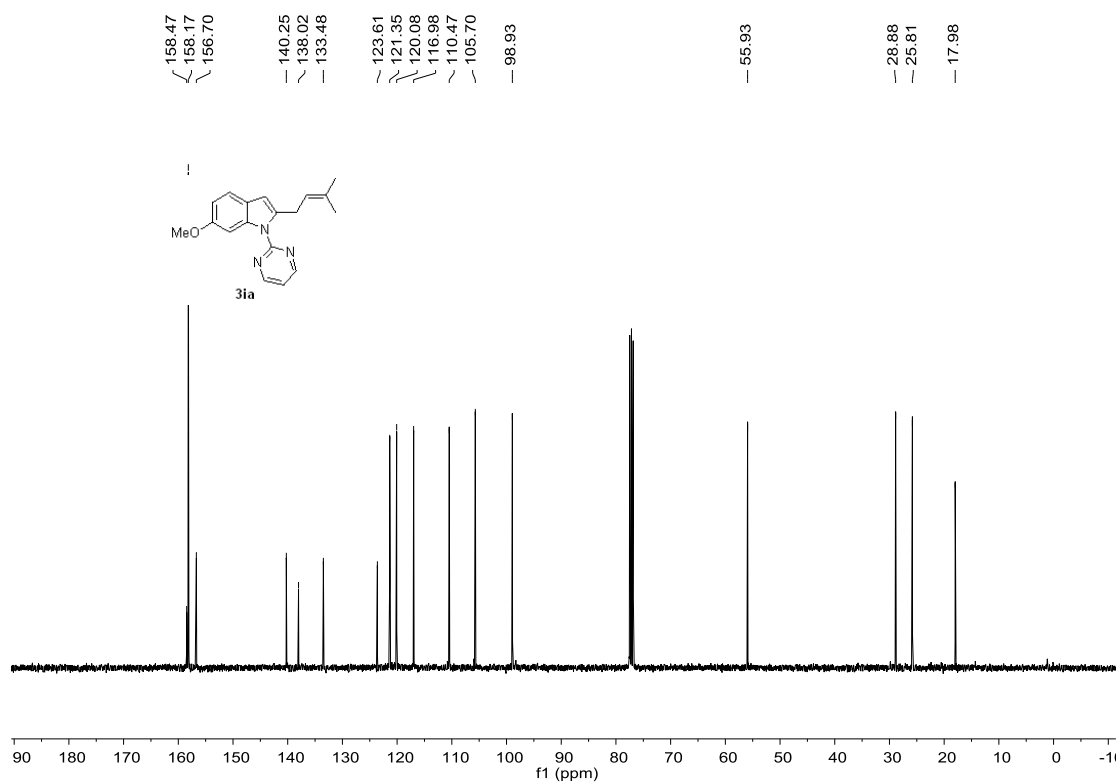

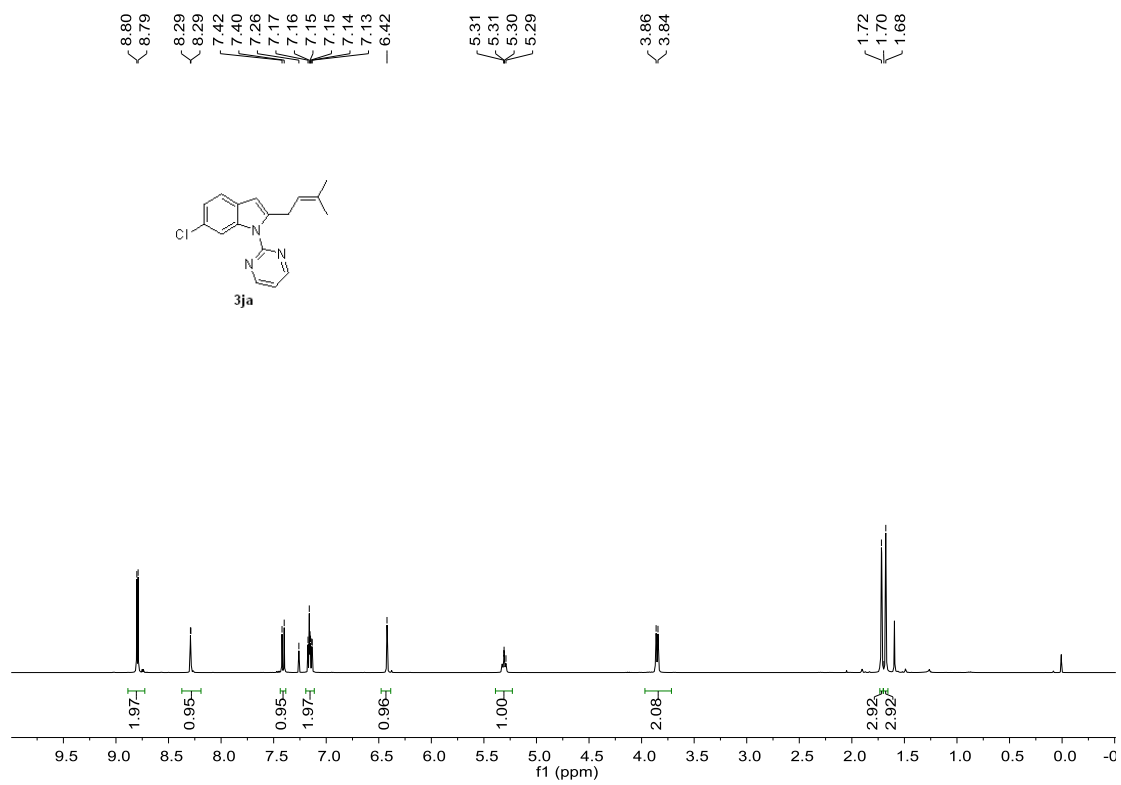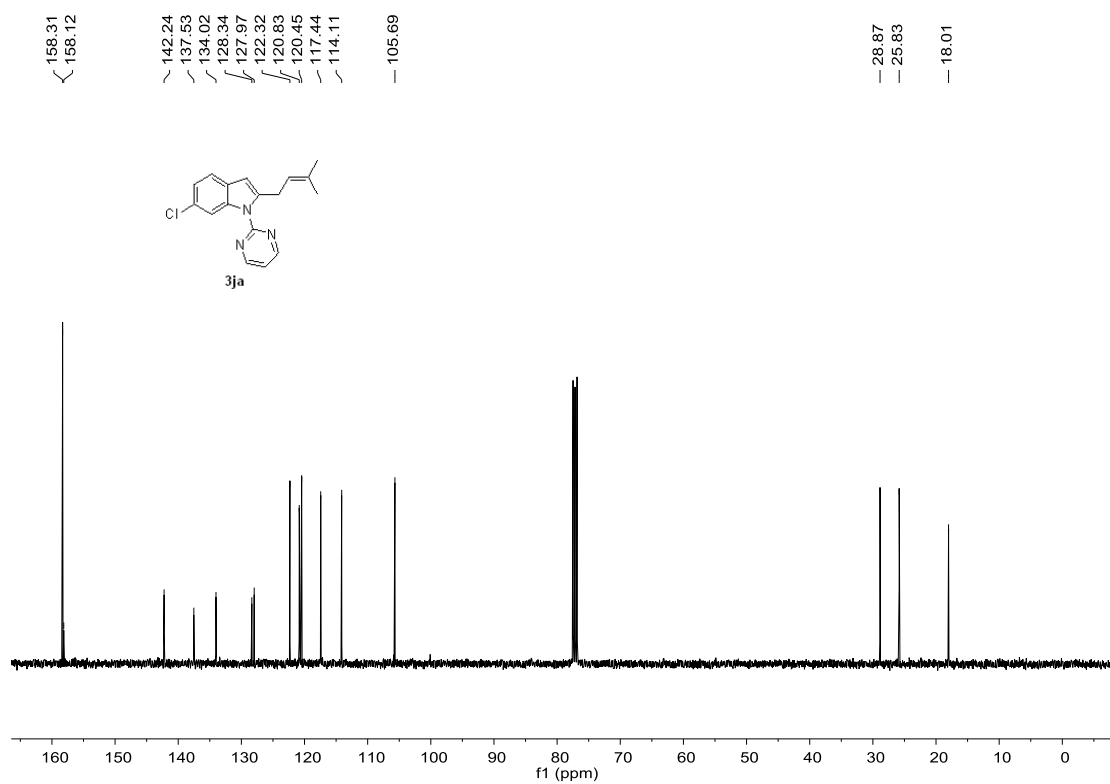

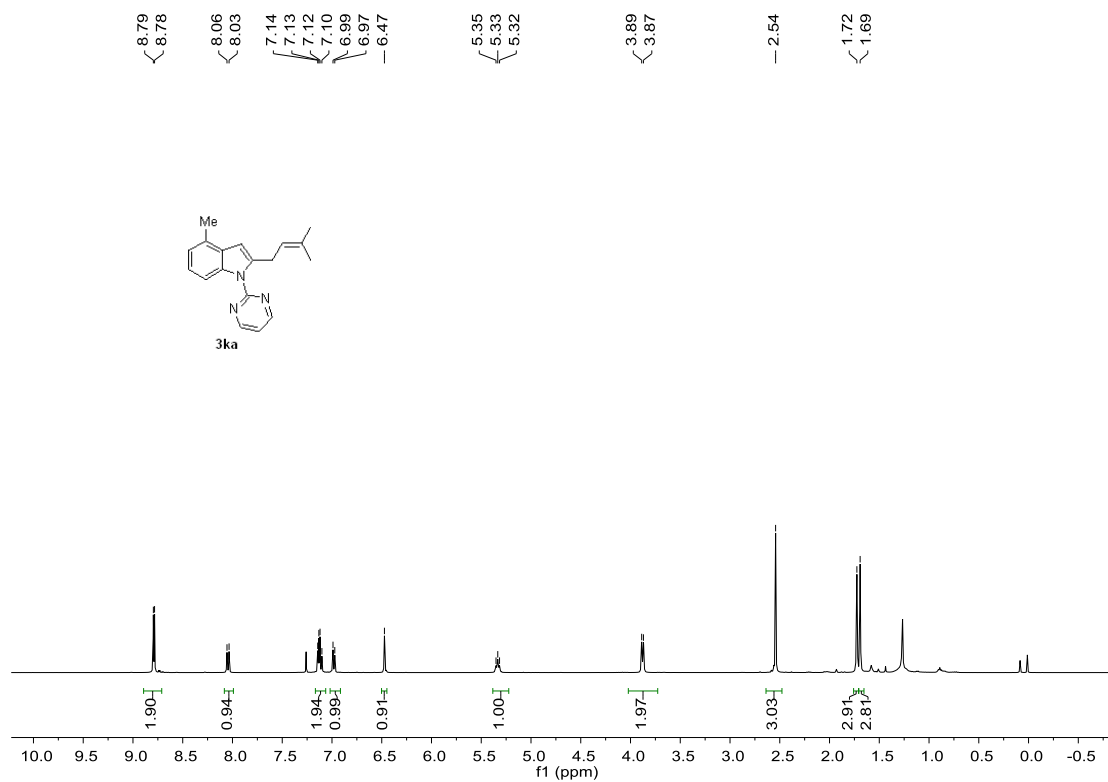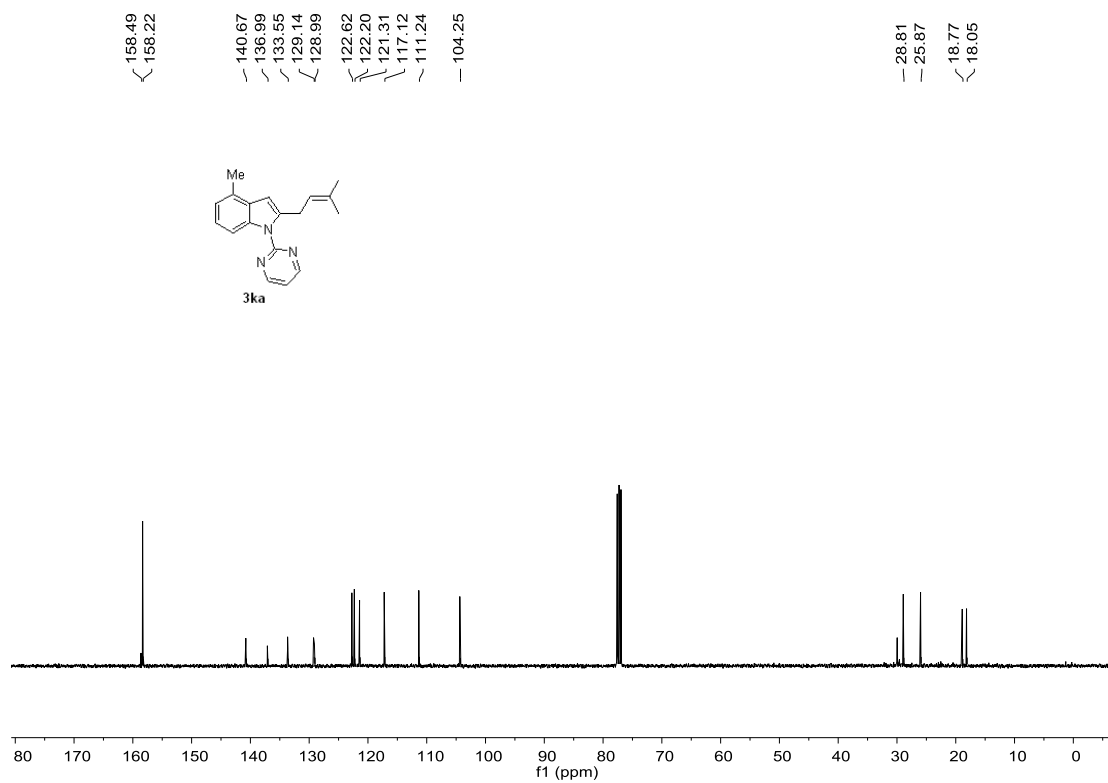

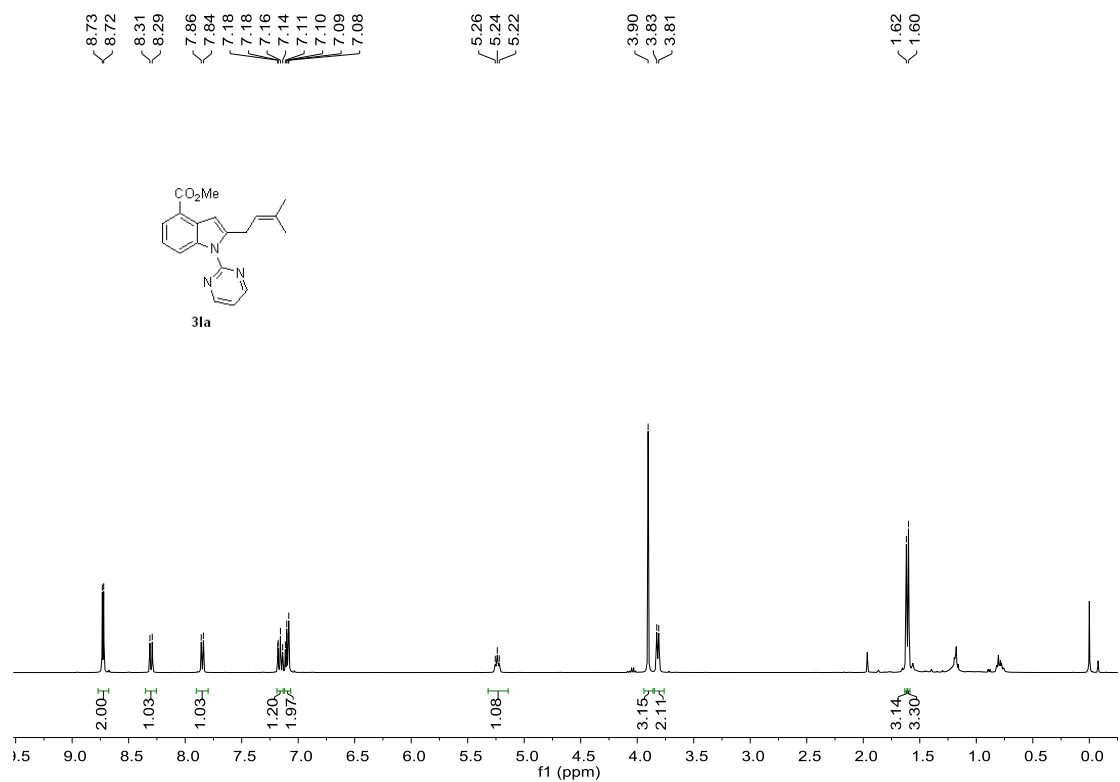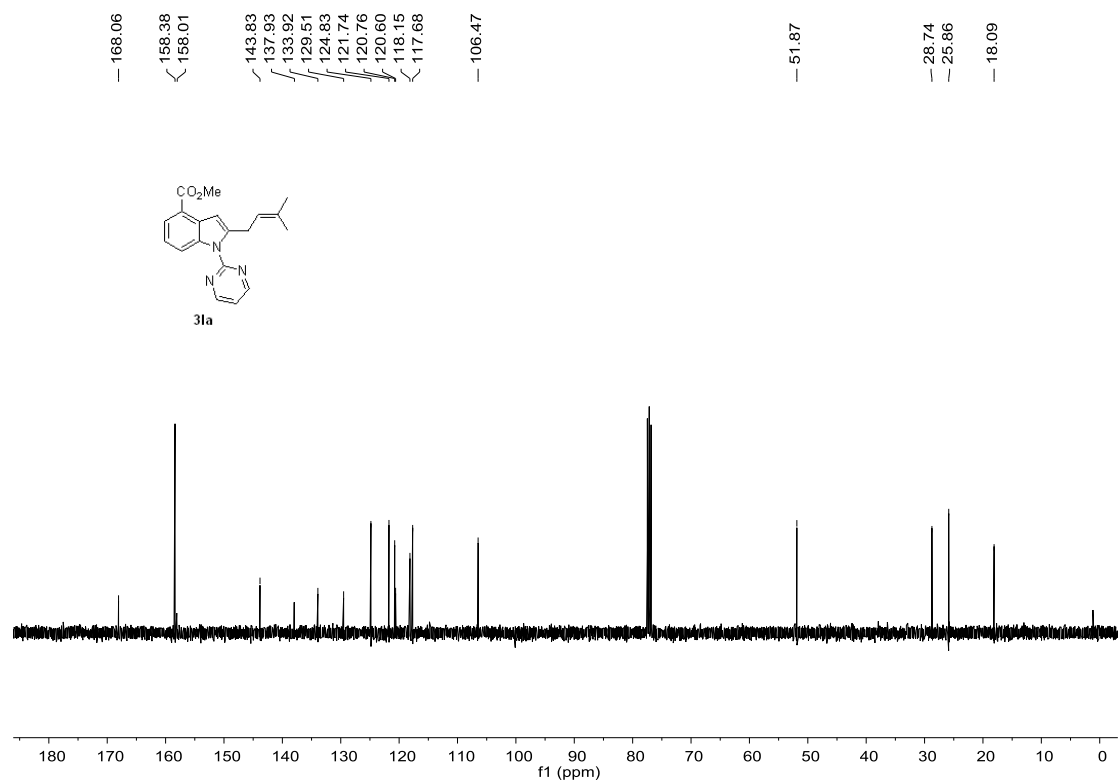



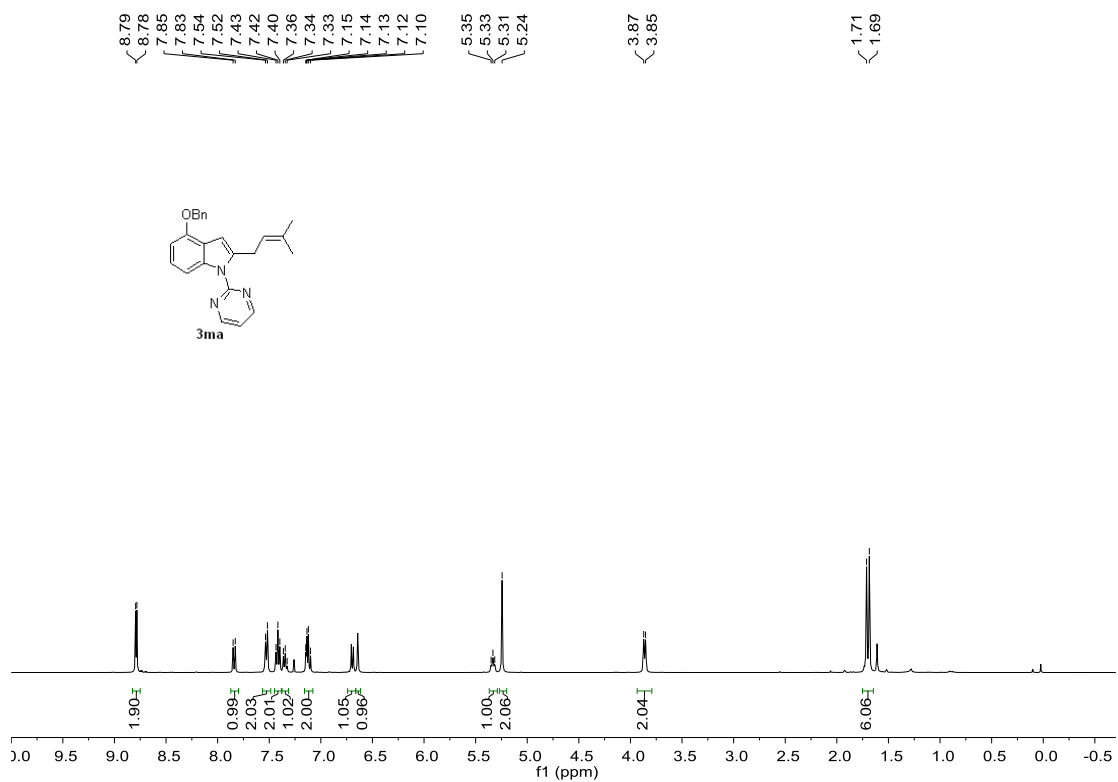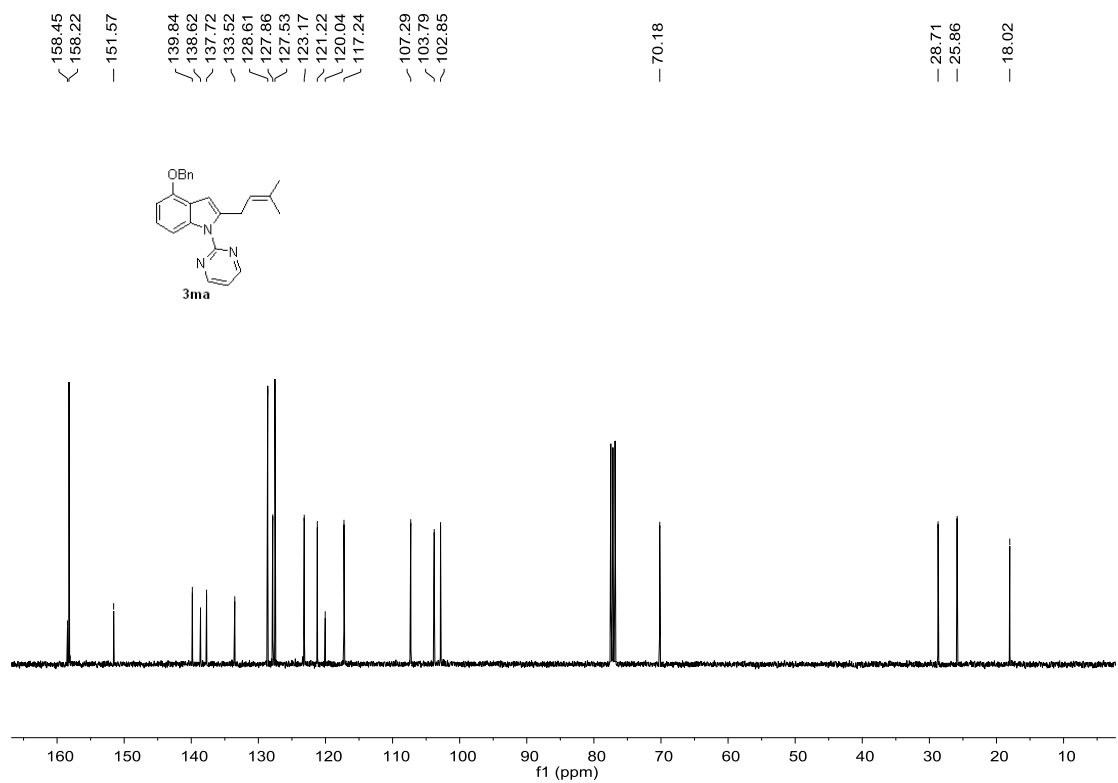

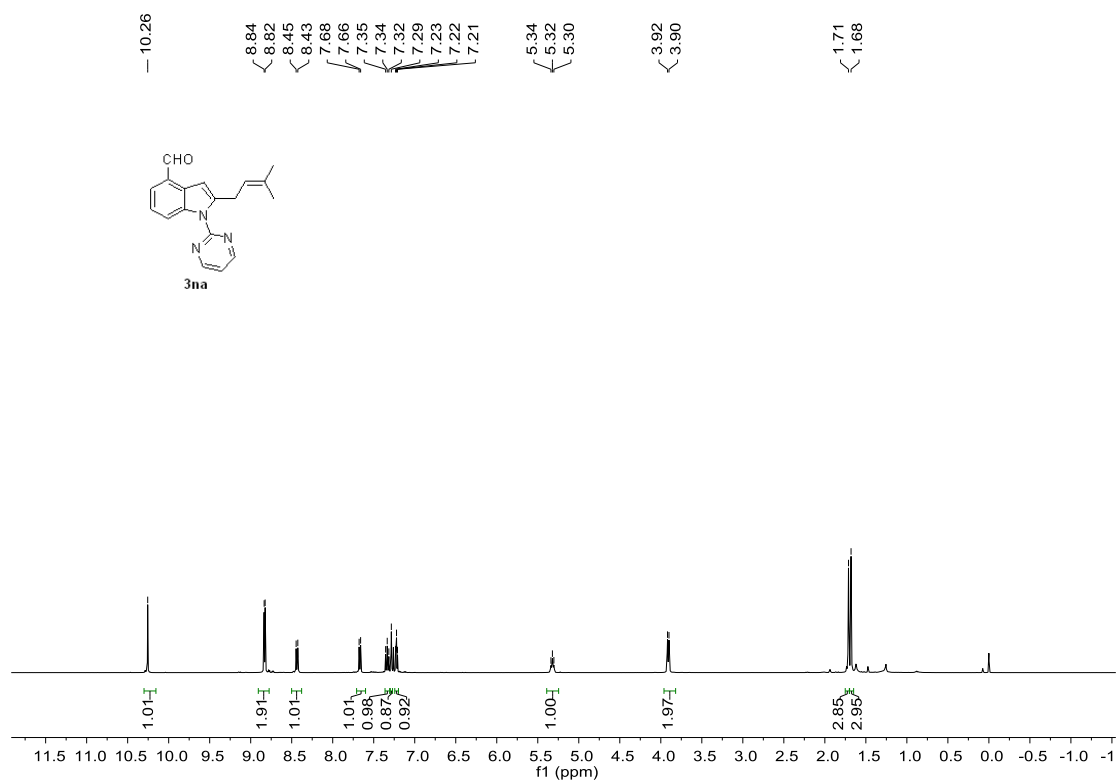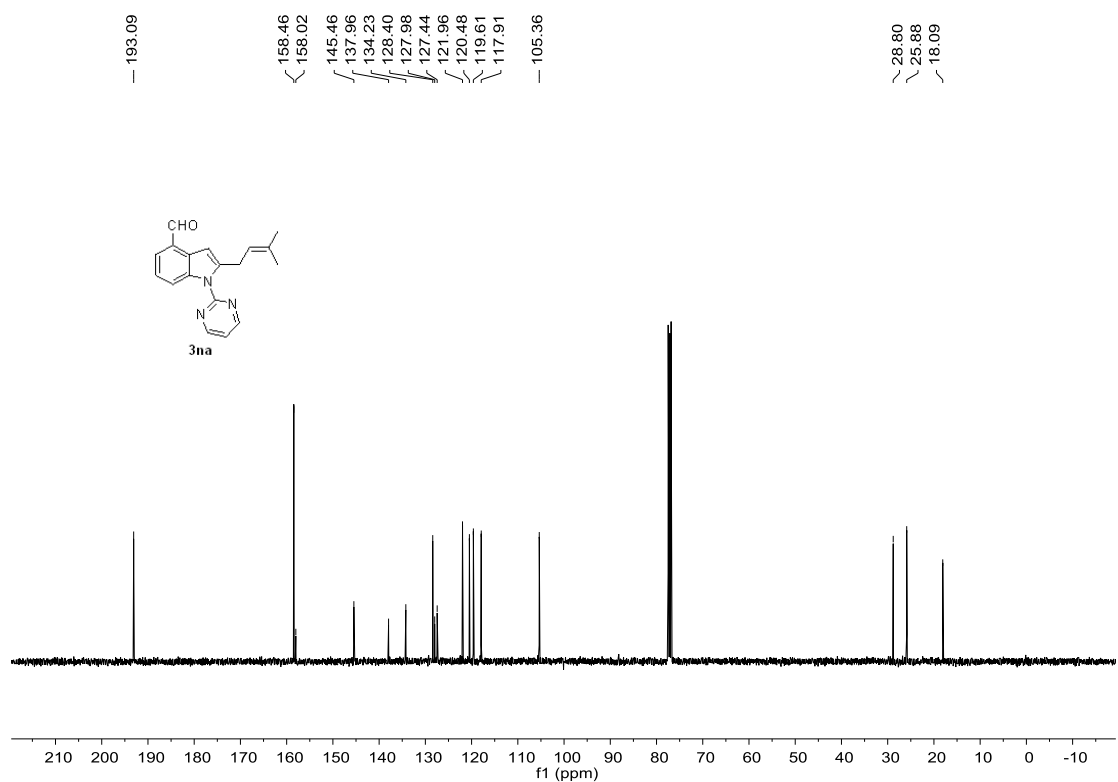

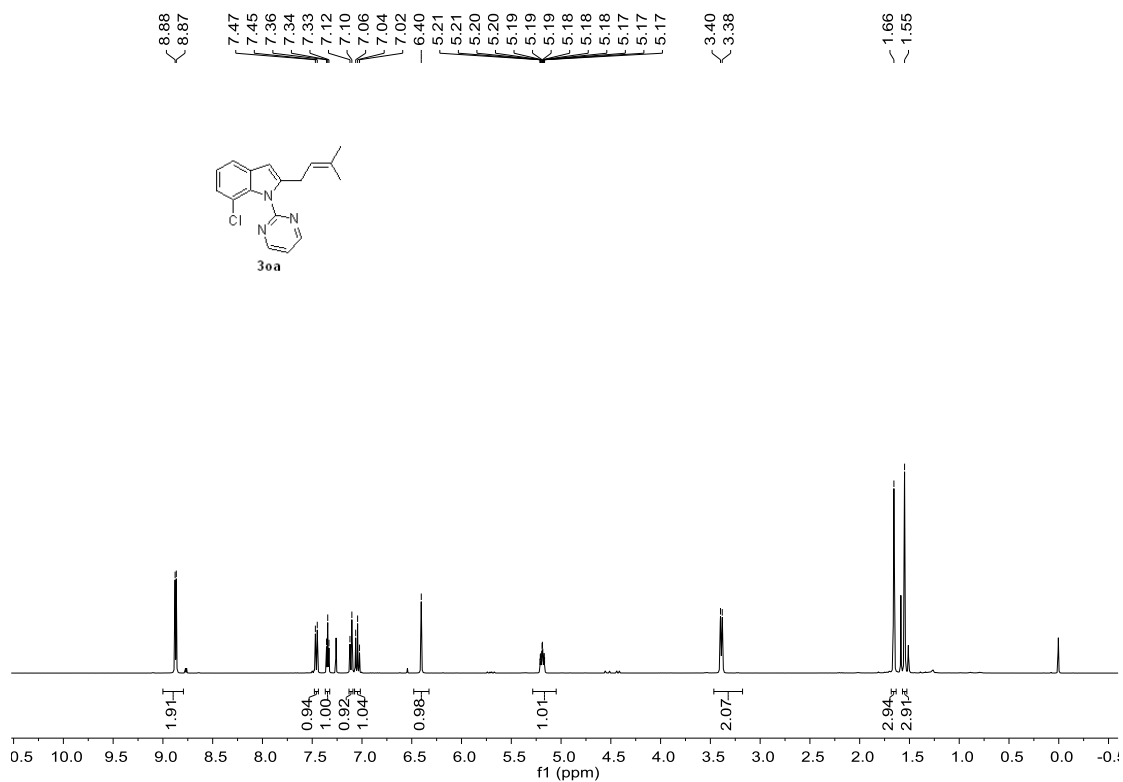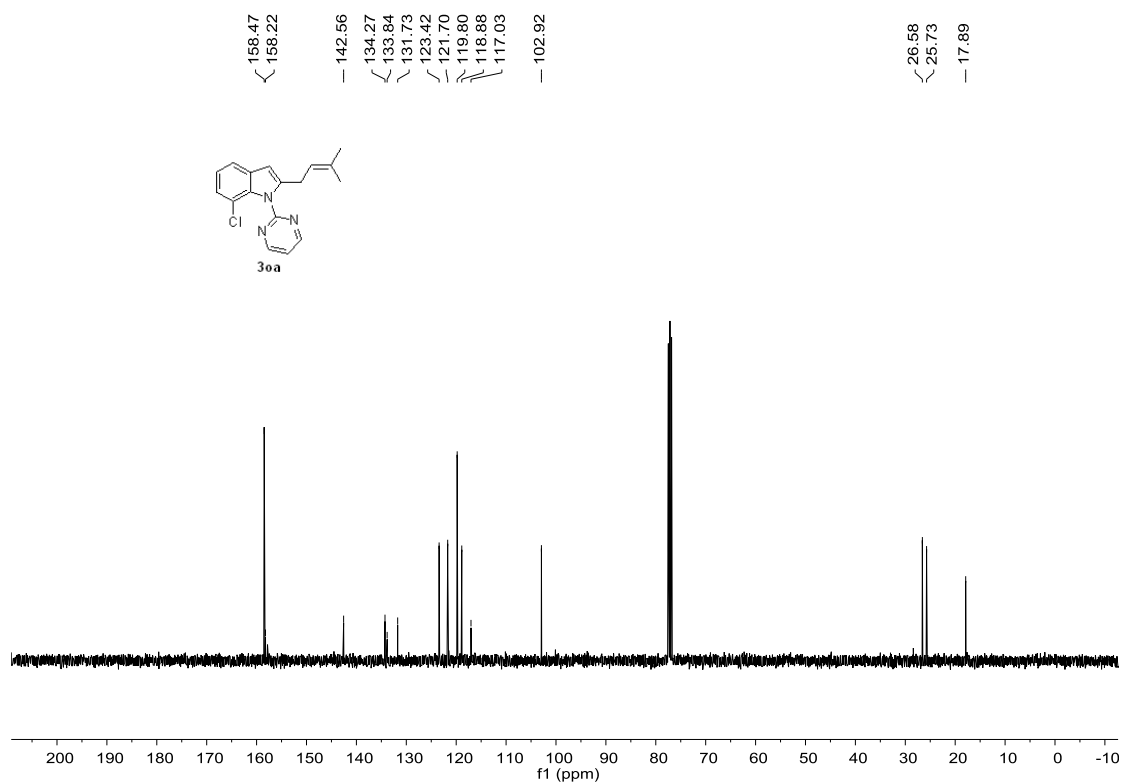

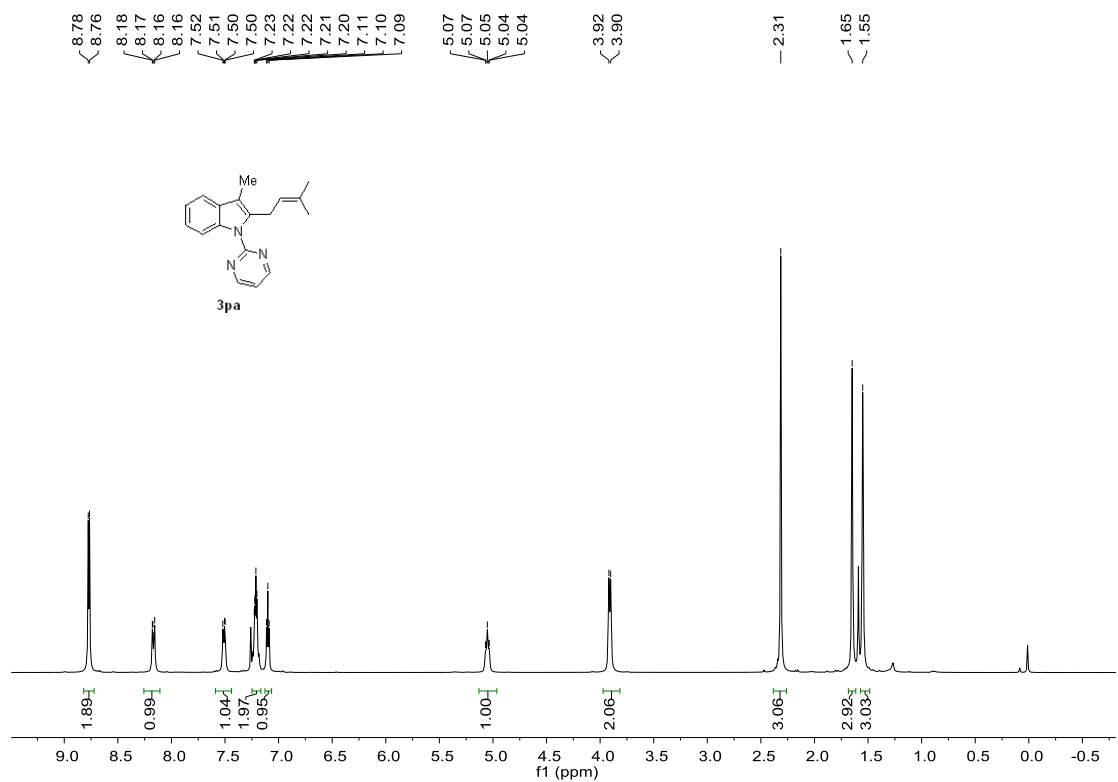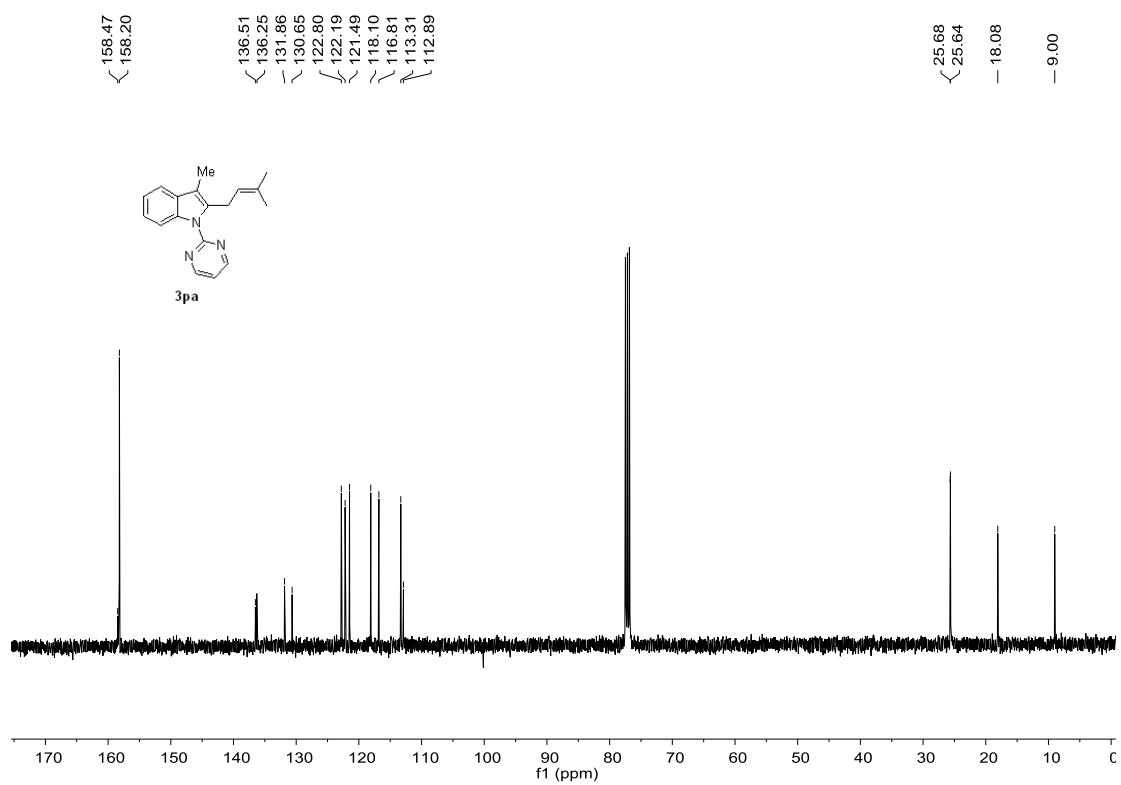

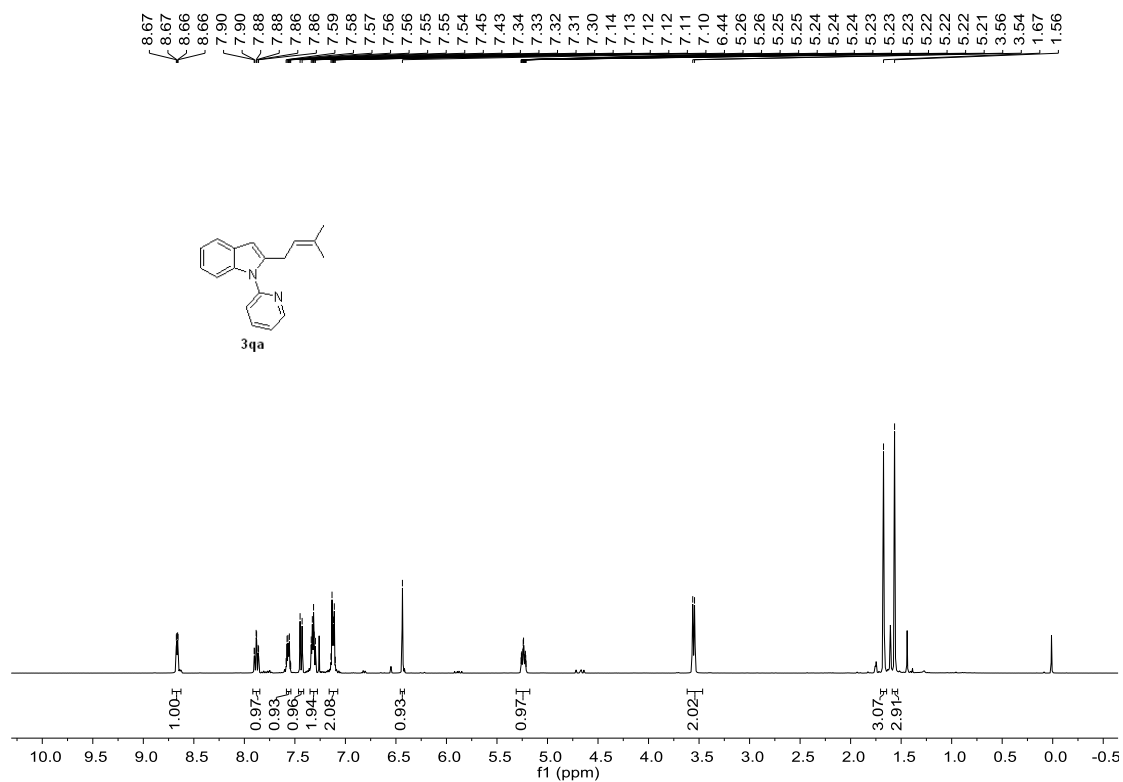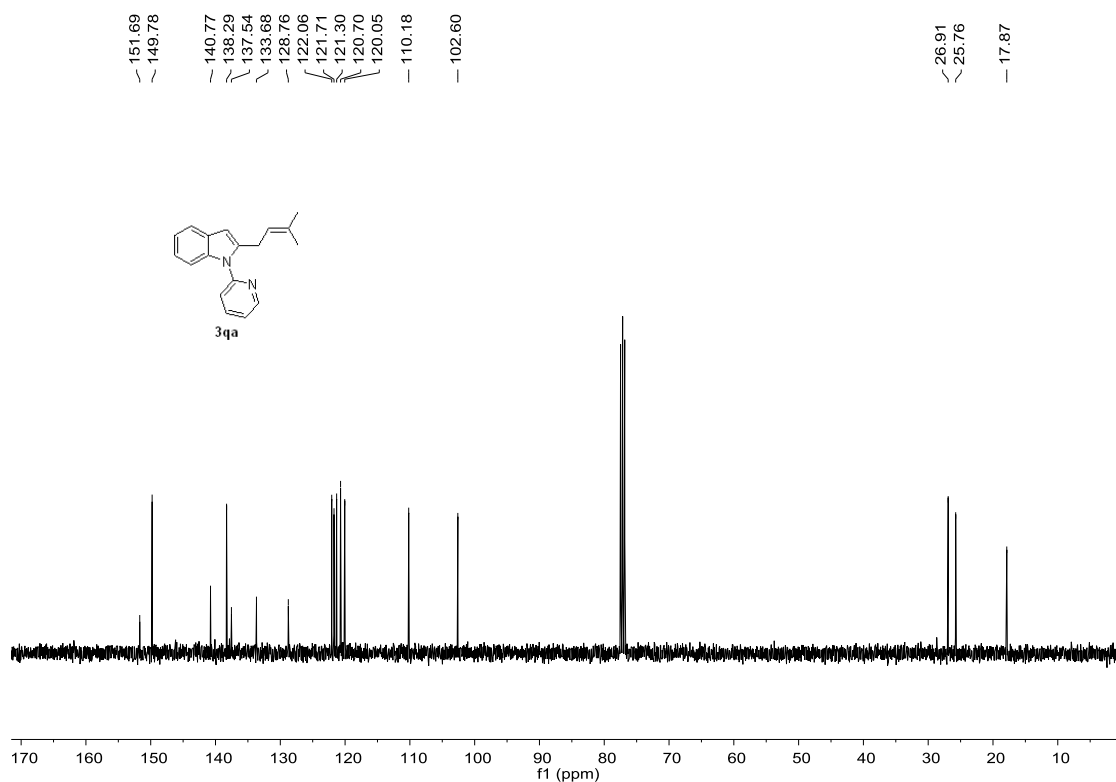

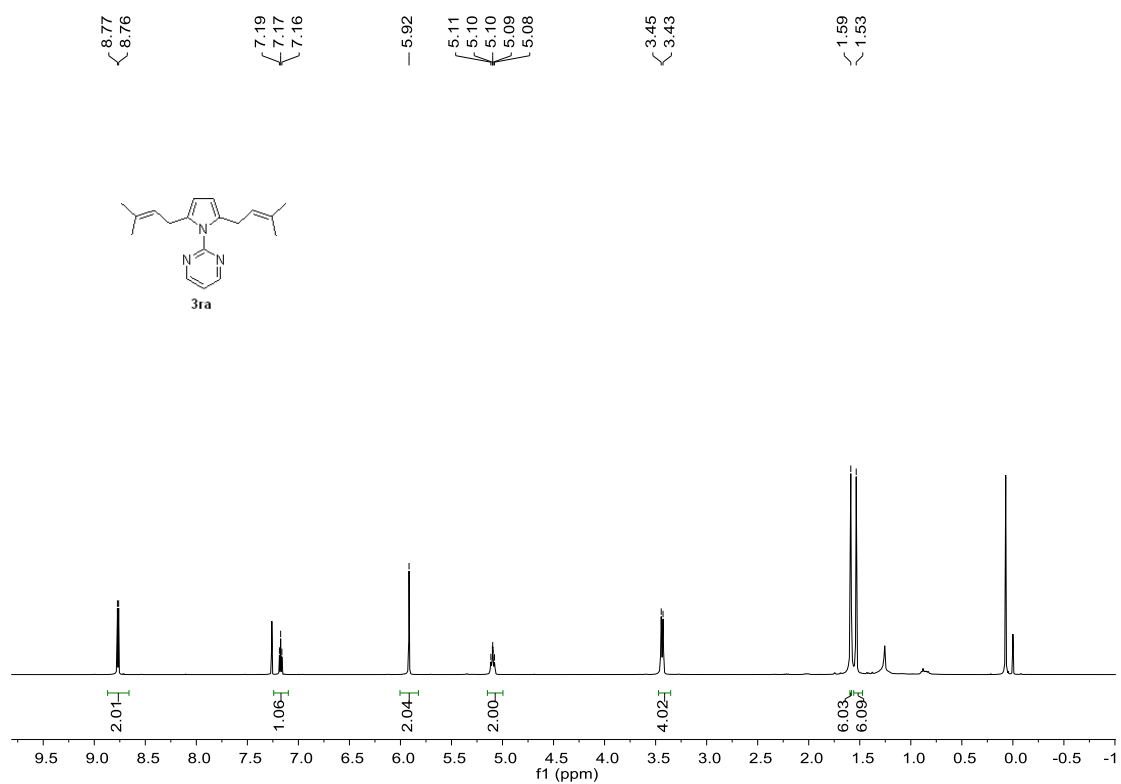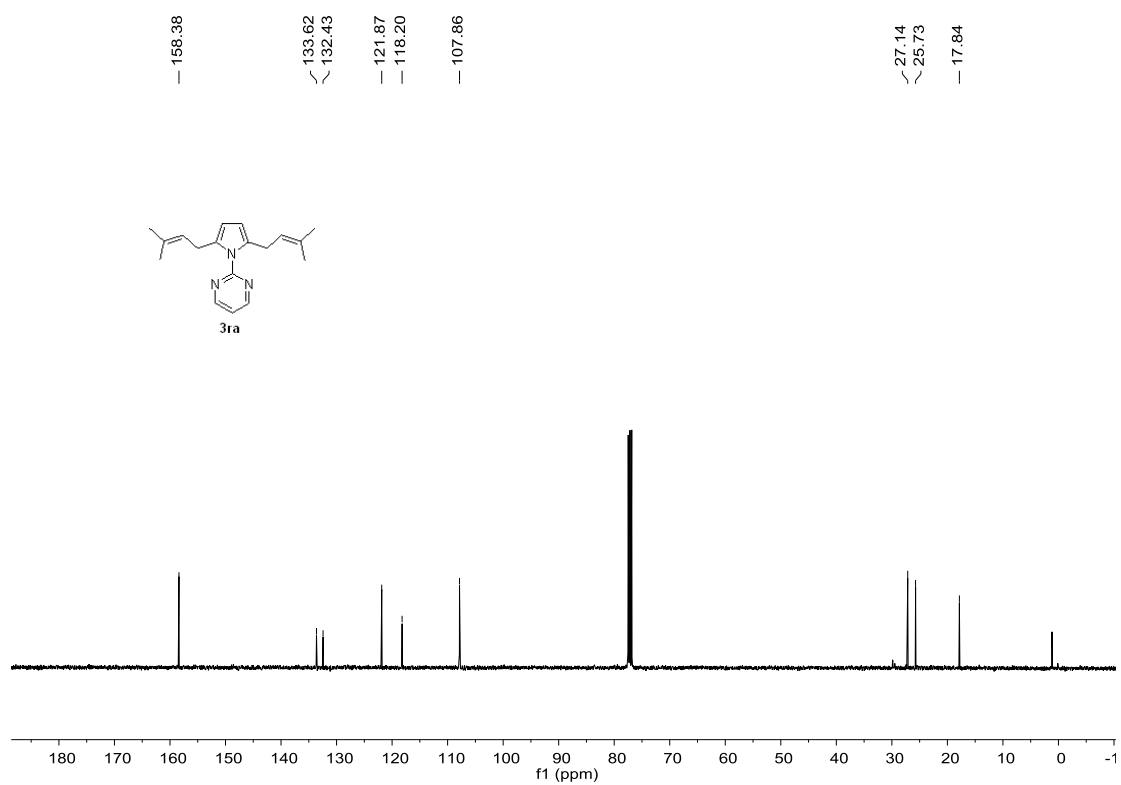

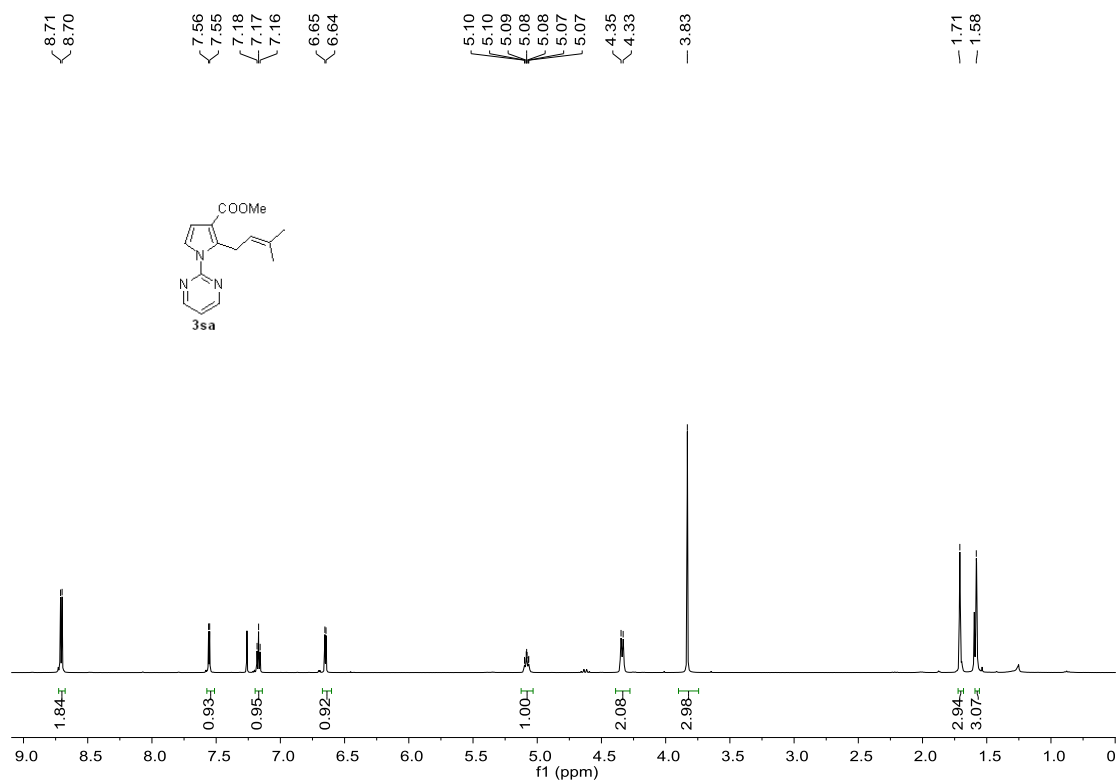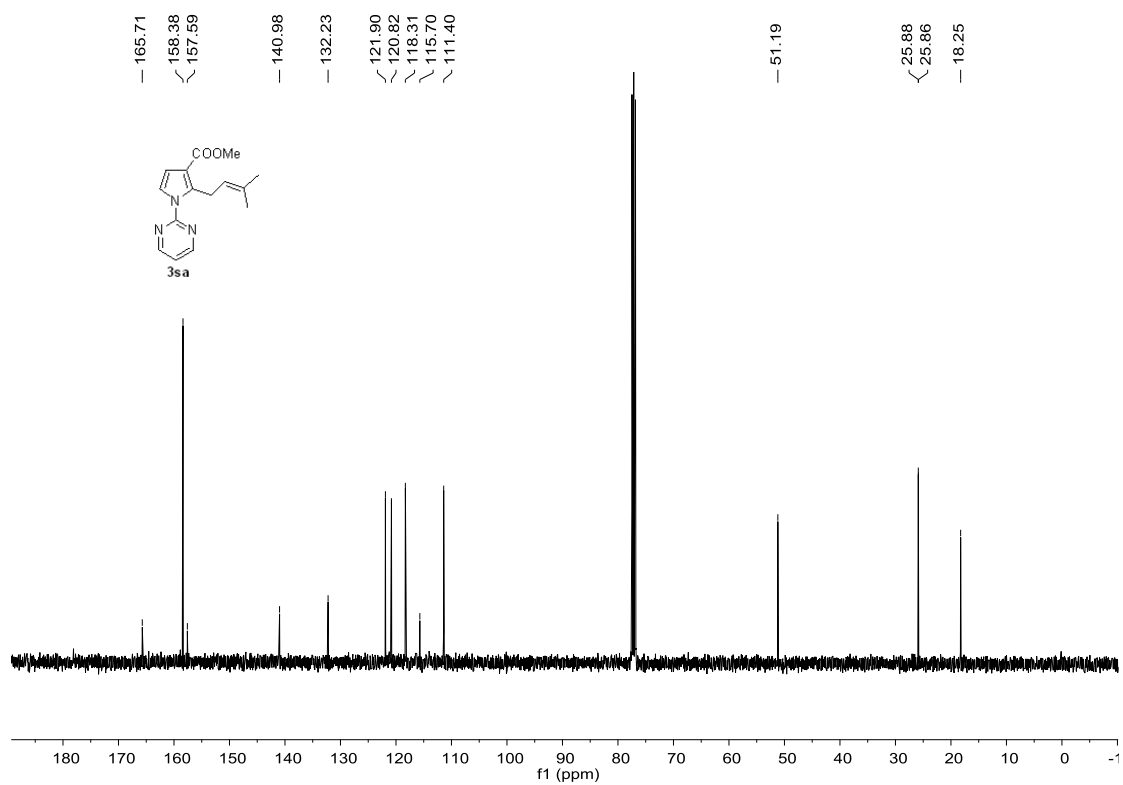

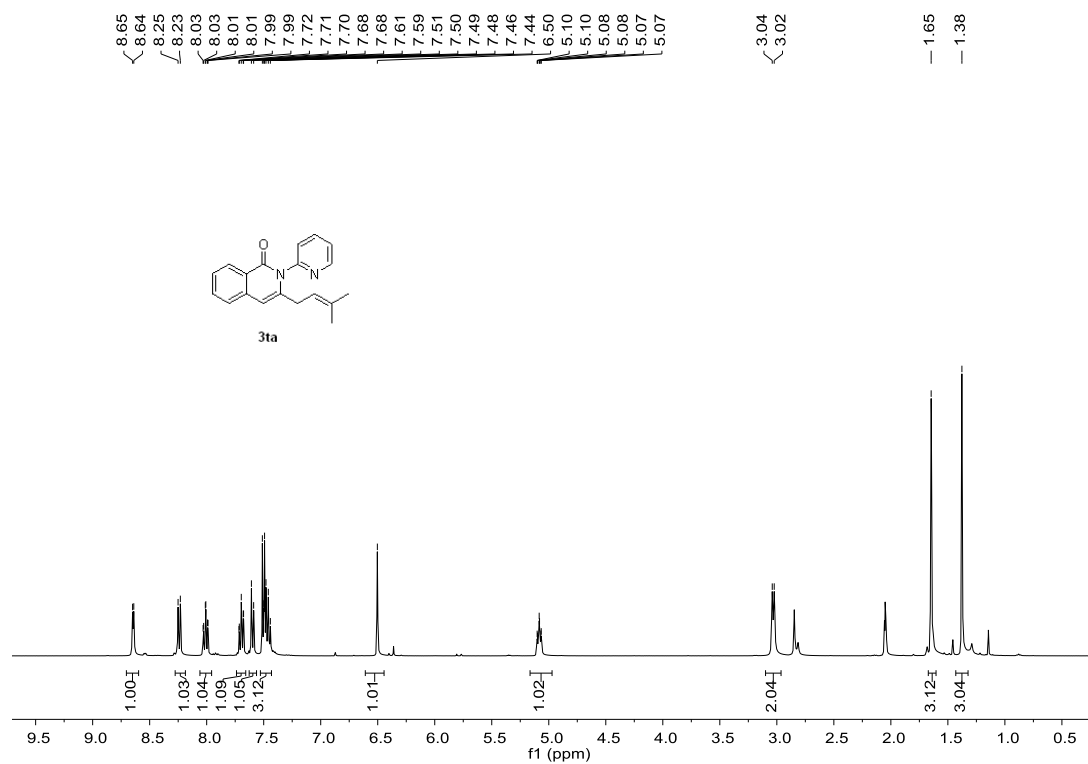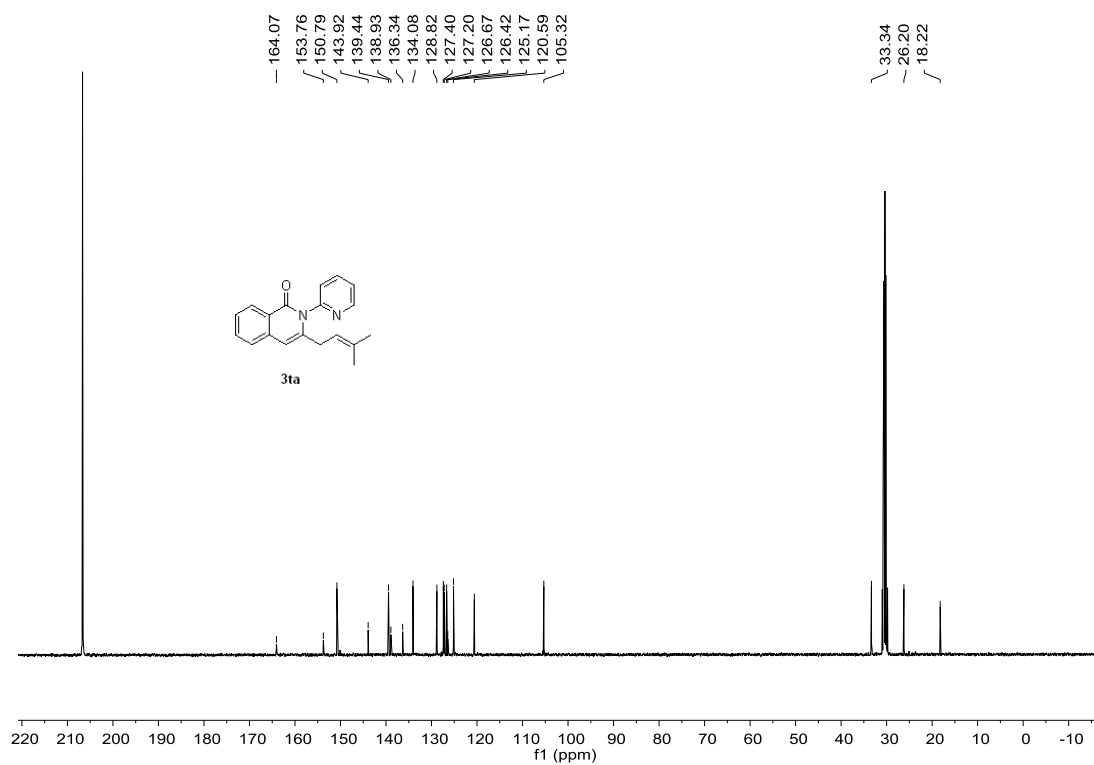



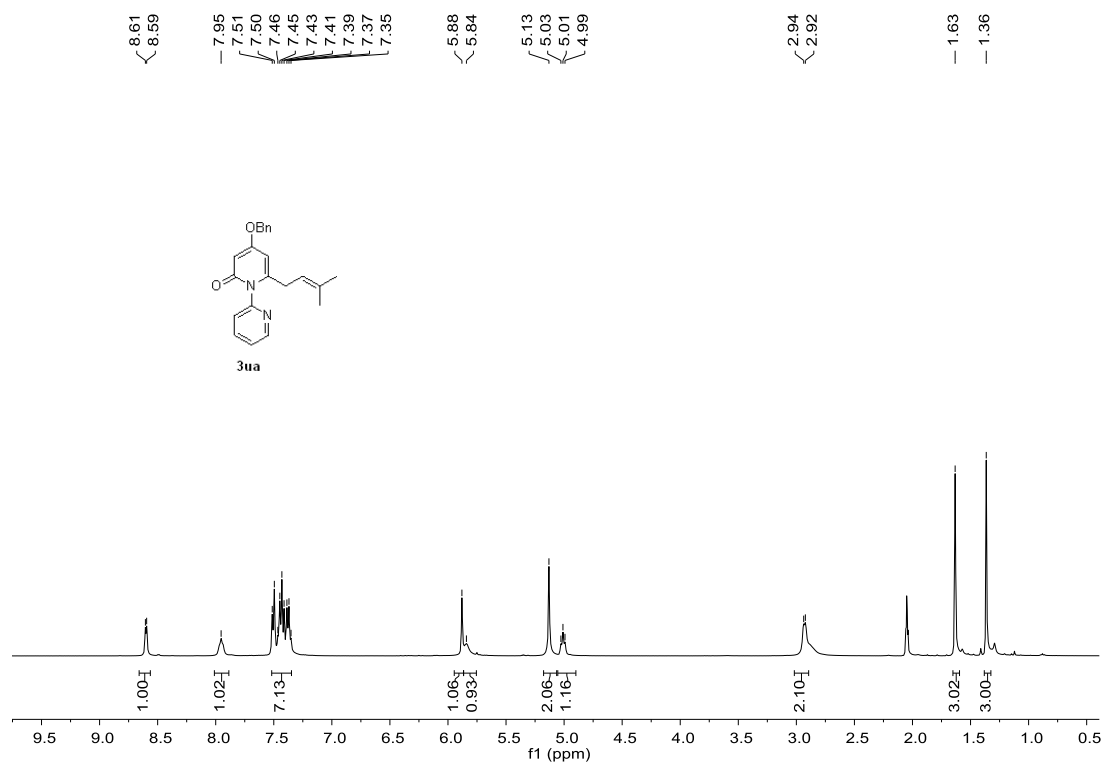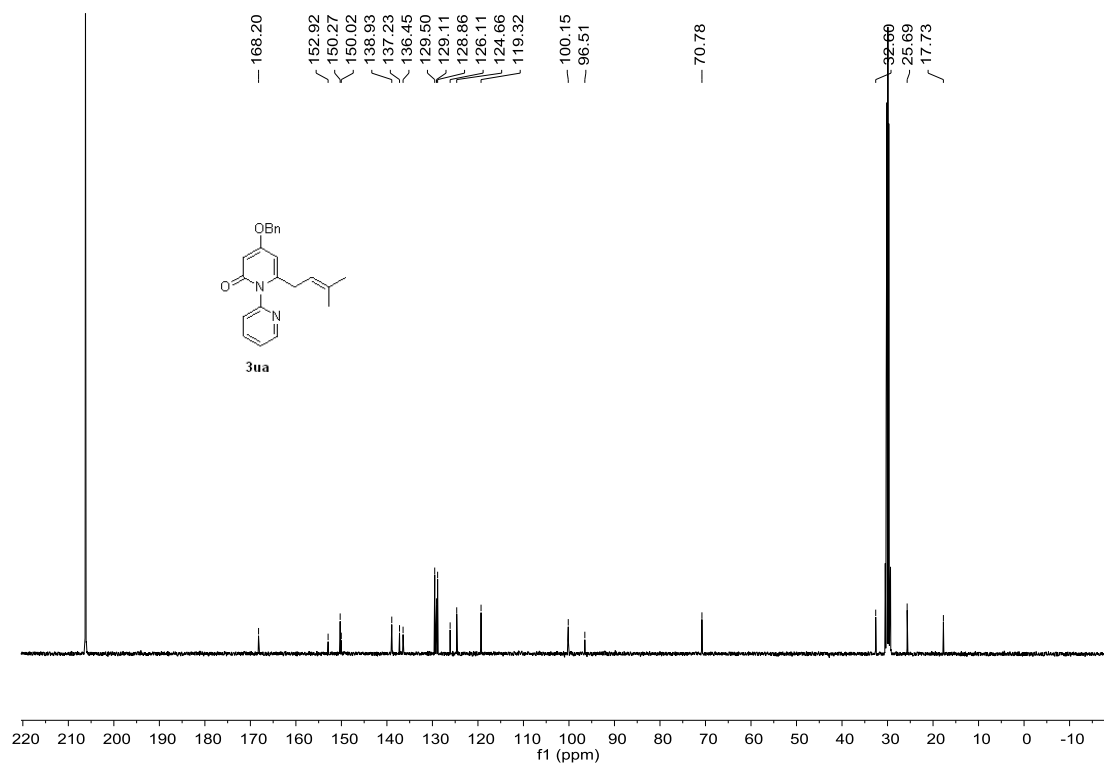

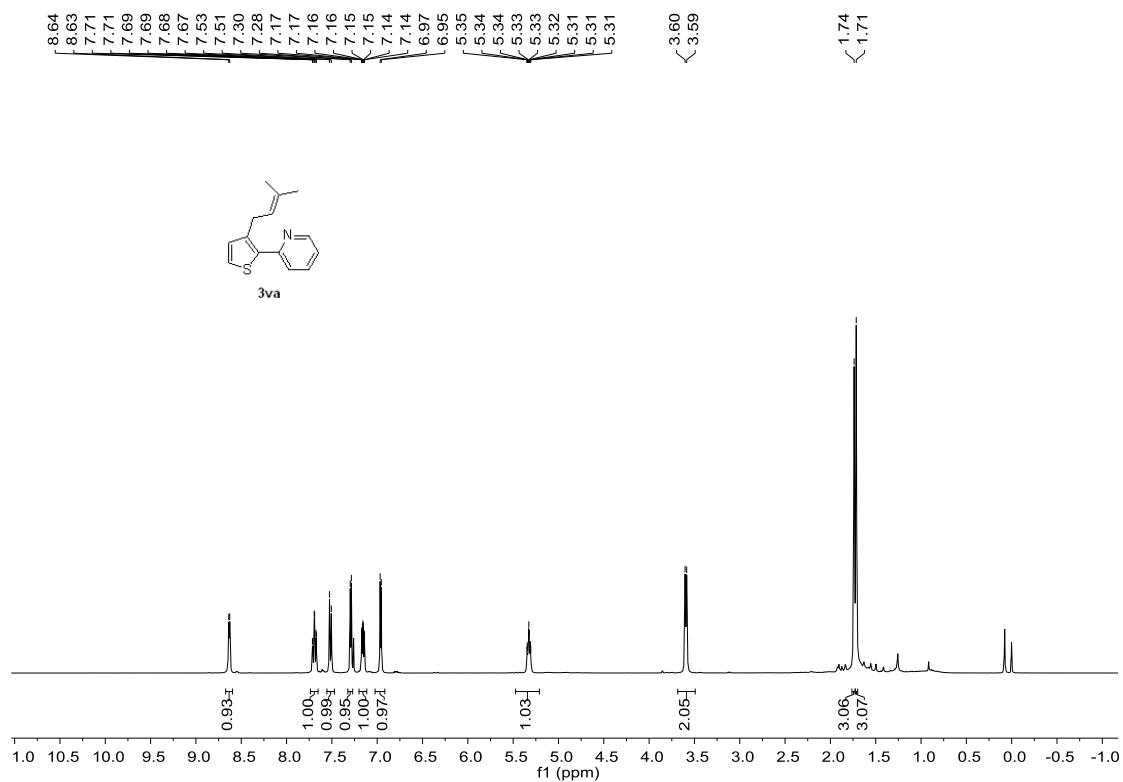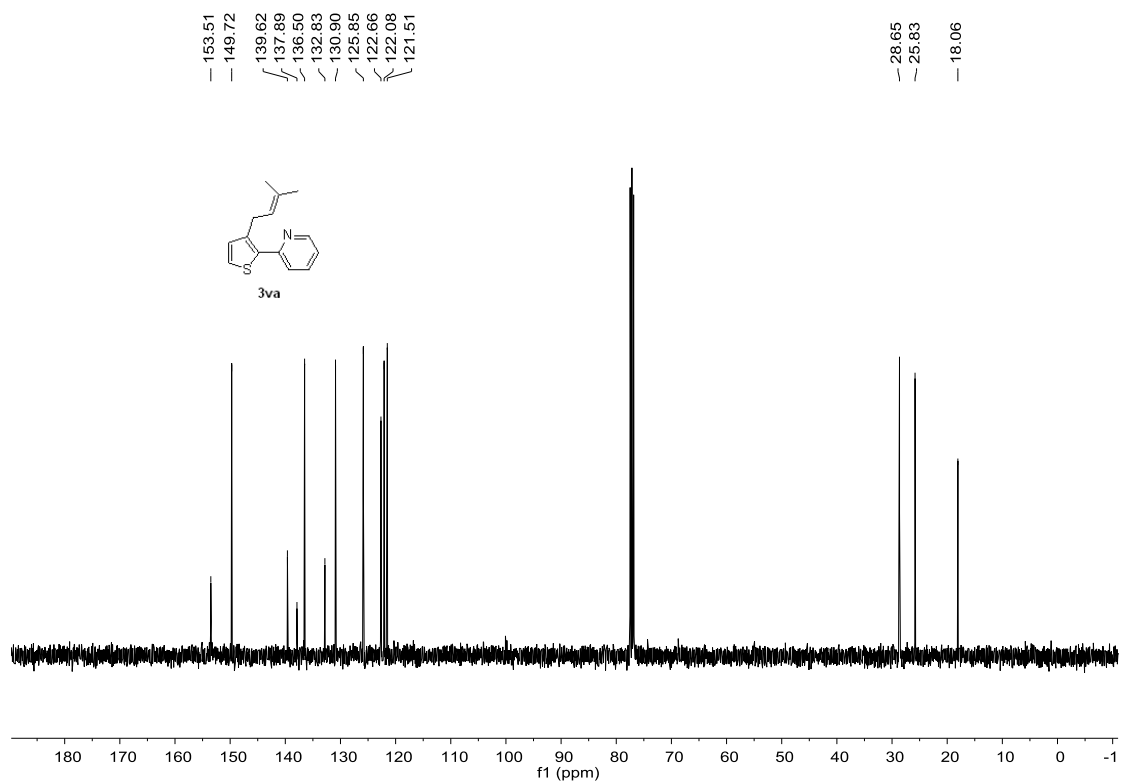

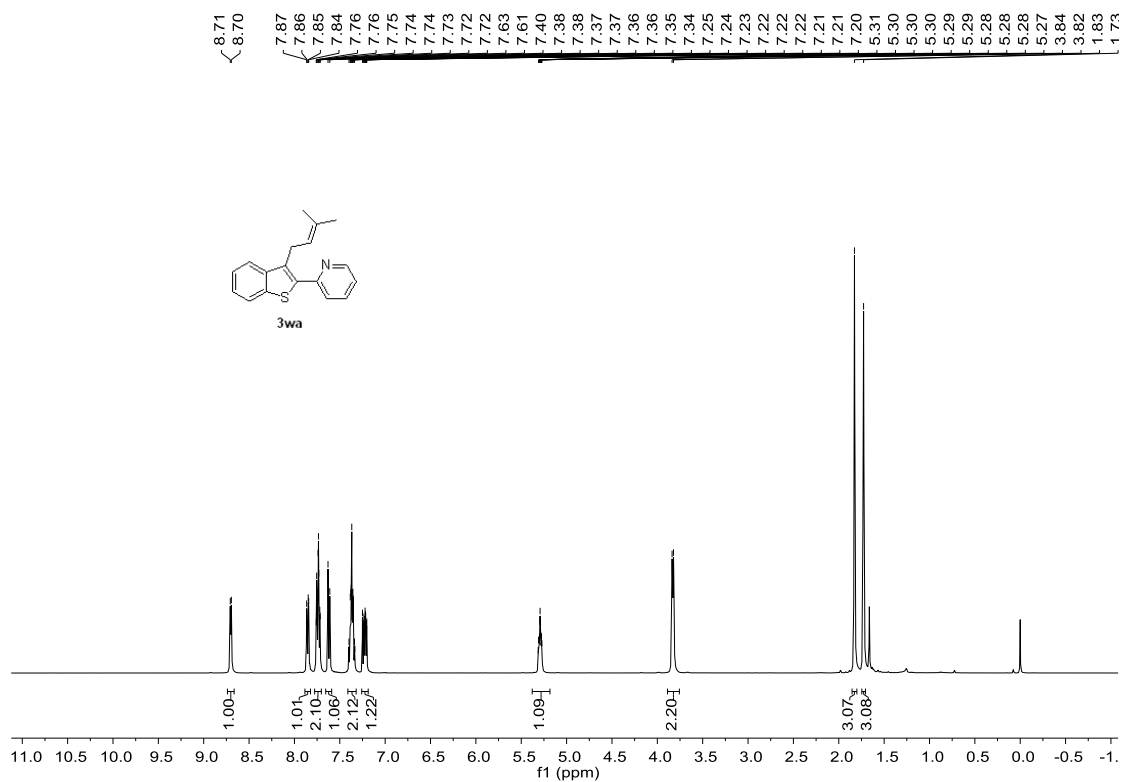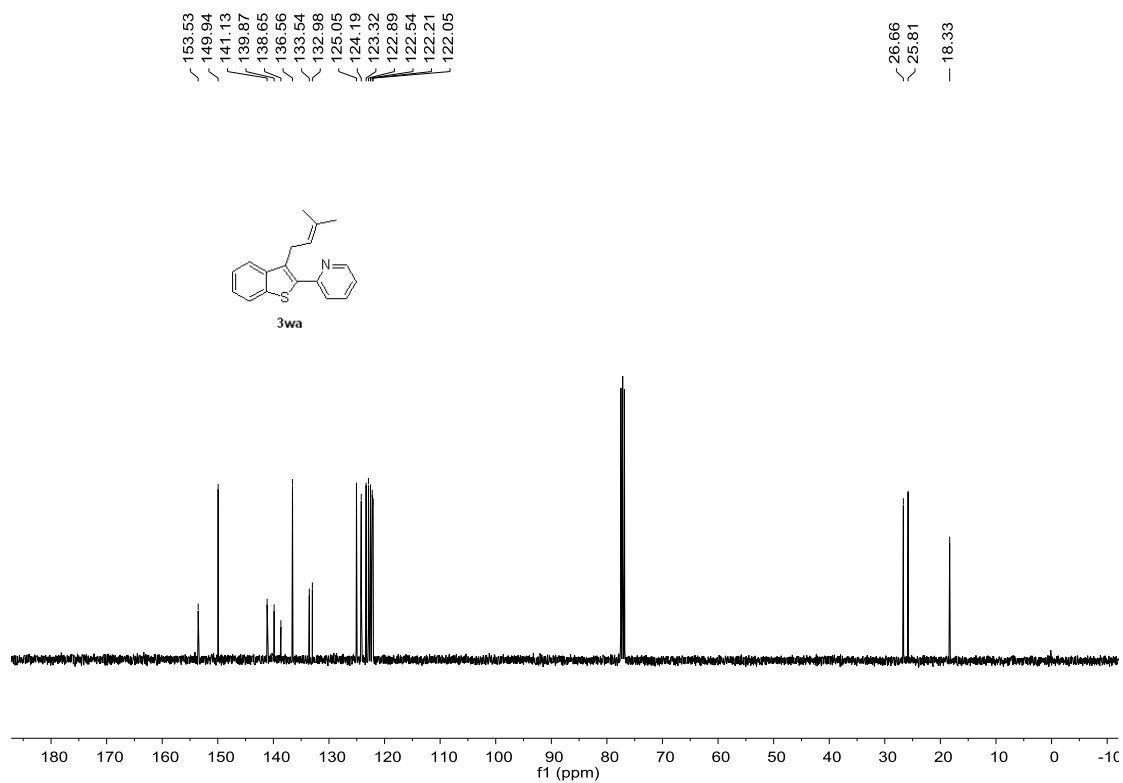

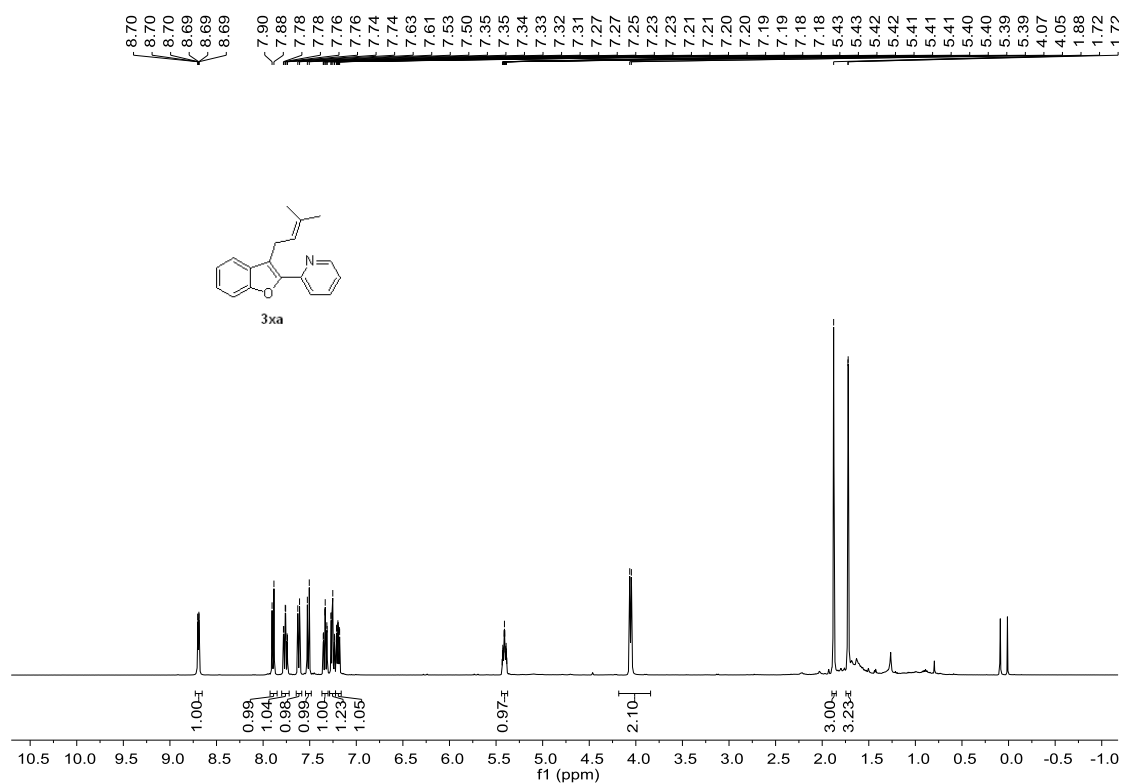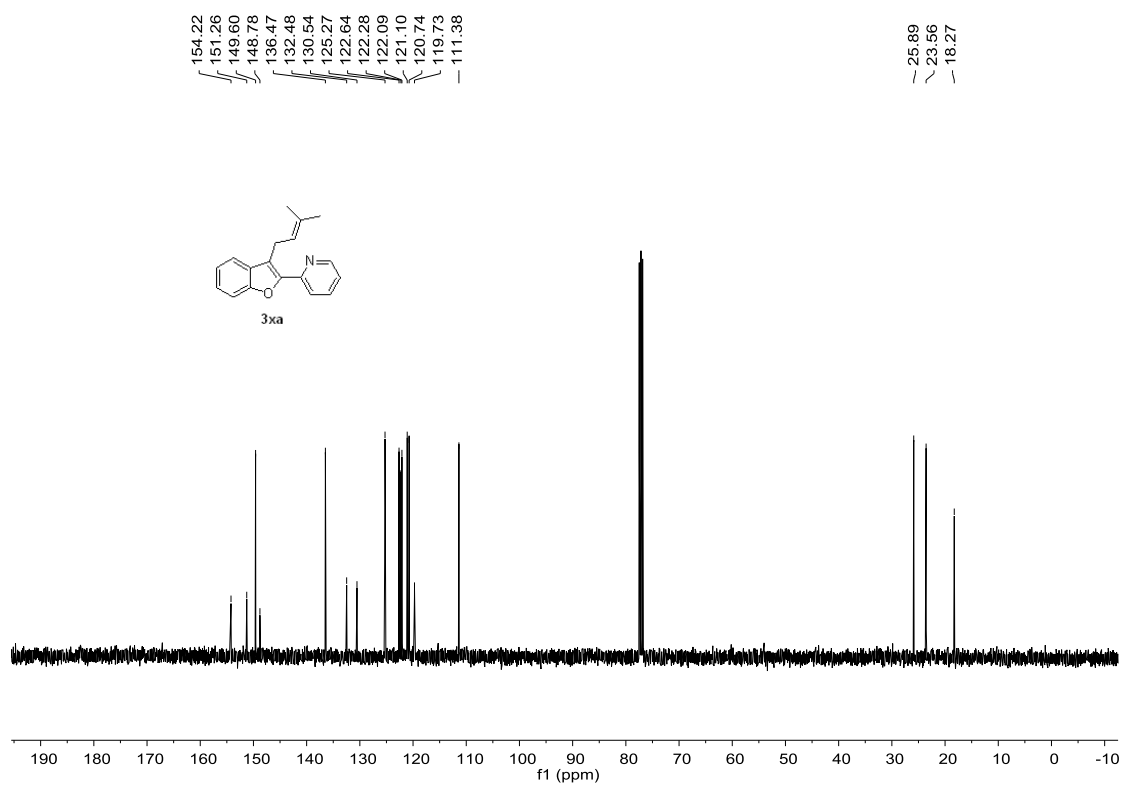

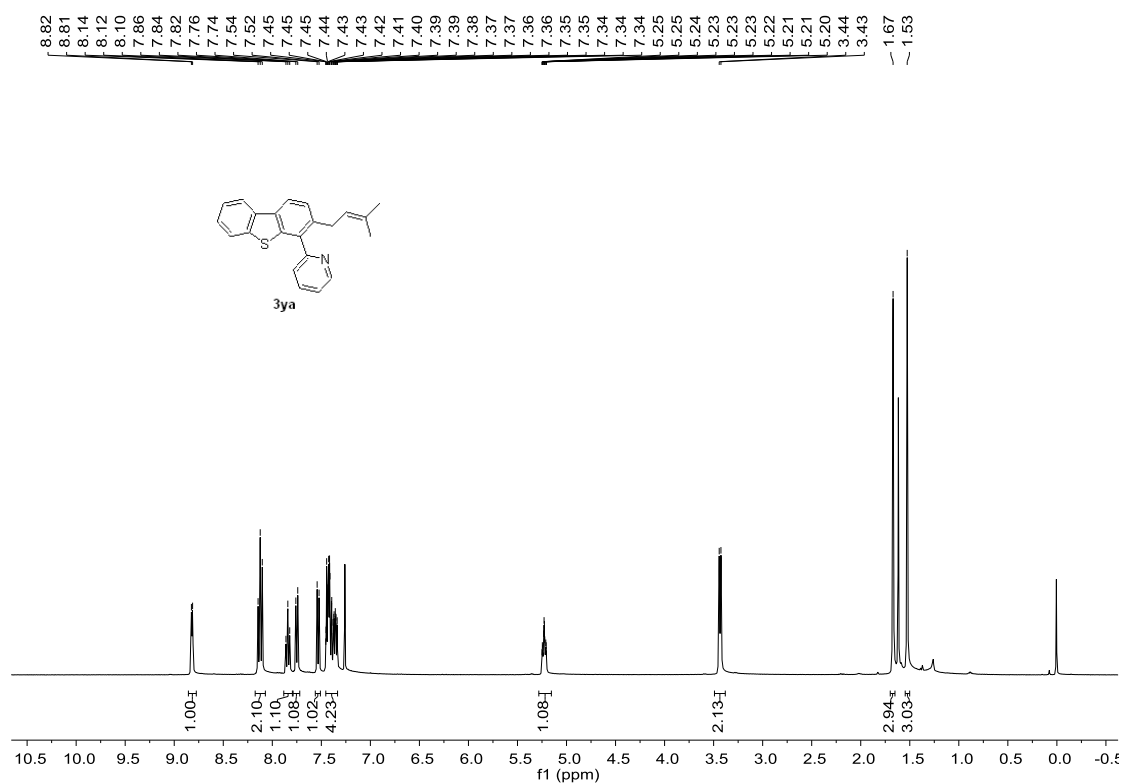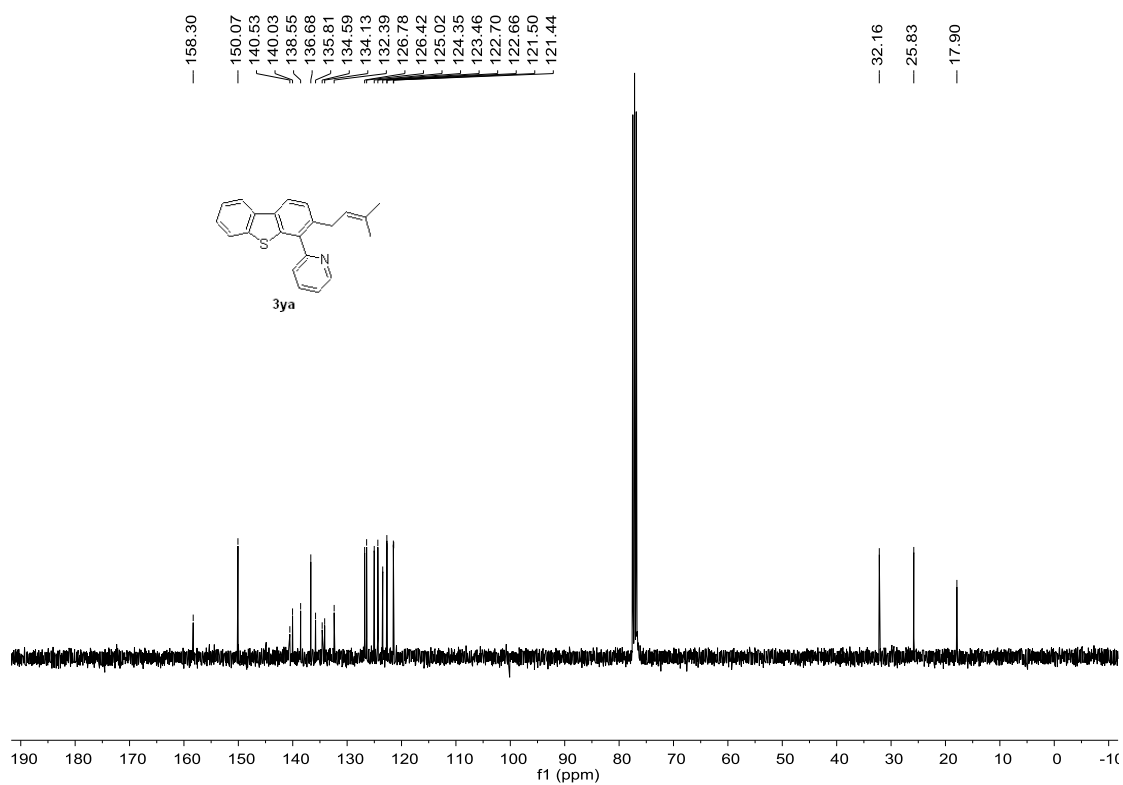

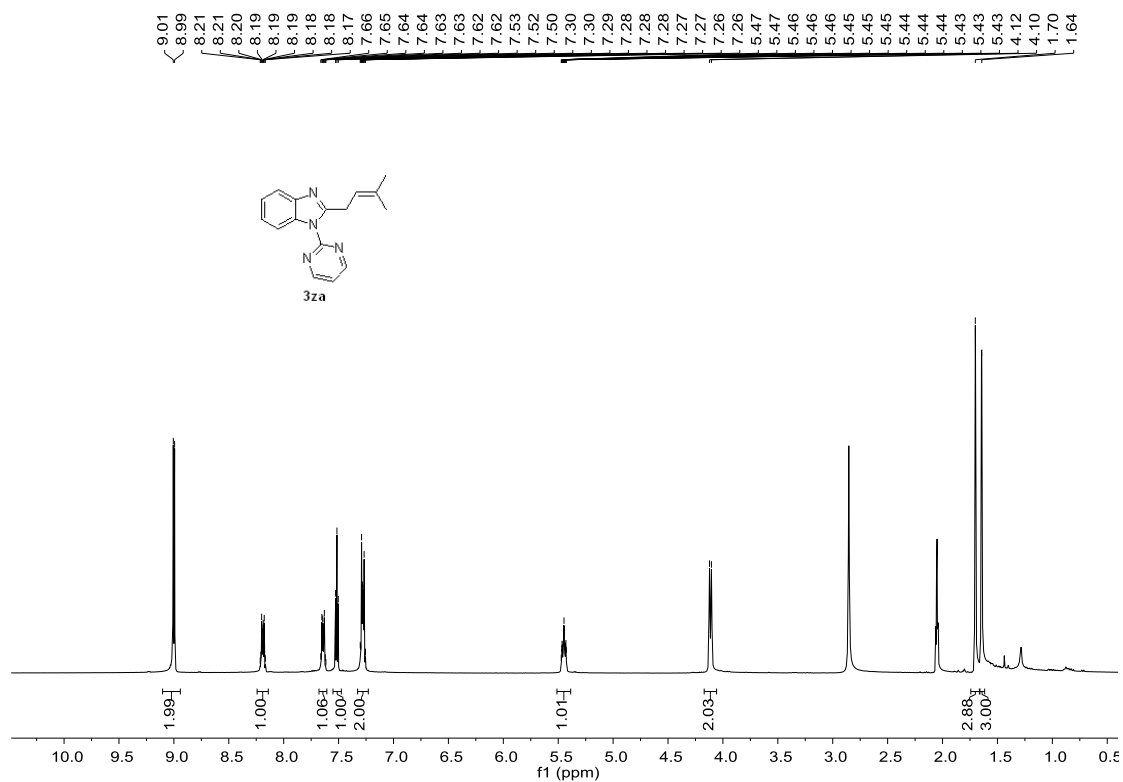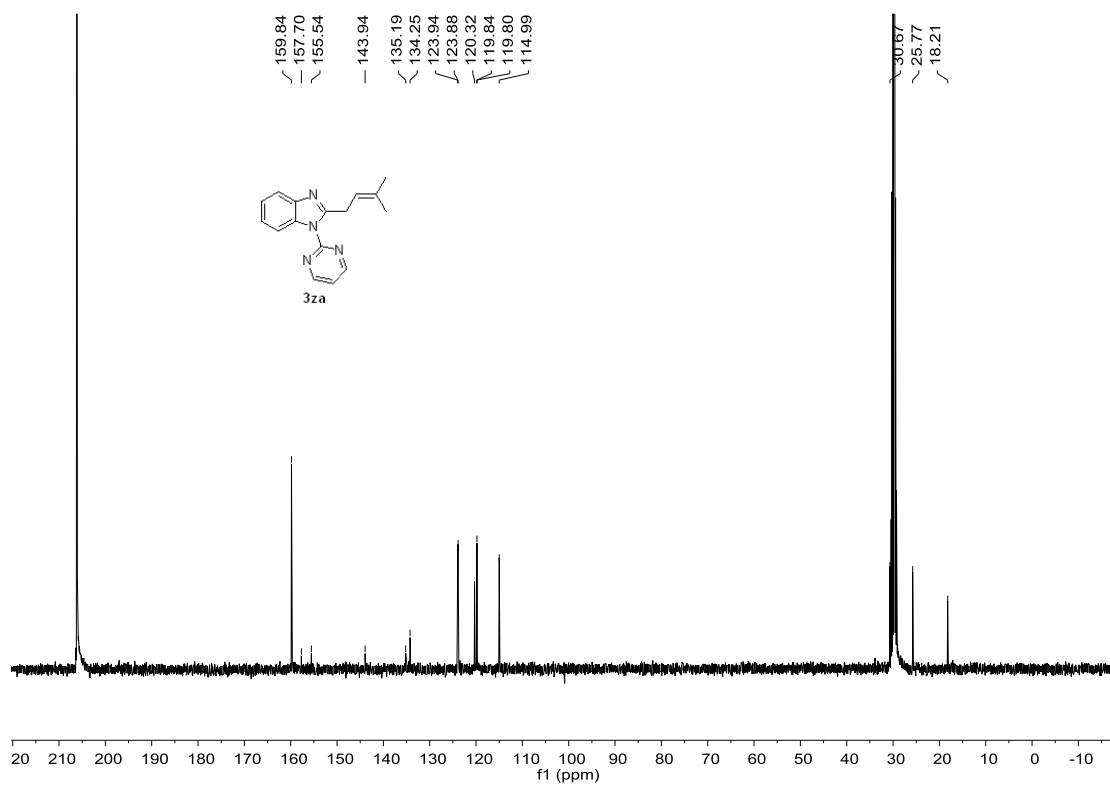

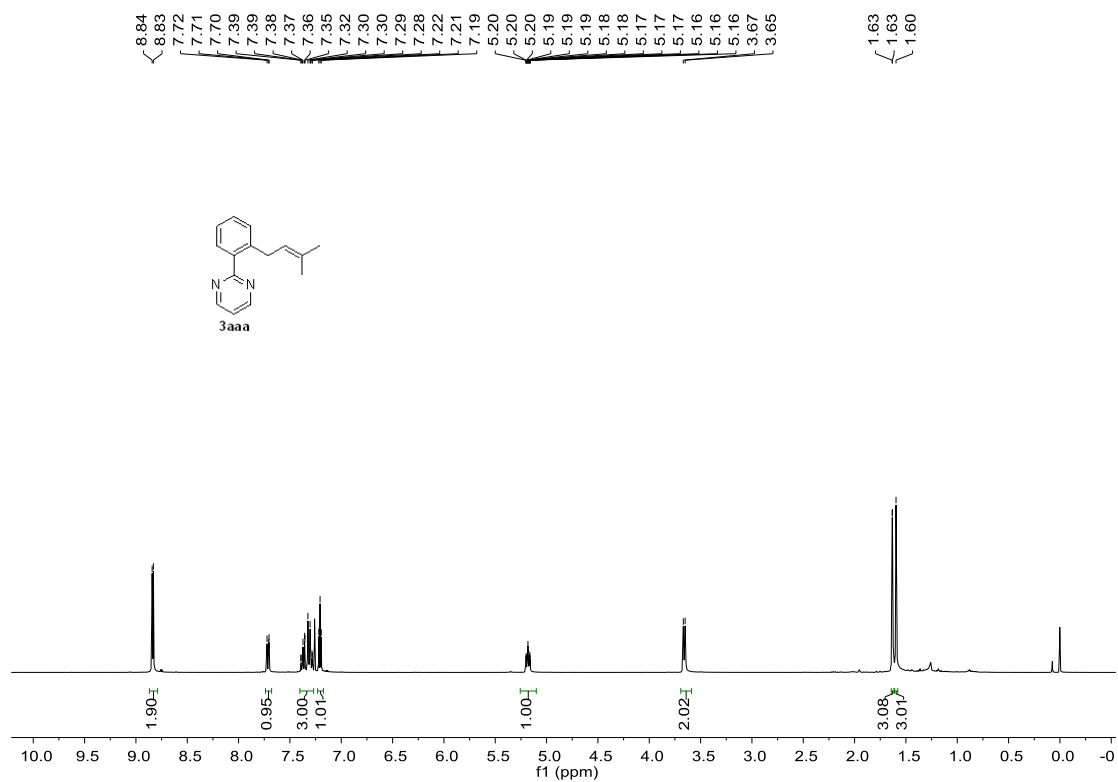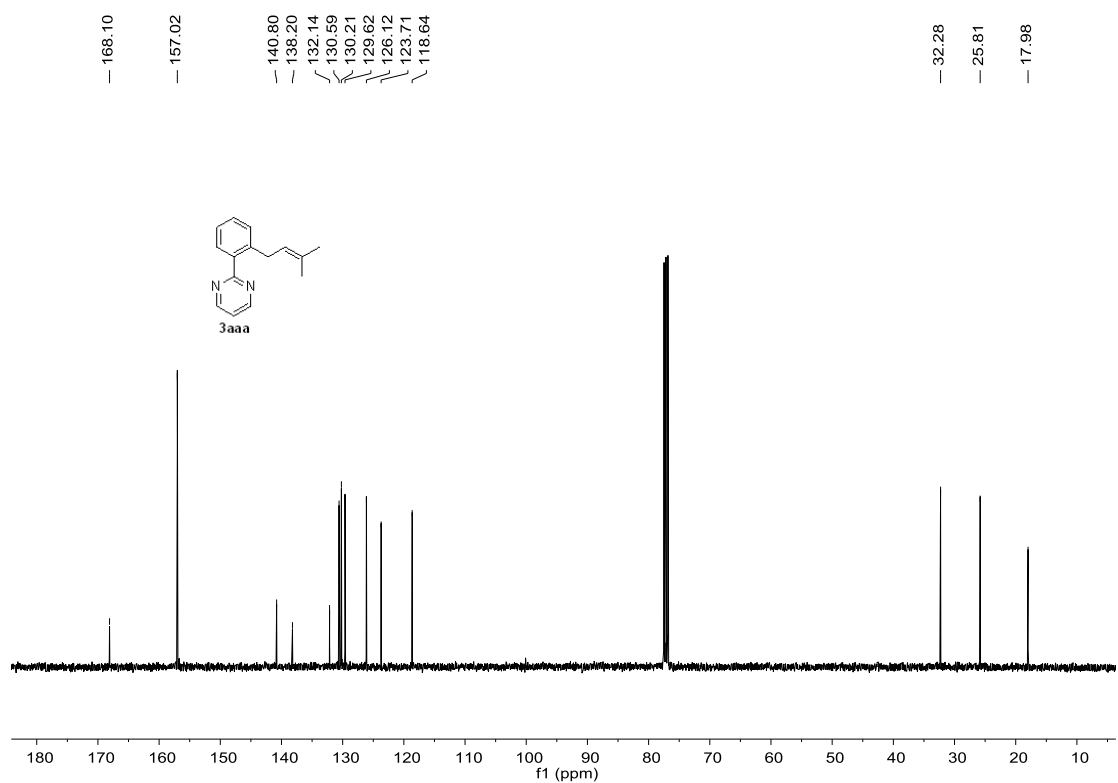

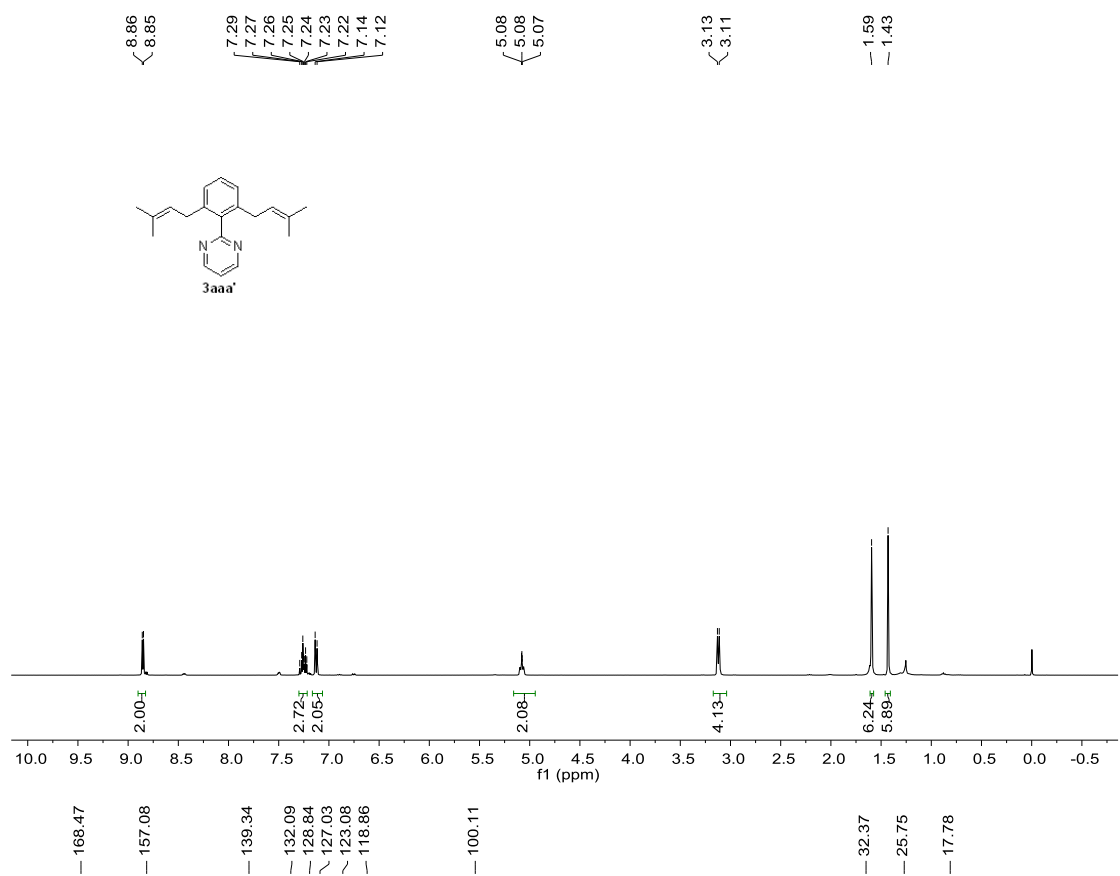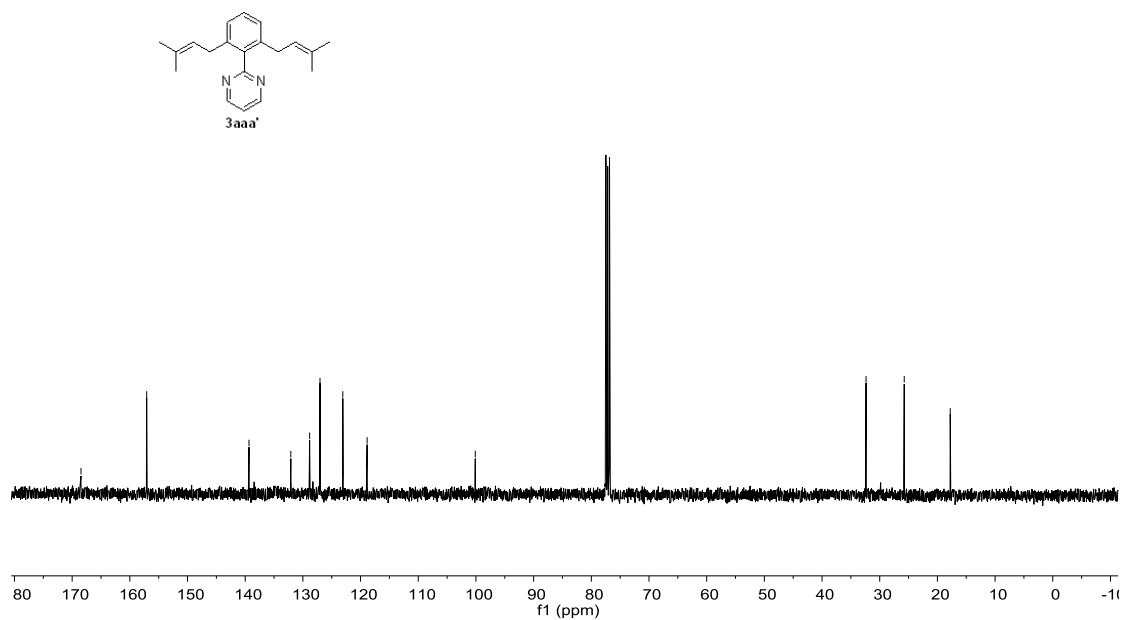



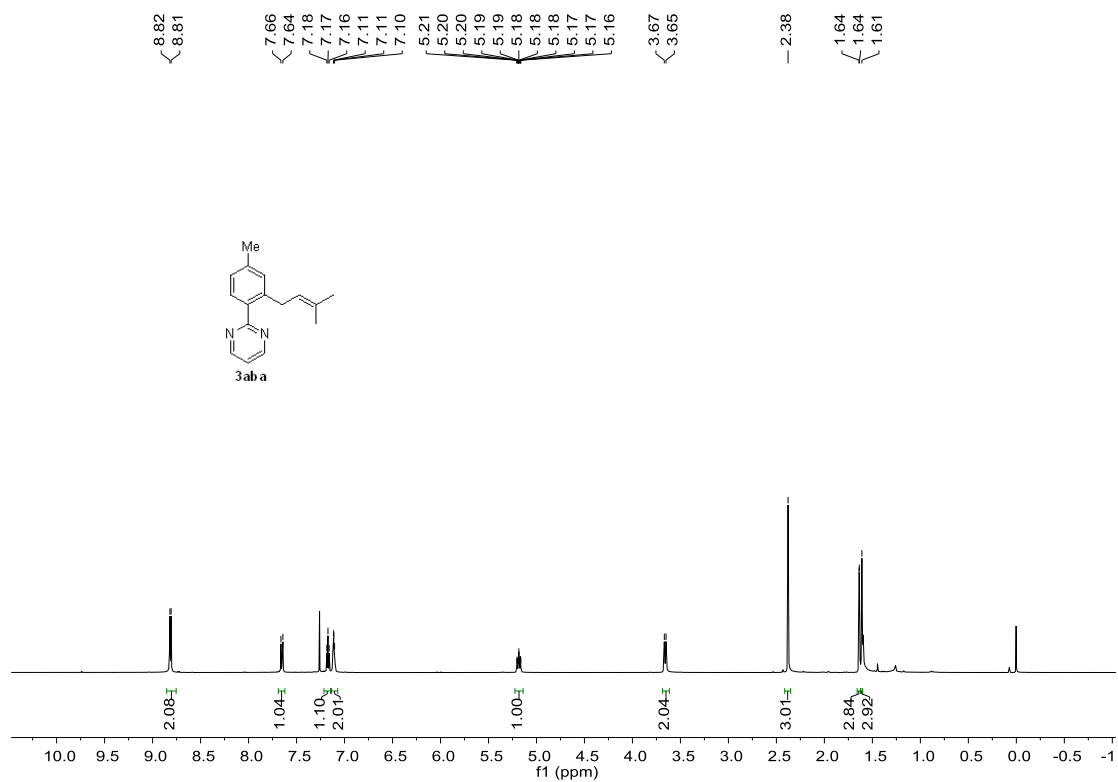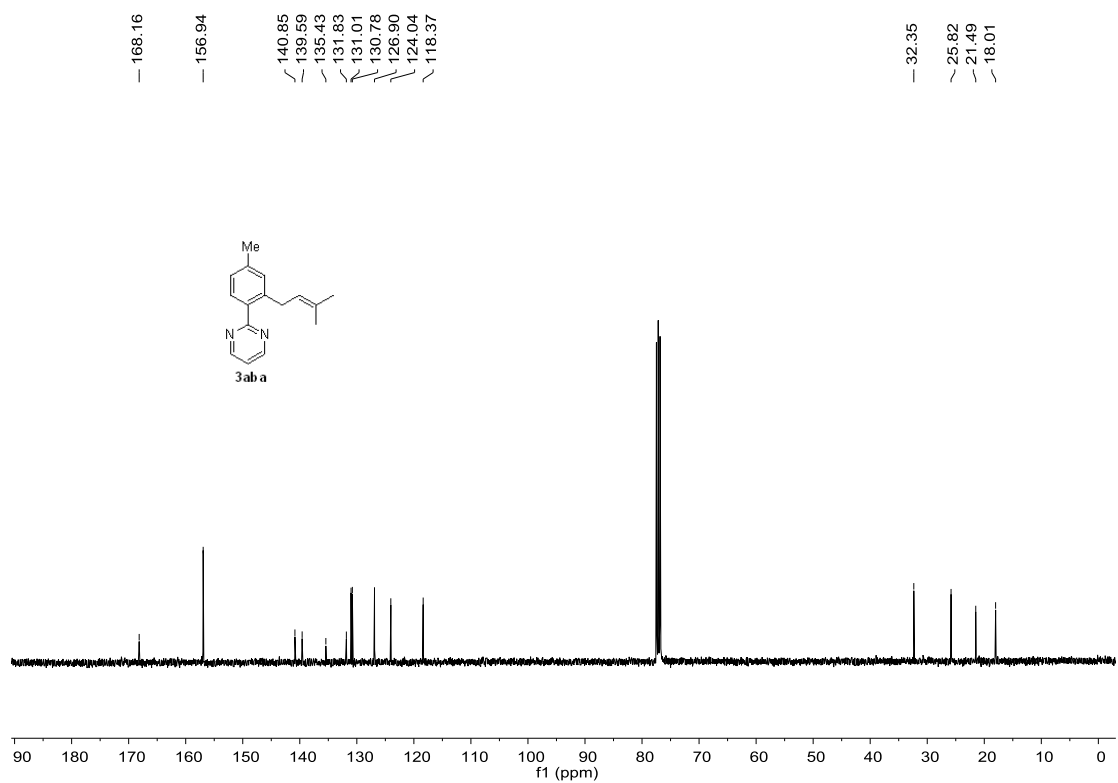

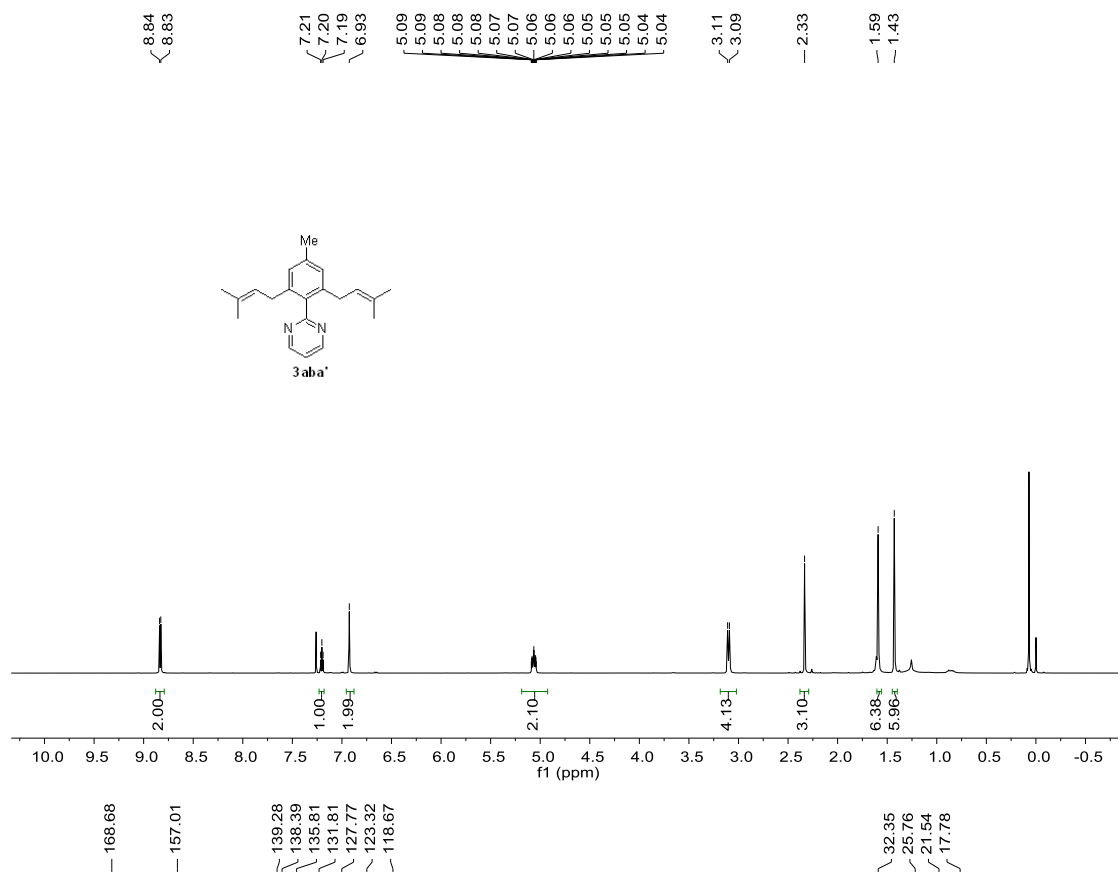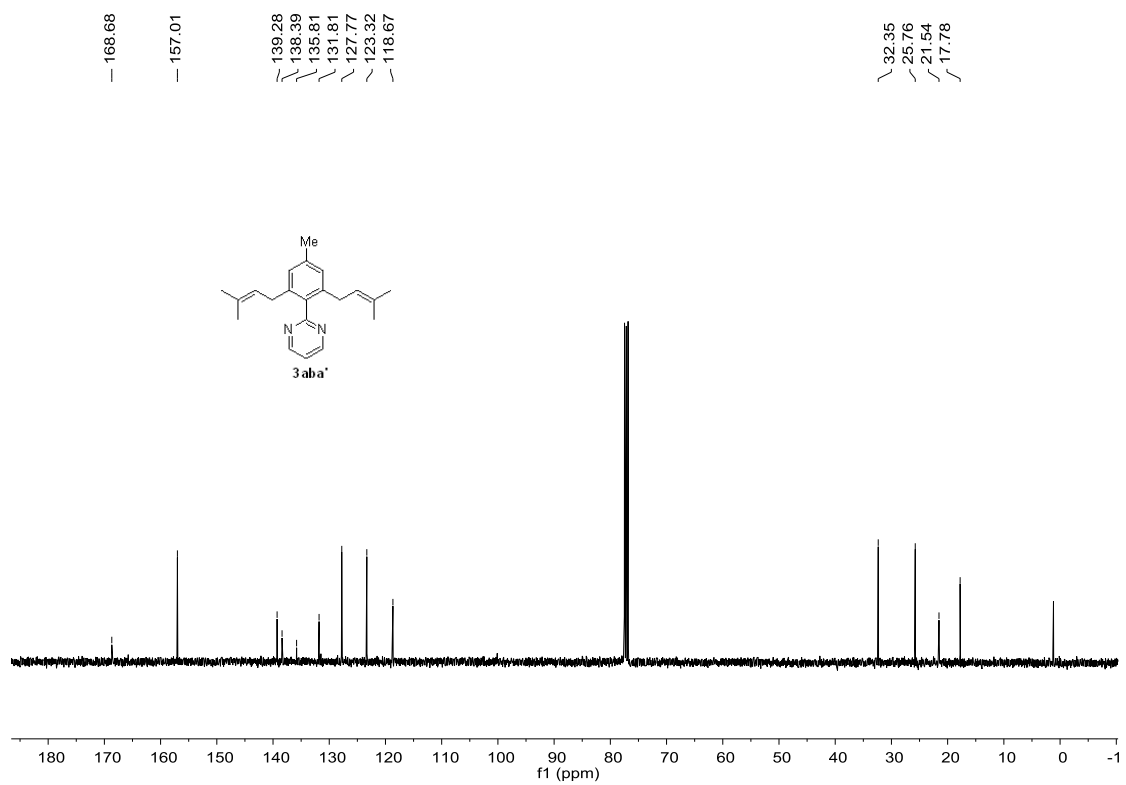

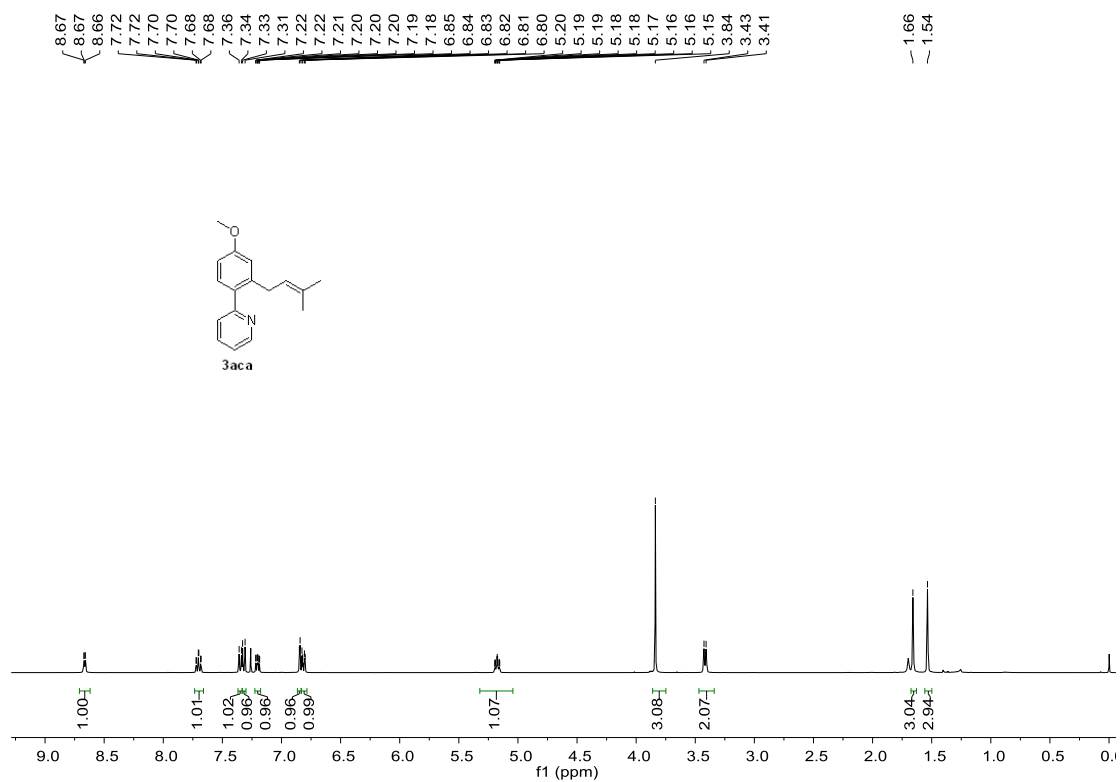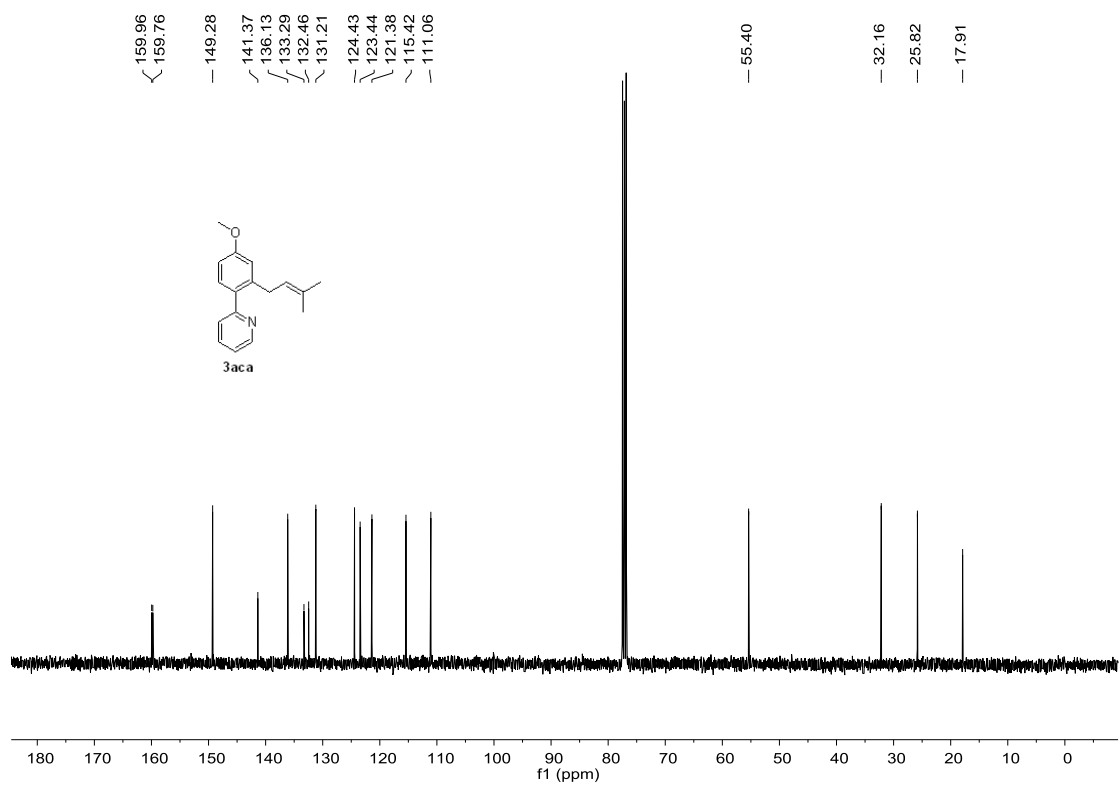

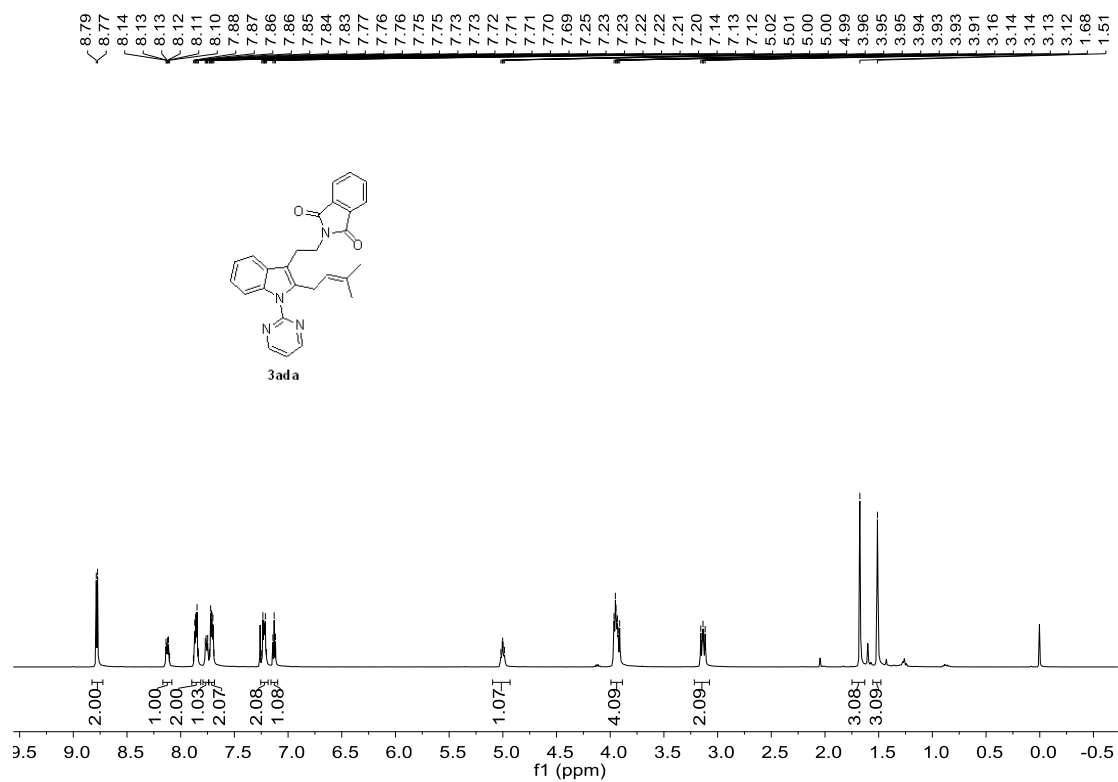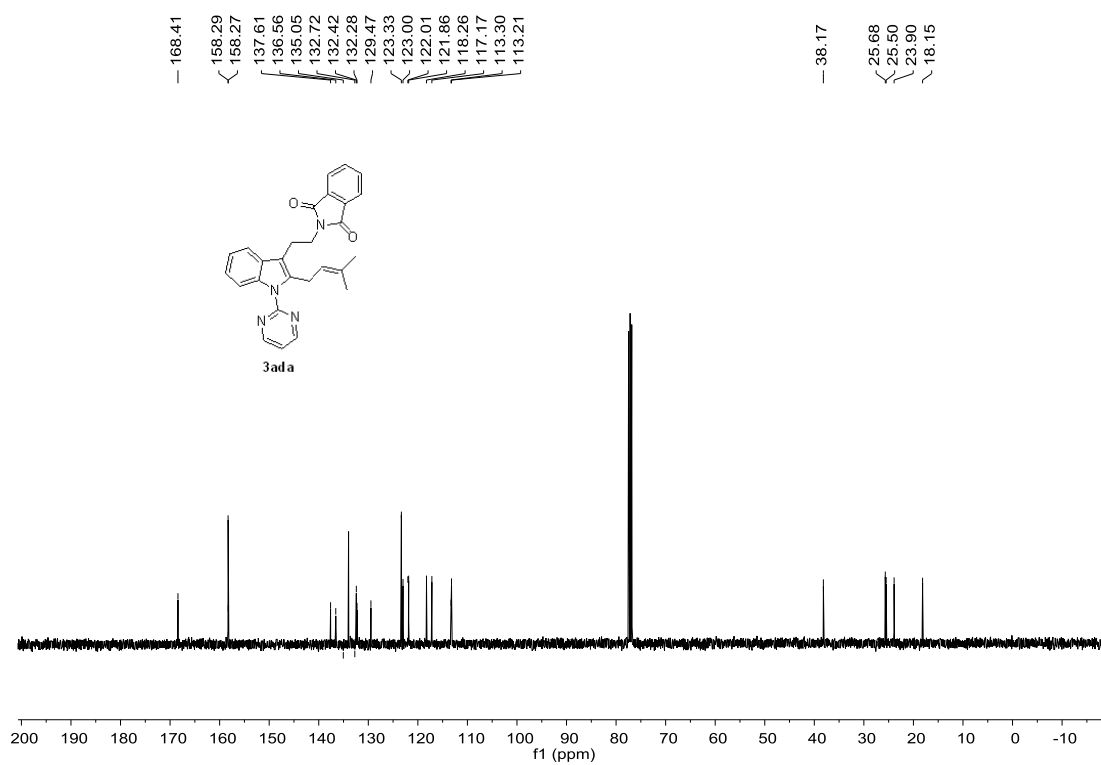

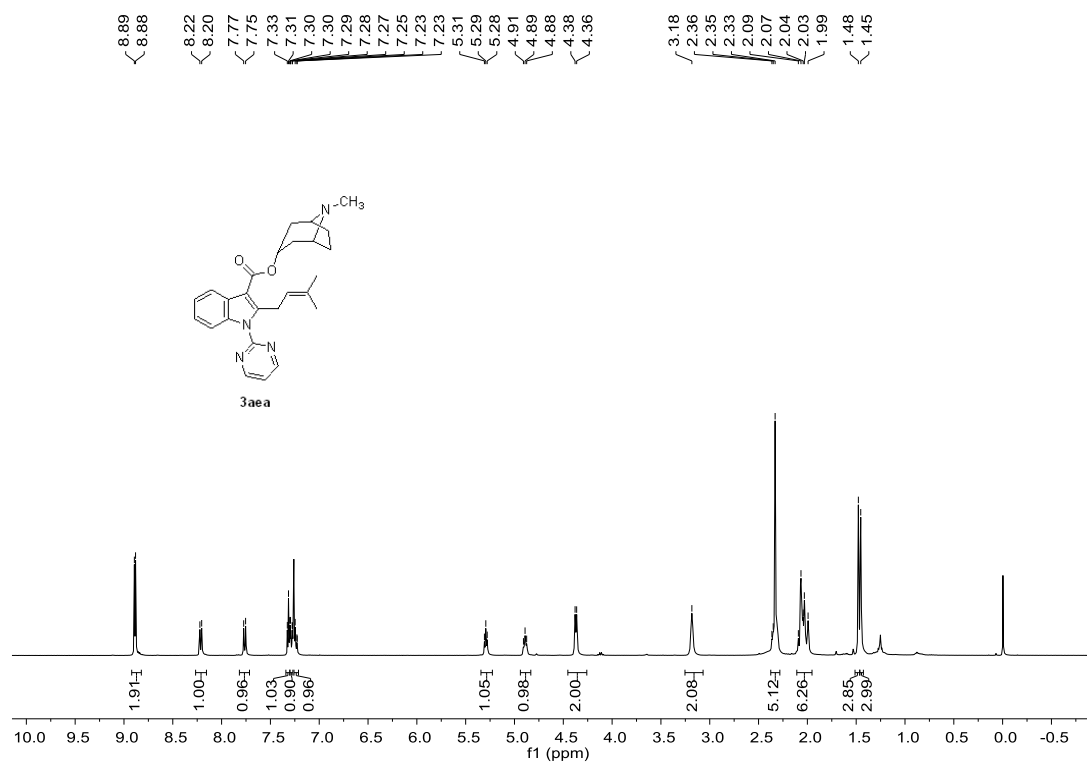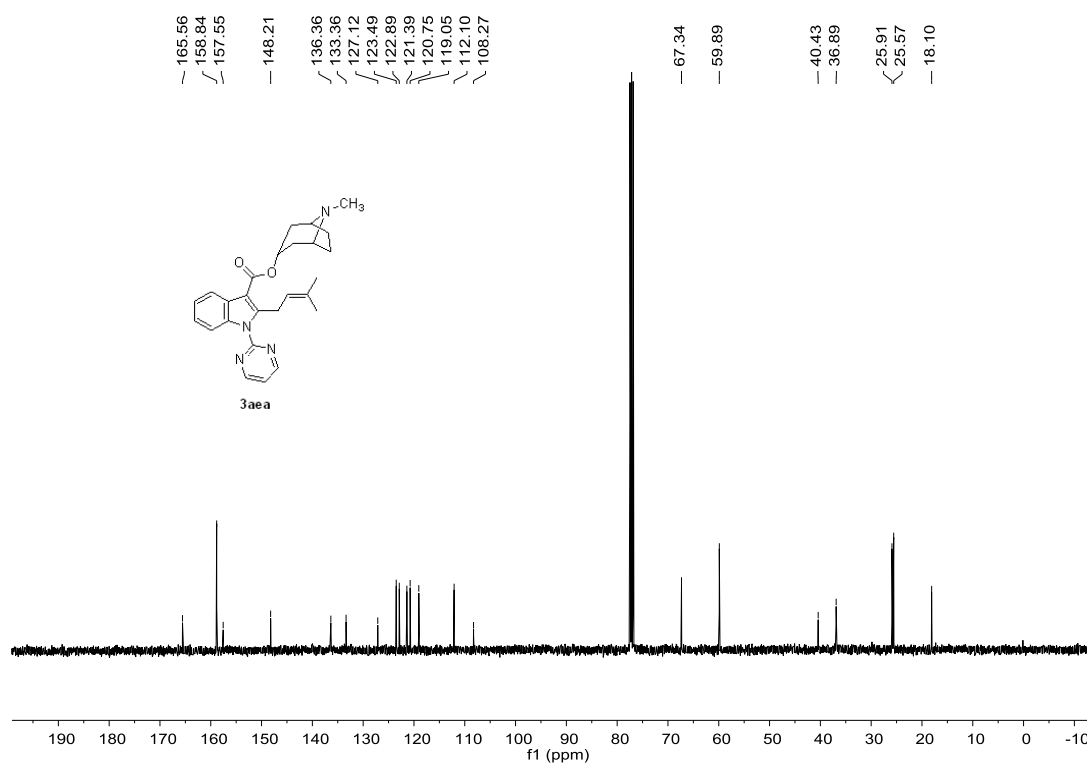

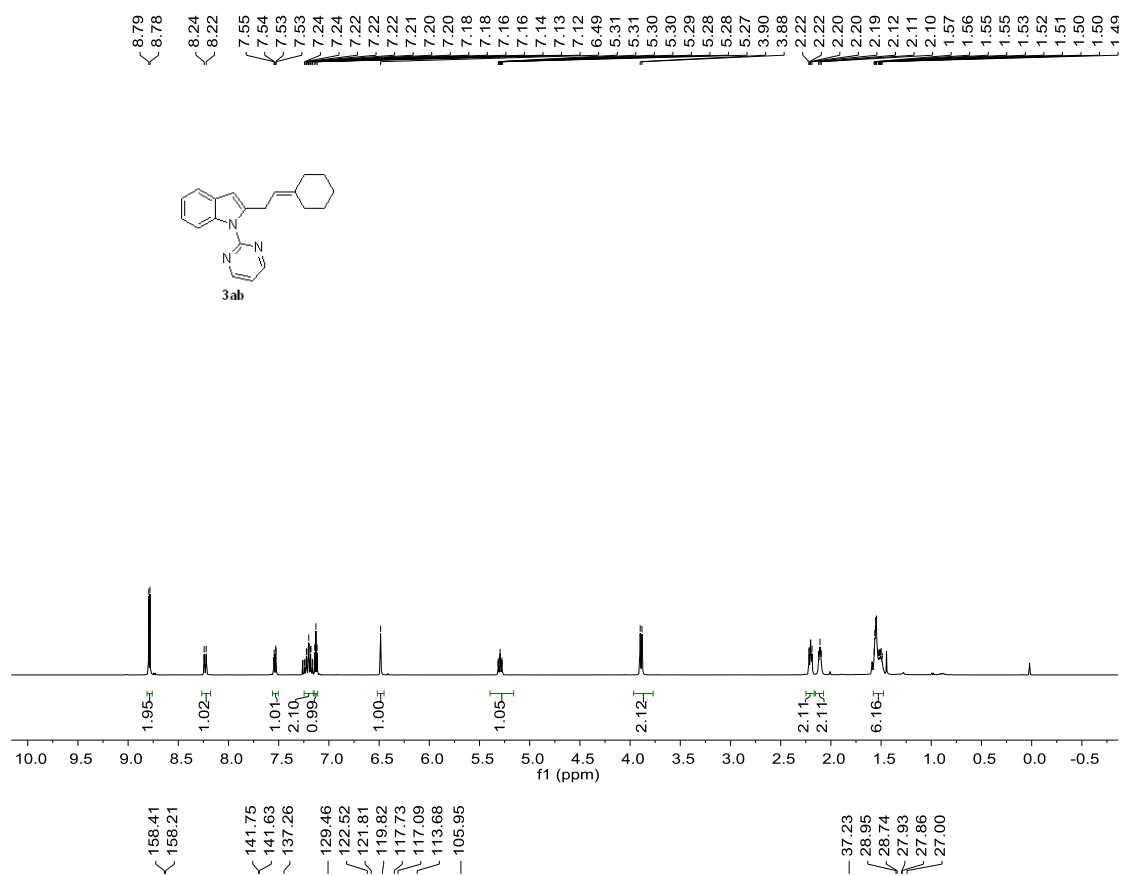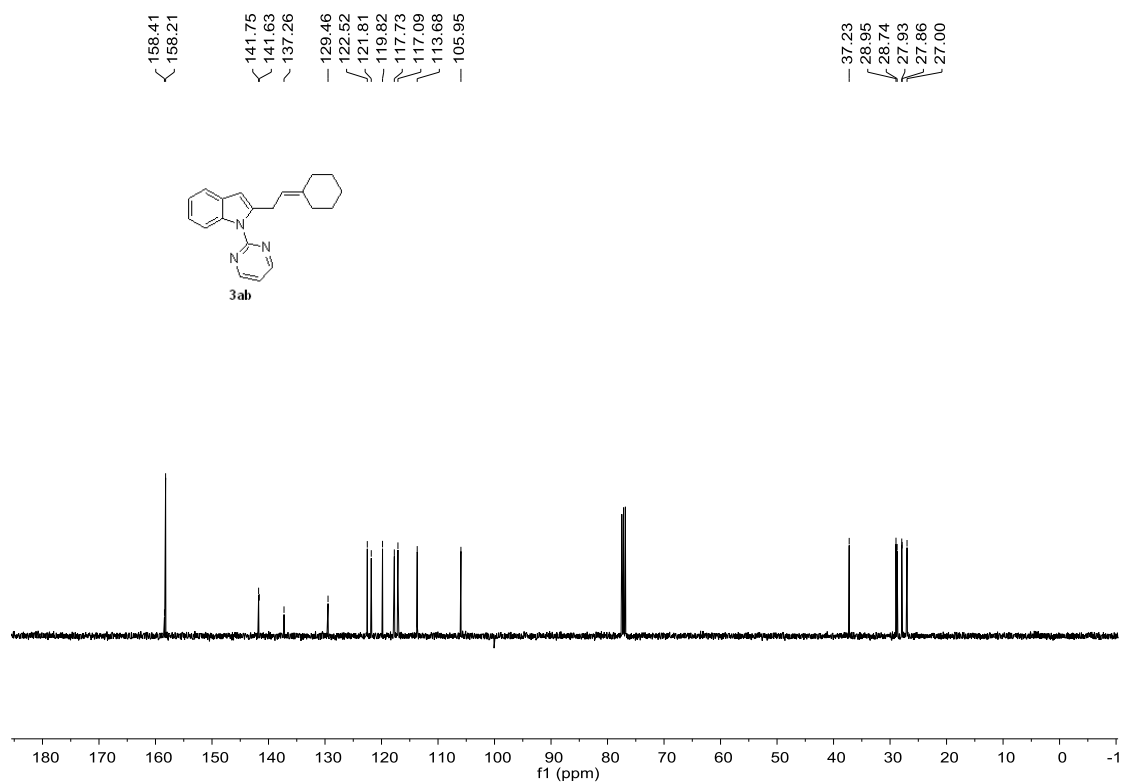

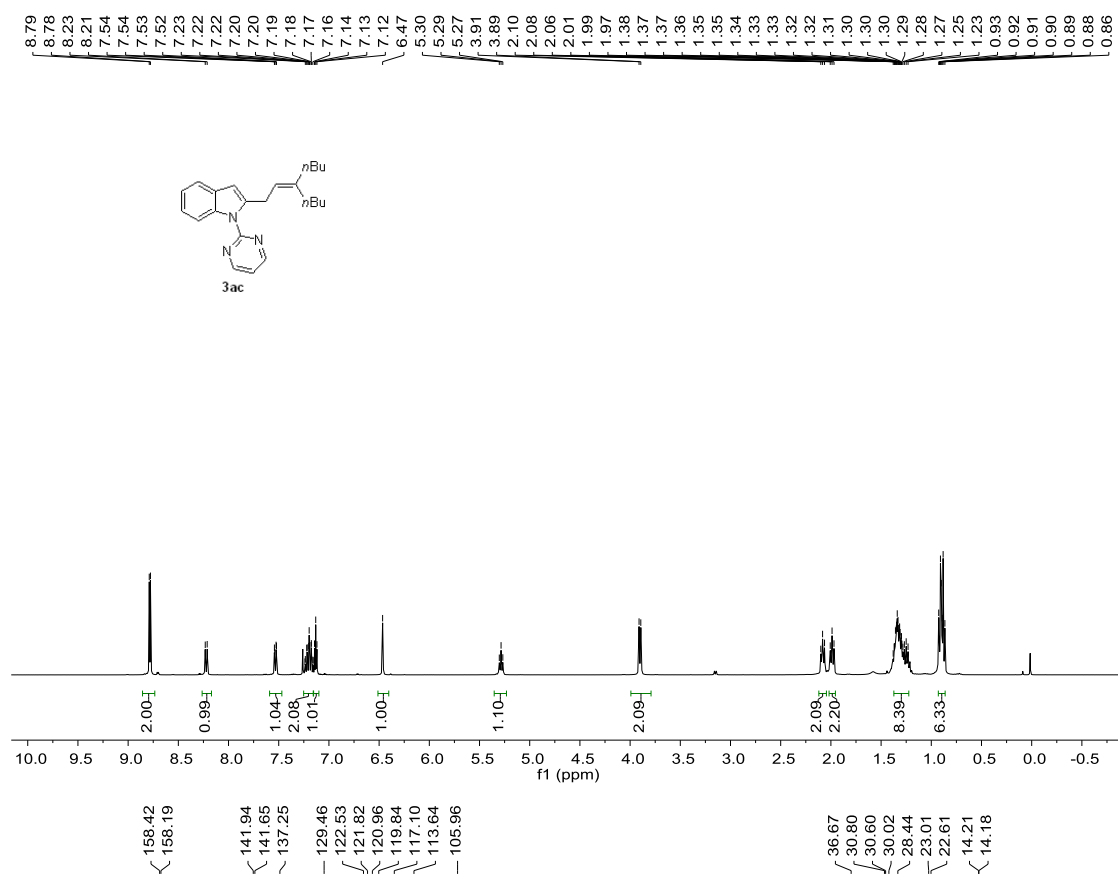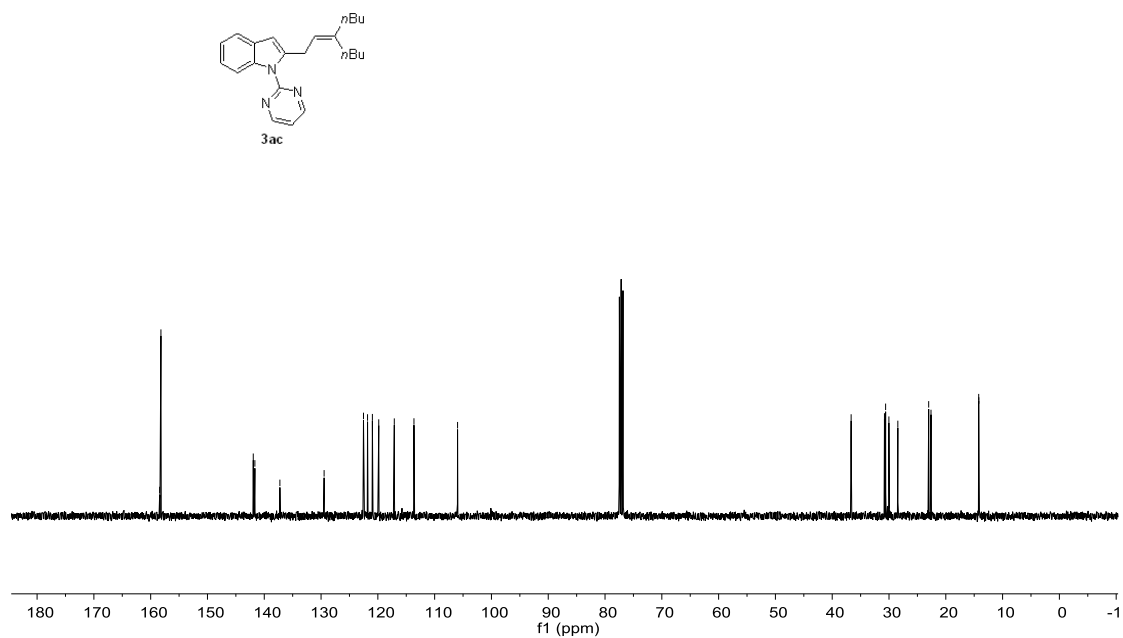

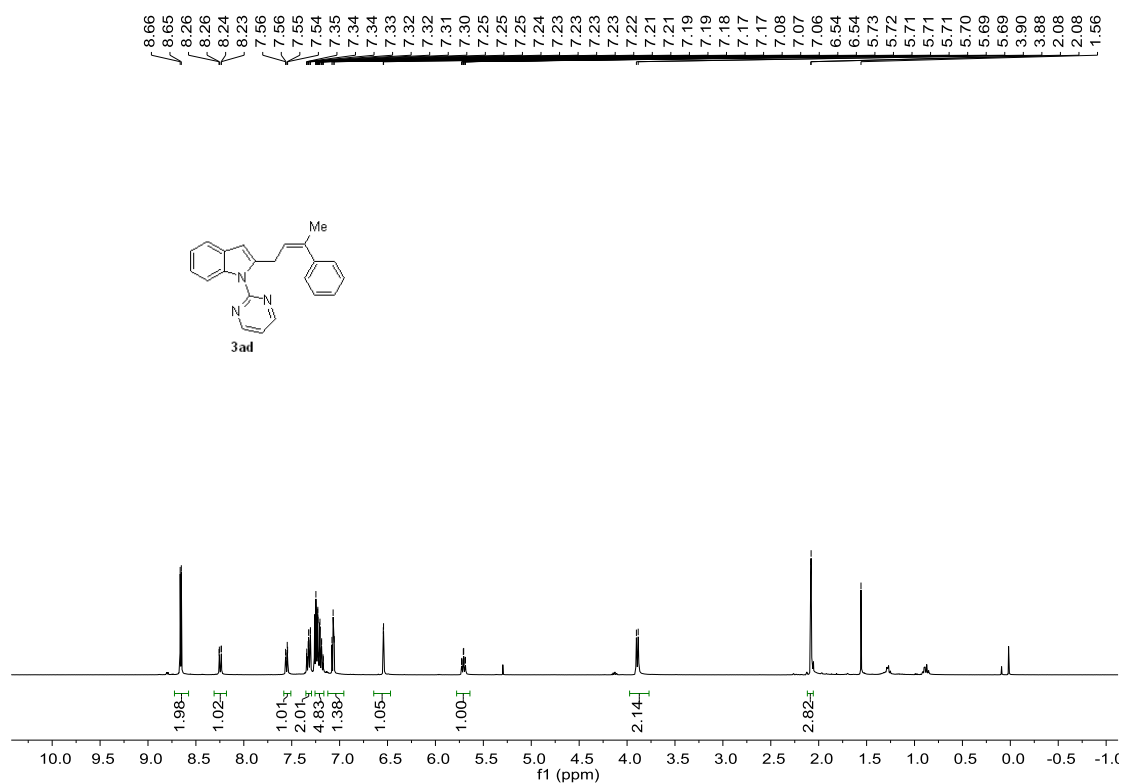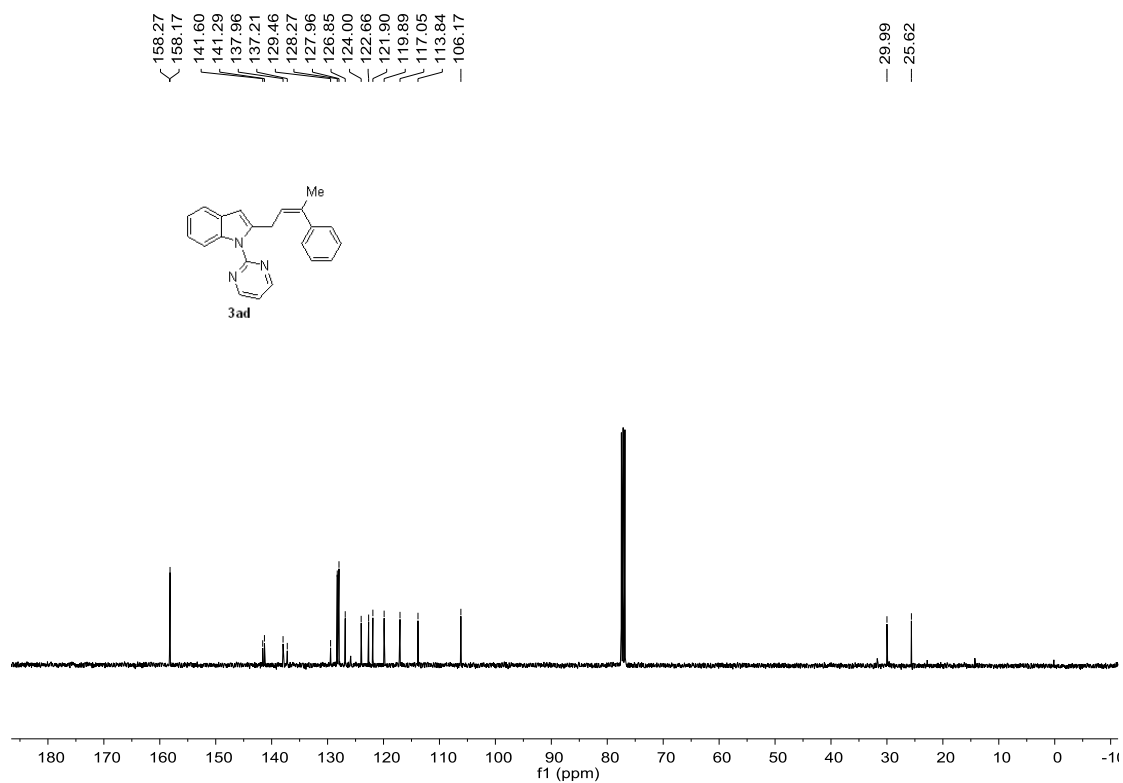



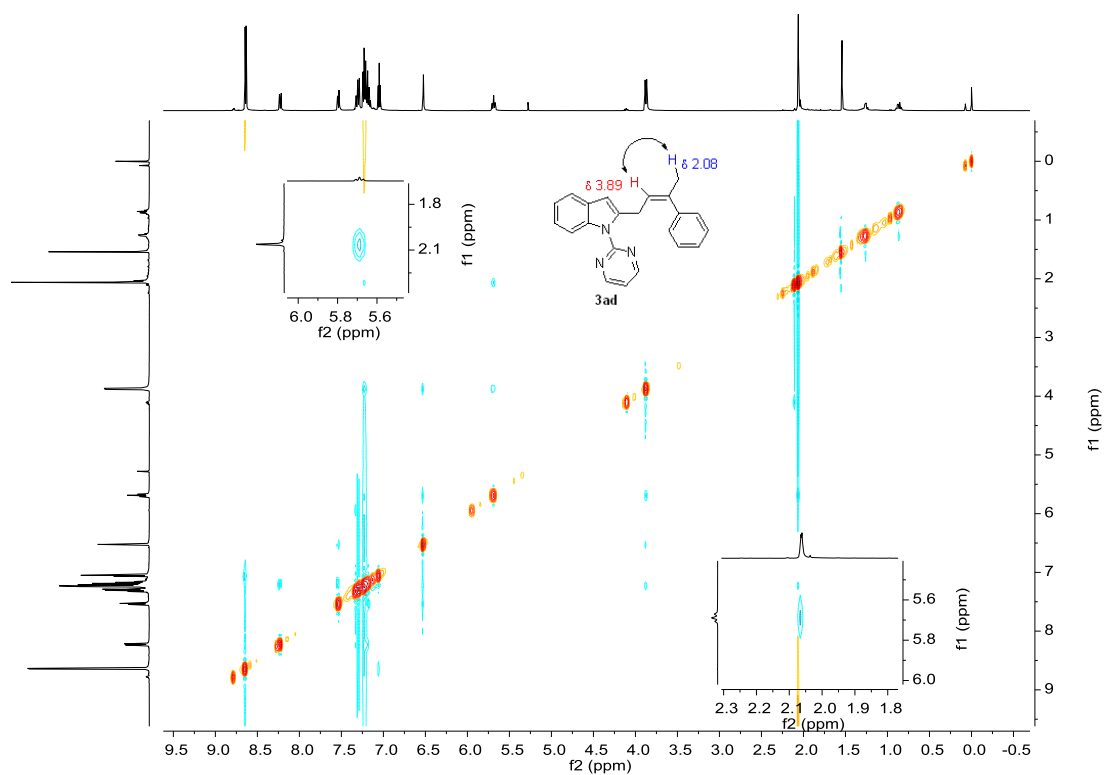

8.56  
8.55  
8.23  
8.21  
8.21  
7.50  
7.50  
7.48  
7.28  
7.27  
7.26  
7.25  
7.25  
7.20  
7.20  
7.19  
7.18  
7.17  
7.17  
7.16  
7.15  
7.14  
7.13  
7.12  
7.12  
7.01  
7.00  
6.96  
6.54  
6.51  
6.48  
5.84  
5.82  
5.81  
5.81  
5.78  
4.18  
4.16

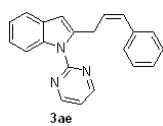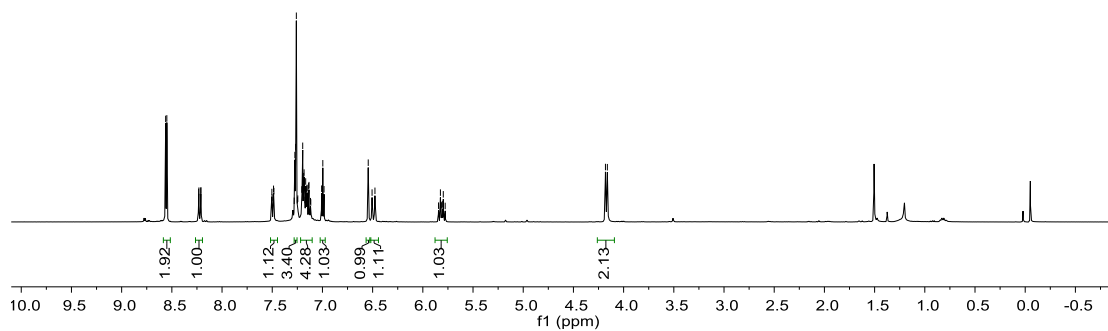

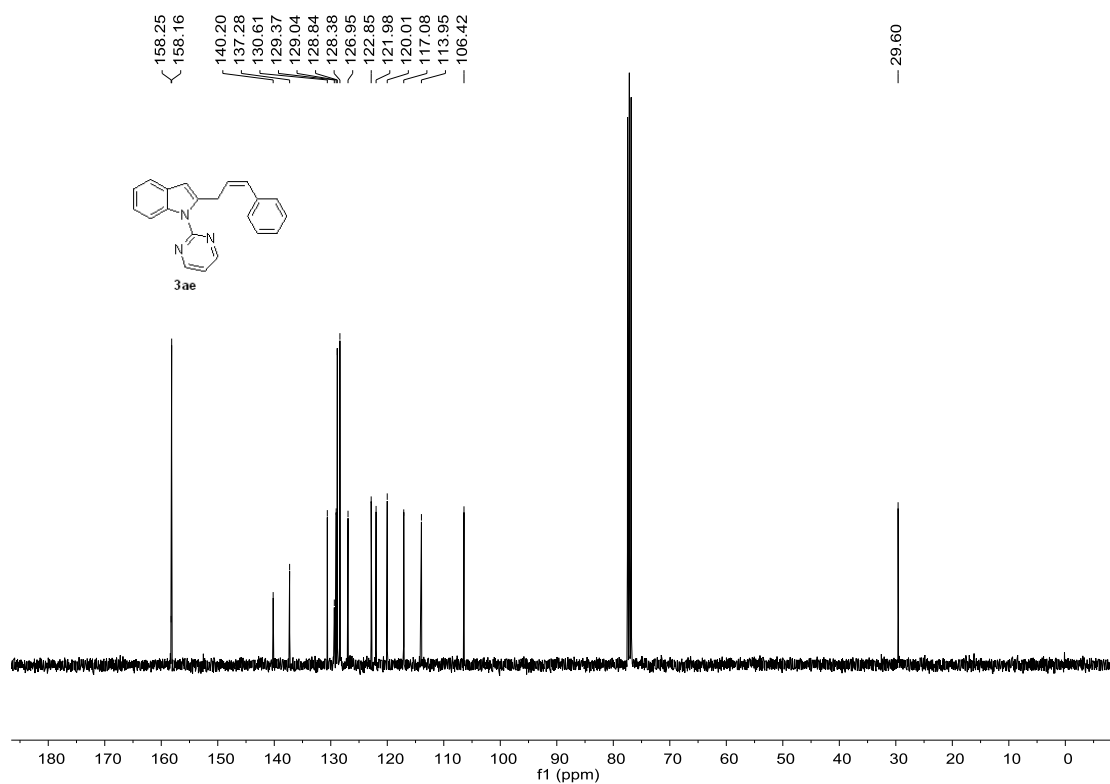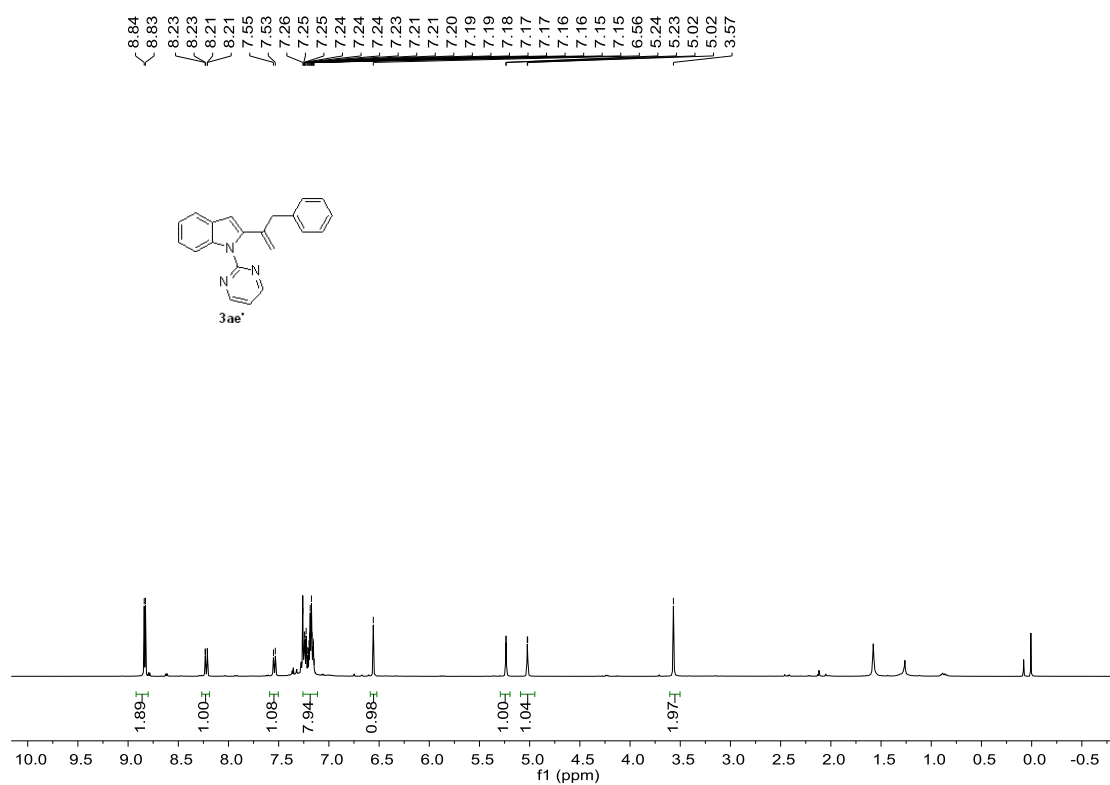

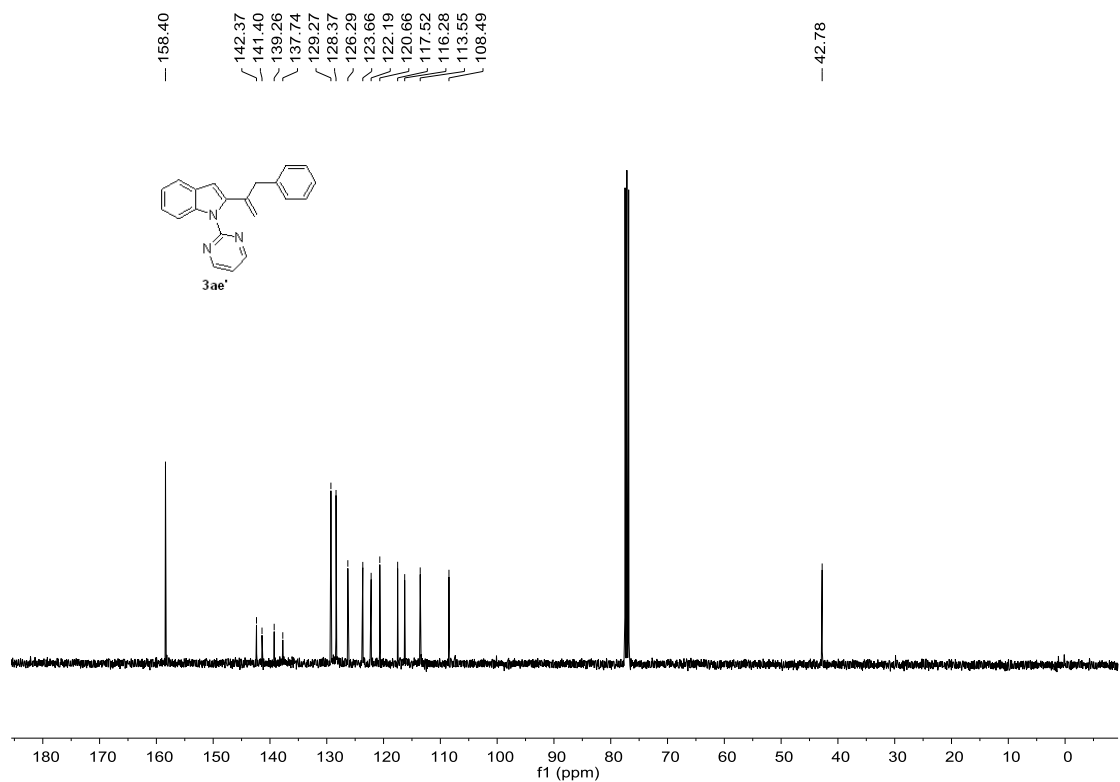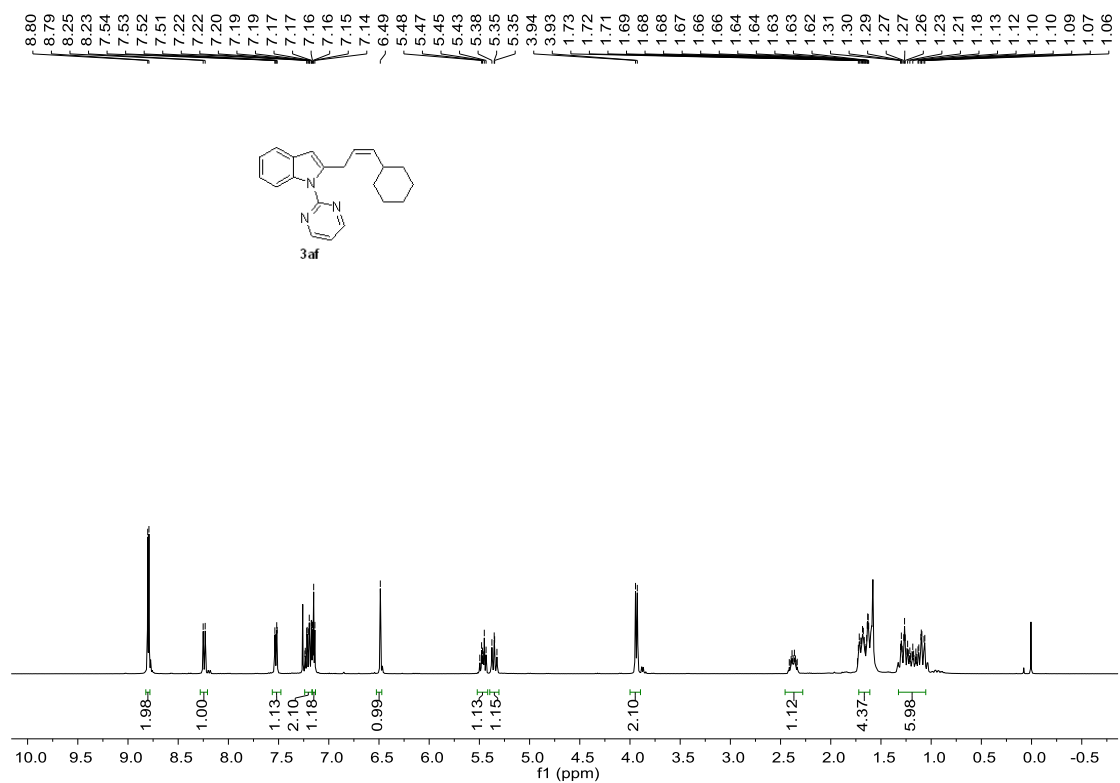

$\swarrow$  158.42  
 $\searrow$  158.26  
 $\swarrow$  141.03  
 $\searrow$  137.91  
 $\swarrow$  137.25  
 $\searrow$  129.44  
 $\swarrow$  124.27  
 $\searrow$  122.65  
 $\swarrow$  121.90  
 $\searrow$  119.90  
 $\swarrow$  117.15  
 $\searrow$  113.82  
 — 106.19  
 $\swarrow$  36.42  
 $\searrow$  33.40  
 $\swarrow$  28.21  
 $\searrow$  26.17  
 $\swarrow$  26.05

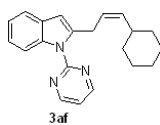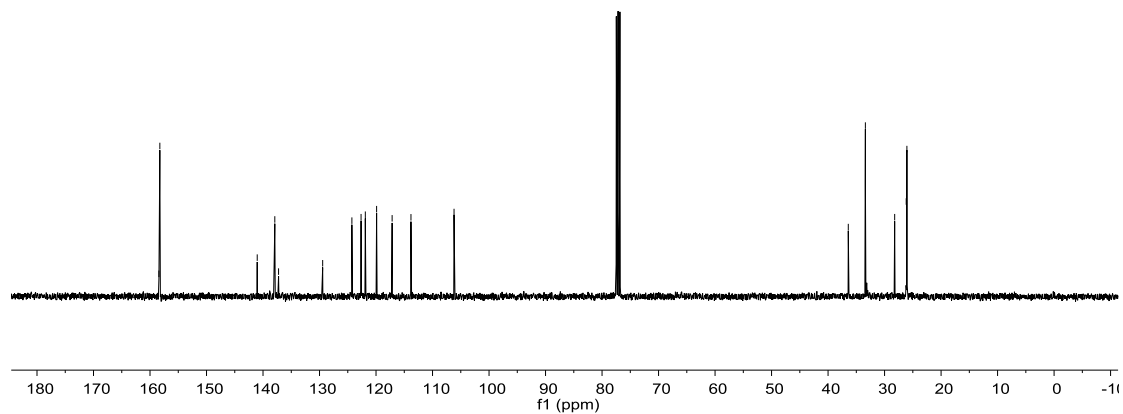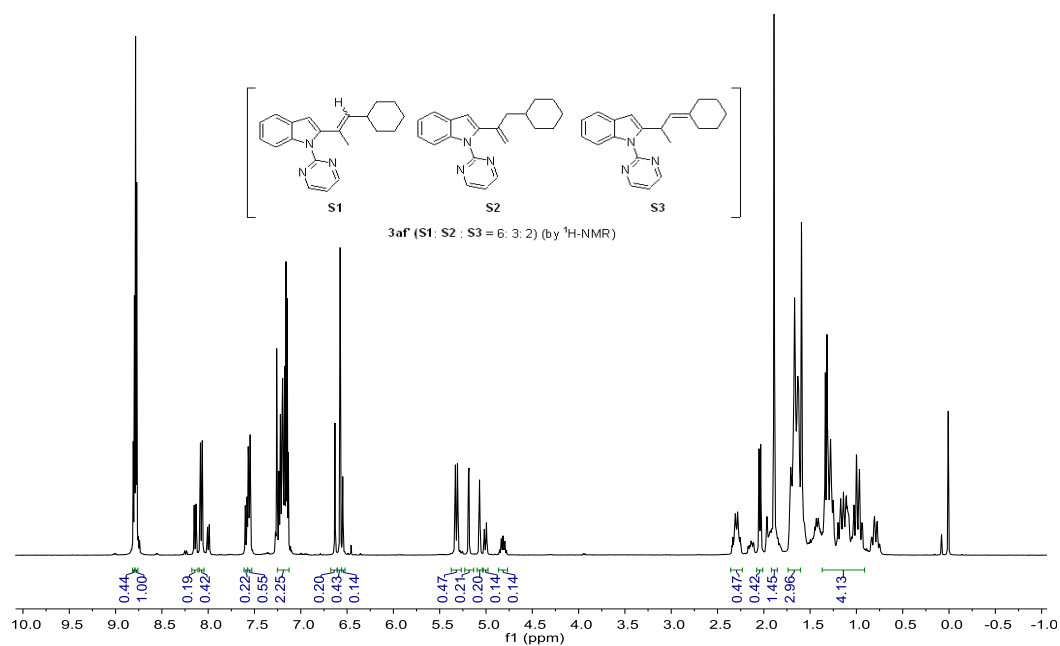

Supplement: Supplementary file 1 [file 9448924]
